# Supplementary material for: Intramolecular iron(ii)-catalyzed aminobromination of allyl N-tosyloxycarbamates
Source: Royal Society of Chemistry journal article supplement (doi:10.1039/c2ob07190h), 2012-01-01

## Iron(II)-catalyzed aminobromination of allyl *N*-tosyloxycarbamates

Takuma Kamon, Daisuke Shigeoka, Tetsuaki Tanaka, and Takehiko Yoshimitsu\*

*Graduate School of Pharmaceutical Sciences, Osaka University, 1-6 Yamadaoka, Suita, Osaka*

*565-0871, Japan*

*yoshimit@phs.osaka-u.ac.jp*

### Supplementary Information

|                                                                                          |       |
|------------------------------------------------------------------------------------------|-------|
| General                                                                                  | S2    |
| Preparation of <i>N</i> -tosyloxy carbamate <b>8</b> :                                   | S2    |
| Experimental procedure for entry 1 in Table 1:                                           | S3    |
| Experimental procedure for entry 2 in Table 1:                                           | S3-4  |
| Experimental procedure for entry 4 in Table 1:                                           | S4    |
| Experimental procedure for entry 5 in Table 1:                                           | S4    |
| Experimental procedure for entry 6 in Table 1:                                           | S4    |
| Experimental procedure for entry 1 in Table 2:                                           | S5    |
| Experimental procedure for entry 2 in Table 2:                                           | S5-6  |
| Experimental procedure for entry 3 in Table 2:                                           | S6    |
| Experimental procedure for entry 4 in Table 2:                                           | S6    |
| Experimental procedure for entry 5 in Table 2:                                           | S7    |
| Preparation of authentic bromides by nucleophilic bromination of azirizines <b>17-19</b> | S7-8  |
| <sup>1</sup> H NMR and <sup>13</sup> C NMR spectra:                                      | S9-47 |

**General.** Melting points are uncorrected. All reagents were used as received from commercial suppliers unless otherwise stated.  $^1\text{H}$  NMR spectra (500, 400 or 300 MHz) and  $^{13}\text{C}$  NMR spectra (125, 100 or 75 MHz) were measured in the specified solvents. Chemical shifts are reported in ppm relative to the internal solvent signal [chloroform-*d*: 7.26 ppm ( $^1\text{H}$  NMR), 77.0 ppm ( $^{13}\text{C}$  NMR)]. FT-IR spectra were recorded for samples loaded as neat films on NaCl plates. Mass spectra were obtained according to the specified technique. Analytical thin layer chromatography (TLC) was performed using Kieselgel 60 F<sub>254</sub>, and compounds were visualized with UV light, anisaldehyde solution or phosphomolybdic acid in EtOH.

**Scheme 1.** Preparation of *N*-tosyloxy carbamate **8**

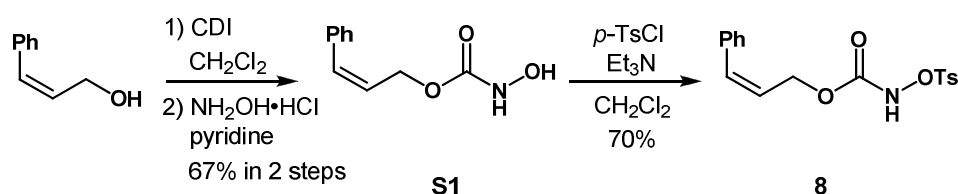

**Preparation of (Z)-3-Phenylallyl hydroxycarbamate (S1):** To a stirred solution of (Z)-cinnamyl alcohol (624 mg, 4.7 mmol) in CH<sub>2</sub>Cl<sub>2</sub> (8 mL) at room temperature was added CDI (829 mg, 5.1 mmol). After 1 h, the mixture was poured into a separation funnel where it was partitioned between sat. NH<sub>4</sub>Cl and CH<sub>2</sub>Cl<sub>2</sub>. The organic layer was separated, dried over MgSO<sub>4</sub>, filtered, and concentrated under reduced pressure. The residue was used for the next reaction without purification. The residue was dissolved in pyridine (10 mL), and hydroxylamine hydrochloride (969 mg, 14.0 mmol) was added to the mixture. After being stirred for 30 min at room temperature, the mixture was extracted with Et<sub>2</sub>O and washed with 10% H<sub>2</sub>SO<sub>4</sub>. The organic phase was separated, dried over MgSO<sub>4</sub>, filtered, and concentrated under reduced pressure. The residue was purified by flash silica gel column chromatography (EtOAc/*n*-hexane 1:2) to give *N*-hydroxy carbamate **S1** (606 mg, 67% in 2 steps) as a colorless solid. ***N*-hydroxy carbamate S1:** Colorless solids of mp 35-36 °C; IR (neat)  $\nu$  3291, 1717 cm<sup>-1</sup>;  $^1\text{H}$  NMR (300 MHz CDCl<sub>3</sub>)  $\delta$  7.41-7.15 (m, 5H), 6.69 (d, 1H,  $J$  = 11.7 Hz), 6.14 (brs, 1H), 5.81 (dt, 1H,  $J$  = 11.7, 6.9 Hz), 4.94 (dd, 2H,  $J$  = 6.9, 1.7 Hz);  $^{13}\text{C}$  NMR (100 MHz, CDCl<sub>3</sub>)  $\delta$  159.1, 135.8, 133.5, 128.7, 128.4, 127.6, 125.2, 63.1; MS  $m/z$ : 216 [M+Na]<sup>+</sup>, 55 (100%); HRMS (FAB) calcd for C<sub>10</sub>H<sub>11</sub>NO<sub>3</sub>Na [M+Na]<sup>+</sup>: 216.0637, found: 216.0626.

**Preparation of (Z)-3-phenylallyl hydroxycarbamate (8):** To a stirred solution of *N*-hydroxy carbamate **S1** (548 mg, 2.8 mmol) in Et<sub>2</sub>O (8 mL) at room temperature were added *p*-TsCl (541 mg, 2.8 mmol) and Et<sub>3</sub>N (356  $\mu\text{L}$ , 2.6 mmol). After 3 h, the mixture was filtered through a pad of celite, and the filter cake was washed with Et<sub>2</sub>O. The filtrate was concentrated under reduced pressure. The residue was purified by flash silica gel column chromatography (EtOAc/*n*-hexane 1:3) to give *N*-tosyloxy carbamate **8** (688 mg, 70%) as a colorless solid. ***N*-tosyloxy carbamate 8:** Colorless fine needles of mp 119-120 °C (EtOAc/*n*-hexane); IR (neat)  $\nu$  3281, 1742, 1381, 1192, 1090 cm<sup>-1</sup>;  $^1\text{H}$  NMR (300 MHz CDCl<sub>3</sub>)  $\delta$  7.93-7.84 (m, 3H), 7.39-7.24 (m, 5H), 7.16-7.10 (m, 2H), 6.65 (d, 1H,  $J$  = 11.7 Hz), 5.59 (dt, 1H,  $J$  = 11.7, 6.5 Hz), 4.76 (dd, 1H,  $J$  = 6.9, 1.7 Hz), 2.41 (s, 3H);  $^{13}\text{C}$  NMR (100

MHz, CDCl<sub>3</sub>) δ 155.3, 146.1, 135.5, 133.7, 130.1, 129.7, 129.5, 128.6, 128.4, 127.7, 124.3, 63.7, 21.7; MS *m/z*: 348 [M+H]<sup>+</sup>, 154 (100%); HRMS (FAB) calcd for C<sub>17</sub>H<sub>18</sub>SNO<sub>5</sub> [M+H]<sup>+</sup>: 348.0906, found: 348.0888.

**NOTE:** All other substrates **1**, **9**, **10**, **11**, and **12** are known. They were prepared by the established methods,<sup>1,3</sup> and their spectroscopic and analytical data were identical with those reported in the literatures.

**Table 1, entry 1:** To a stirred solution of *N*-tosyloxy carbamate **1** (102 mg, 0.30 mmol) in EtOH (5 mL) at room temperature were added *n*-Bu<sub>4</sub>NBr (114 mg, 0.35 mmol) and FeBr<sub>2</sub> (6.5 mg, 0.030 mmol). After sonicating for 3 min, the mixture was stirred at room temperature for a further 17 h. The mixture was transferred to a separatory funnel where it was partitioned between H<sub>2</sub>O and EtOAc. The organic phase was washed with brine, dried over MgSO<sub>4</sub>, filtered, and concentrated under reduced pressure. The residue was purified by silica gel flash column chromatography (EtOAc/*n*-hexane 2:5 to 1:1) to give unreacted *N*-tosyloxy carbamate **1** (47.8 mg, 47%) as a colorless solid, carbamate **7** (8.4 mg, 16%) as a colorless solid, and a mixture of bromide **4a**, **4b**, oxazolidinone derivative **5a**, and **5b** (25.3 mg) as a colorless solid. The yields and the ratio of the products were determined by <sup>1</sup>H NMR analysis to be **4a/4b** (15.6 mg, 21%, dr = 1.5:1) and **5a/5b** (9.7 mg, 15%). The spectroscopic and analytical data of compounds **4a/4b** and **7** were identical with those obtained by the typical procedure described in the paper.

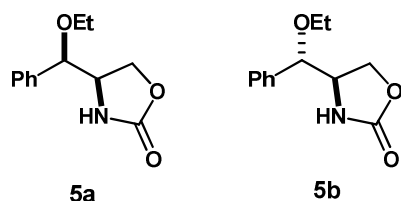

**(RS)-4-[(RS)-Ethoxy(phenyl)methyl]oxazolidin-2-one (5a):** Colorless solids of mp 97-98 °C; IR (neat)  $\nu$  3283, 1759, cm<sup>-1</sup>; <sup>1</sup>H NMR (400 MHz CD<sub>3</sub>OD) δ 7.40-7.19 (m, 5H), 4.19 (m, 1H), 4.10-3.94 (m, 3H), 3.39-3.23 (m, 2H), 1.10 (dt, 3H, *J* = 6.9, 1.4 Hz); <sup>13</sup>C NMR (100 MHz, CD<sub>3</sub>OD) δ 162.2, 138.8, 129.8, 129.7, 128.6, 84.8, 67.6, 65.4, 58.7, 15.5; MS *m/z*: 222 [M+H]<sup>+</sup>, 154 (100%); HRMS (FAB) calcd for C<sub>12</sub>H<sub>16</sub>NO<sub>3</sub> [M+H]<sup>+</sup>: 222.1130, found: 222.1146.

**(RS)-4-[(SR)-Ethoxy(phenyl)methyl]oxazolidin-2-one (5b):** Colorless solids of mp 113-114 °C; IR (neat)  $\nu$  3279, 1751, cm<sup>-1</sup>; <sup>1</sup>H NMR (400 MHz CDCl<sub>3</sub>) δ 7.43-7.29 (m, 5H), 4.67 (brs, 1H), 4.53 (dd, 1H, *J* = 9.2, 8.2 Hz), 4.44 (dd, 1H, *J* = 9.2, 4.6 Hz), 3.89 (ddt, 1H, *J* = 8.2, 4.6, 0.9 Hz), 3.49-3.29 (m, 2H), 1.17 (t, 3H, *J* = 6.9 Hz); <sup>13</sup>C NMR (100 MHz, CDCl<sub>3</sub>) δ 158.8, 137.7, 129.0, 128.9, 127.2, 83.2, 68.4, 64.5, 57.0, 15.1; MS *m/z*: 222 [M+H]<sup>+</sup>, 222 (100%); HRMS (FAB) calcd for C<sub>12</sub>H<sub>16</sub>NO<sub>3</sub>[M+H]<sup>+</sup>: 222.1130, found: 222.1128.

**Table 1, entry 2:** *N*-Tosyloxy carbamate **1** (102 mg, 0.3 mmol) in *i*-PrOH (5 mL) was treated with FeBr<sub>2</sub> (6.2 mg, 0.029 mmol) and *n*-Bu<sub>4</sub>NBr (113 mg, 0.35 mmol) for 14 h. The above-mentioned work-up and subsequent purification of the crude material by silica gel column chromatography

(EtOAc/*n*-hexane 2:5 to 1:1) gave unreacted *N*-tosyloxy carbamate **1** (6.6 mg, 6%) as a colorless solid, carbamate **7** (7.4 mg, 14%) as a colorless solid, and a mixture of bromide **4a**, **4b**, and oxazolidinone derivative **6** (57.5 mg) as a colorless solid. The yields and the ratio of the products were determined by <sup>1</sup>H NMR analysis to be **4a/4b** (51.6 mg, 69%, dr = 3.3:1) and **6** (5.9 mg, 9%).

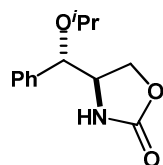

**6**

**(RS)-4-[(SR)-Isopropoxy(phenyl)methyl]oxazolidin-2-one (6):** Colorless solids of mp 116-118 °C; IR (neat)  $\nu$  3279, 1751  $\text{cm}^{-1}$ ; <sup>1</sup>H NMR (400 MHz CDCl<sub>3</sub>)  $\delta$  7.42-7.30 (m, 5H), 4.77 (brs, 1H), 4.50 (t, 1H,  $J$  = 8.7 Hz), 4.40 (dd, 1H,  $J$  = 9.2, 4.6 Hz), 4.26 (d, 1H,  $J$  = 8.2 Hz), 3.85 (dt, 1H,  $J$  = 7.8, 4.6 Hz), 3.52 (septet, 1H,  $J$  = 6.0 Hz), 1.15 (d, 3H,  $J$  = 6.0 Hz), 1.06 (d, 3H,  $J$  = 6.0 Hz); <sup>13</sup>C NMR (100 MHz, CDCl<sub>3</sub>)  $\delta$  158.9, 138.4, 128.9, 128.8, 127.2, 80.5, 69.4, 68.4, 57.1, 23.3, 20.9; MS  $m/z$ : 236 [M+H]<sup>+</sup>, 154 (100%); HRMS (FAB) calcd for C<sub>13</sub>H<sub>18</sub>NO<sub>3</sub> [M+H]<sup>+</sup>: 236.1287, found: 236.1286.

**Table 1, entry 3:** The details are already provided in the paper.

**Table 1, entry 4:** *N*-Tosyloxy carbamate **1** (42.9 mg, 0.12 mmol) in *t*-BuOH (15 mL) was treated with FeBr<sub>2</sub> (30 mg, 0.14 mmol) for 1 h. The above-mentioned work-up and subsequent purification by silica gel column chromatography (EtOAc/*n*-hexane 2:5 to 1:1) gave carbamate **7** (4.7 mg, 21%) as a colorless solid and a mixture of bromides **4a** and **4b** (19.5 mg, 61%, dr = 1.1:1 determined by <sup>1</sup>H NMR analysis) as a colorless solid.

**Table 1, entry 5:** *N*-Tosyloxy carbamate **1** (20.9 mg, 0.060 mmol) in *t*-BuOH (2 mL) was treated with *n*-Bu<sub>4</sub>NBr (19.4 mg, 0.060 mmol) for 17 h. The above-mentioned work-up and subsequent purification by silica gel column chromatography (EtOAc/*n*-hexane 1:3 to 2:5) gave unreacted carbamate **1** (3.4 mg, 16%) as a colorless solid and carbamate **7** (3.4 mg, 32%) as a colorless solid.

**Table 1, entry 6:** Azidoformate **2** (105.1 mg, 0.52 mmol) in *t*-BuOH (8 mL) was treated with FeBr<sub>2</sub> (11.4 mg, 0.052 mmol) and *n*-Bu<sub>4</sub>NBr (200 mg, 0.62 mmol) for 22 h. The above-mentioned work-up and subsequent purification by silica gel column chromatography (EtOAc/*n*-hexane 1:10 to 1:1) gave azidoformate **2** (72.0 mg, 69%) as a colorless solid, carbamate **7** (1.8 mg, 2%) as a colorless solid, and a mixture of bromide **4a** and **4b** (25.6 mg, 19%, dr = 5:1 determined by <sup>1</sup>H NMR analysis).

**Table 2, entry 1:** *N*-Tosyloxy carbamate **8** (108 mg, 0.31 mmol) in *t*-BuOH (5 mL) was treated with FeBr<sub>2</sub> (13.6 mg, 0.062 mmol) and *n*-Bu<sub>4</sub>NBr (120 mg, 0.37 mmol) for 1 h. The above-mentioned work-up and subsequent purification of the crude material by silica gel column chromatography (EtOAc/*n*-hexane 1:2) gave carbamate **S2** (4.1 mg, 7%) as a colorless solid and a mixture of bromide **4a** and **4b** (70.2 mg, 88%, dr = 1:1.5 determined by <sup>1</sup>H NMR analysis).

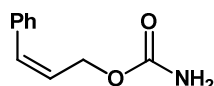

**S2**

**(Z)-3-Phenylallyl carbamate (S2):** Colorless solids of mp 68-70 °C; IR (neat)  $\nu$  3480, 3345, 1715, 1385, 1321  $\text{cm}^{-1}$ ;  $^1\text{H NMR}$  (400 MHz  $\text{CDCl}_3$ )  $\delta$  7.42-7.17 (m, 5H), 6.66 (d, 1H,  $J = 11.9$  Hz), 5.82 (dt, 1H,  $J = 11.9, 6.4$  Hz), 4.85 (dd, 2H,  $J = 6.4, 1.4$  Hz), 4.67 (brs, 2H);  $^{13}\text{C NMR}$  (75 MHz,  $\text{CDCl}_3$ )  $\delta$  156.6, 136.0, 132.7, 128.7, 128.4, 127.5, 126.1, 62.1; MS  $m/z$ : 177 ( $\text{M}^+$ ), 115 (100%); HRMS (EI) calcd for  $\text{C}_{10}\text{H}_{11}\text{NO}_2$  ( $\text{M}^+$ ): 177.0790, found: 177.0815.

**Table 2, entry 2:** *N*-Tosyloxy carbamate **9**<sup>3</sup> (112 mg, 0.36 mmol) in *t*-BuOH (6 mL) was treated with  $\text{FeBr}_2$  (7.9 mg, 0.036 mmol) and *n*- $\text{Bu}_4\text{NBr}$  (138 mg, 0.43 mmol) for 5 h. The above-mentioned work-up and subsequent purification of the crude material by silica gel column chromatography (EtOAc/*n*-hexane 4:5 to 1:0) gave carbamate **S3** (2.0 mg, 4%) as a colorless solid and a mixture of bromide **13a** and **13b** (68.4 mg, 87%, dr = 1:1.5 determined by  $^1\text{H NMR}$  analysis).

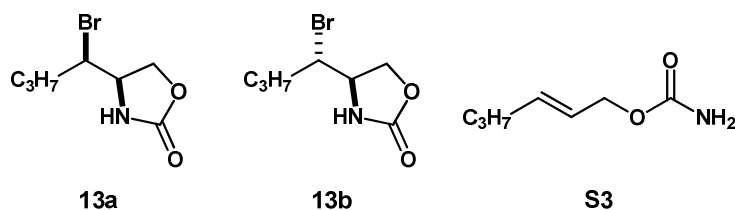

**(RS)-4-[(RS)-1-Bromobutyl]oxazolidin-2-one (13a):** Colorless cubic crystals of mp 97-98 °C (EtOAc/*n*-hexane); IR (neat)  $\nu$  3264, 1748,  $\text{cm}^{-1}$ ;  $^1\text{H NMR}$  (500 MHz  $\text{CDCl}_3$ )  $\delta$  5.59 (brs, 1H), 4.51 (t, 1H,  $J = 9.2$  Hz), 4.23 (dd, 1H,  $J = 9.2, 5.5$  Hz), 4.09 (m, 1H), 3.94 (m, 1H), 1.78-1.63 (m, 3H), 1.46 (m, 1H), 0.96 (t, 3H,  $J = 7.3$  Hz);  $^{13}\text{C NMR}$  (100 MHz,  $\text{CDCl}_3$ )  $\delta$  159.0, 67.8, 57.5, 57.3, 35.4, 20.6, 13.3; MS  $m/z$ : 222 [ $\text{M}+\text{H}$ ]<sup>+</sup>, 154 (100%); HRMS (FAB) calcd for  $\text{C}_7\text{H}_{13}^{79}\text{BrNO}_2$  [ $\text{M}+\text{H}$ ]<sup>+</sup>: 222.0130, found: 222.0135.

**(RS)-4-[(SR)-1-Bromobutyl]oxazolidin-2-one (13b):** Colorless needles of mp 58-60 °C (EtOAc/*n*-hexane); IR (neat)  $\nu$  3258, 1751  $\text{cm}^{-1}$ ;  $^1\text{H NMR}$  (500 MHz  $\text{CDCl}_3$ )  $\delta$  6.03 (brs, 1H), 4.53 (t, 1H,  $J = 9.2$  Hz), 4.30 (dd, 1H,  $J = 9.2, 4.9$  Hz), 4.08 (m, 1H), 3.92 (ddd, 1H,  $J = 9.8, 7.3, 3.1$  Hz), 1.85-1.61 (m, 3H), 1.47 (m, 1H), 0.96 (t, 3H,  $J = 7.3$  Hz);  $^{13}\text{C NMR}$  (100 MHz,  $\text{CDCl}_3$ )  $\delta$  160.0, 69.2, 57.7, 57.3, 36.0, 20.2, 13.2; MS  $m/z$ : 222 [ $\text{M}+\text{H}$ ]<sup>+</sup>, 154 (100%); HRMS (FAB) calcd for  $\text{C}_7\text{H}_{13}^{79}\text{BrNO}_2$  [ $\text{M}+\text{H}$ ]<sup>+</sup>: 222.0130, found: 222.0134.

**(E)-Hex-2-en-1-yl carbamate (S3):** Colorless solids of mp 47-48 °C; IR (neat)  $\nu$  3435, 3335, 1683,  $\text{cm}^{-1}$ ;  $^1\text{H NMR}$  (400 MHz  $\text{CDCl}_3$ )  $\delta$  5.77 (dt, 1H,  $J = 15.1, 6.9$  Hz) 5.57 (dt, 1H,  $J = 15.1, 6.4$  Hz) 4.67 (brs, 2H), 4.50 (d, 1H,  $J = 6.4$  Hz), 2.03 (q, 2H,  $J = 7.3$  Hz), 1.41 (sextet, 2H,  $J = 7.3$  Hz), 0.90 (t, 3H,  $J = 7.3$  Hz);  $^{13}\text{C NMR}$  (125 MHz,  $\text{CDCl}_3$ )  $\delta$  156.7, 136.2, 124.2, 65.9, 34.3, 22.0, 13.6; MS  $m/z$ : 143 ( $\text{M}^+$ ) 67 (100%); HRMS (EI) calcd for  $\text{C}_7\text{H}_{13}\text{NO}_2$  ( $\text{M}^+$ ): 143.0946, found: 143.0952.

**Table 2, entry 3:** *N*-Tosyloxy carbamate **10**<sup>1</sup> (100 mg, 0.32 mmol) in *t*-BuOH (5 mL) was treated with  $\text{FeBr}_2$  (14.1 mg, 0.064 mmol) and *n*- $\text{Bu}_4\text{NBr}$  (124 mg, 0.39 mmol) for 1 h. The above-mentioned

work-up and subsequent purification of the crude material by silica gel column chromatography (EtOAc/*n*-hexane 2:3) gave a mixture of bromide **13a** and **13b** (61.8 mg, 87%, dr = 1:1.9 determined by <sup>1</sup>H NMR analysis). The spectroscopic and analytical data of compounds **13a/13b** were identical with those obtained above.

**Table 2, entry 4:** *N*-Tosyloxy carbamate **11**<sup>1</sup> (110 mg, 0.30 mmol) in *t*-BuOH (5 mL) was treated with FeBr<sub>2</sub> (13.3 mg, 0.060 mmol) and *n*-Bu<sub>4</sub>NBr (117 mg, 0.36 mmol) for 3 h. The above-mentioned work-up and subsequent purification of the crude material by silica gel column chromatography (EtOAc/*n*-hexane 1:5 to 1:0) gave azirizine **16** (2.2 mg, 4%) as a colorless solid, carbamate **S4** (3.5 mg, 6%) as a colorless solid, and bromide **14** (70.6 mg, 85%) as a colorless solid. The spectroscopic data of azirizine **16** were identical with those reported.<sup>1</sup>

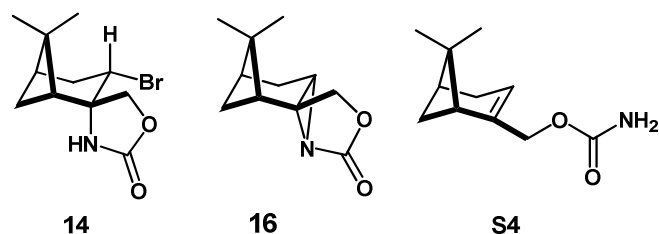

**(1R,2S,3S,5R)-3-Bromo-6,6-dimethylspiro[bicyclo[3.1.1]heptane-2,4'-oxazolidin]-2'-one (14):** Colorless cubic crystals of mp 156-157 °C (EtOAc/*n*-hexane); [ $\alpha$ ]<sub>D</sub><sup>25</sup> +25.3 (*c* 1.01, CHCl<sub>3</sub>); IR (neat)  $\nu$  3237, 1751 cm<sup>-1</sup>; <sup>1</sup>H NMR (300 MHz CDCl<sub>3</sub>)  $\delta$  6.52 (brs, 1H), 4.60 (dd, 1H, *J* = 10.0, 7.6 Hz), 4.21 (d, 1H, *J* = 16.2 Hz), 4.18 (d, 1H, *J* = 16.2 Hz), 2.73 (m, 1H), 2.53-2.34 (m, 3H), 2.04 (m, 1H), 1.30 (s, 3H), 1.22 (d, 1H, *J* = 11.0 Hz), 1.00 (s, 3H); <sup>13</sup>C NMR (100 MHz, CDCl<sub>3</sub>)  $\delta$  158.6, 76.8, 65.2, 53.8, 52.4, 41.7, 39.8, 38.2, 29.6, 27.2, 23.6; MS *m/z*: 274 [M+H]<sup>+</sup>, 154 (100%); HRMS (FAB) calcd for C<sub>11</sub>H<sub>17</sub><sup>79</sup>Br NO<sub>2</sub> [M+H]<sup>+</sup>: 274.0443, found: 274.0421.

**[(1R,5S)-6,6-Dimethylbicyclo[3.1.1]hept-2-en-2-yl]methyl carbamate (S4):** Colorless needles of mp 62-63 °C (EtOAc/*n*-hexane); [ $\alpha$ ]<sub>D</sub><sup>25</sup> -42.5 (*c* 1.71, CHCl<sub>3</sub>); IR (neat)  $\nu$  3464, 3347, 1715, 1329 cm<sup>-1</sup>; <sup>1</sup>H NMR (400 MHz CDCl<sub>3</sub>)  $\delta$  5.56 (m, 1H), 4.61 (brs, 2H), 4.49-4.38 (m, 2H), 2.40 (dt, 1H, *J* = 8.7, 5.5 Hz), 2.36-2.20 (m, 2H), 2.16-2.07 (m, 2H), 1.60 (d, 1H, *J* = 3.2 Hz), 1.29 (s, 3H), 1.18 (d, 1H, 8.2 Hz), 0.83 (s, 3H); <sup>13</sup>C NMR (100 MHz, CDCl<sub>3</sub>)  $\delta$  157.1, 143.2, 121.1, 67.6, 43.3, 40.6, 38.0, 31.4, 31.2, 26.1, 21.0; MS *m/z*: 218 [M+Na]<sup>+</sup>, 23 (100%); HRMS (FAB) calcd for C<sub>11</sub>H<sub>17</sub>NO<sub>2</sub>Na [M+Na]<sup>+</sup>: 218.1157, found: 218.1154.

**Table 2, entry 5:** *N*-Tosyloxy carbamate **12**<sup>3</sup> (101 mg, 0.32 mmol) in *t*-BuOH (5 mL) was treated with FeBr<sub>2</sub> (14.3 mg, 0.065 mmol) and *n*-Bu<sub>4</sub>NBr (126 mg, 0.39 mmol) for 4 h. The above-mentioned work-up and subsequent purification of the crude material by silica gel column chromatography (EtOAc/*n*-hexane 2:3 to 2:1) gave bromide bromide **15a** (53.2 mg, 75%) as a colorless solid and **15b** (14.0 mg, 20%) as a colorless solid.

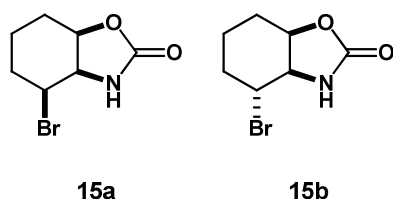

**(3aRS,4SR,7aRS)-4-Bromohexahydrobenzo[d]oxazol-2(3H)-one (15a):** Colorless needles of mp 164-165 °C (EtOAc/*n*-hexane); IR (neat)  $\nu$  3204, 1764  $\text{cm}^{-1}$ ;  $^1\text{H}$  NMR (500 MHz  $\text{CDCl}_3$ )  $\delta$  5.21 (brs, 1H), 4.70 (dt, 1H,  $J = 7.3, 5.5$  Hz), 4.29 (dd, 2H,  $J = 7.3, 4.3$  Hz), 4.14 (ddd, 1H,  $J = 12.2, 4.3, 4.3$  Hz), 2.15-1.94 (m, 3H), 1.92-1.83 (m, 1H), 1.78-1.69 (m, 1H), 1.48-1.37 (m, 1H);  $^{13}\text{C}$  NMR (125 MHz,  $\text{CDCl}_3$ )  $\delta$  158.4, 75.5, 56.5, 48.6, 28.8, 25.2, 19.7; MS  $m/z$ : 220 ( $\text{M}^+$ ), 154 (100%); HRMS (FAB) calcd for  $\text{C}_7\text{H}_{11}^{79}\text{BrNO}_2$  [ $\text{M}+\text{H}$ ] $^+$ : 219.9973, found: 219.9990.

**(3aRS,4RS,7aRS)-4-Bromohexahydrobenzo[d]oxazol-2(3H)-one (15b):** Colorless cubic crystals of mp 128-129 °C (EtOAc/*n*-hexane); IR (neat)  $\nu$  3275, 1755  $\text{cm}^{-1}$ ;  $^1\text{H}$  NMR (500 MHz  $\text{CDCl}_3$ )  $\delta$  5.57 (brs, 1H), 4.66 (m, 1H), 3.86 (ddd, 1H,  $J = 12.2, 8.5, 3.7$  Hz), 3.78 (dd, 1H,  $J = 8.5, 6.1$  Hz), 2.31-2.22 (m, 2H), 1.79-1.56 (m, 4H);  $^{13}\text{C}$  NMR (75 MHz,  $\text{CDCl}_3$ )  $\delta$  159.1, 76.9, 60.8, 53.7, 32.5, 25.8, 20.6; MS  $m/z$ : 220 [ $\text{M}+\text{H}$ ] $^+$ , 154 (100%); HRMS (FAB) calcd for  $\text{C}_7\text{H}_{11}^{79}\text{BrNO}_2$  [ $\text{M}+\text{H}$ ] $^+$ : 219.9973, found: 219.9975.

#### Preparation of authentic bromides by nucleophilic bromination of aziridines 17-19:

##### Scheme 2. Bromination of aziridine 17

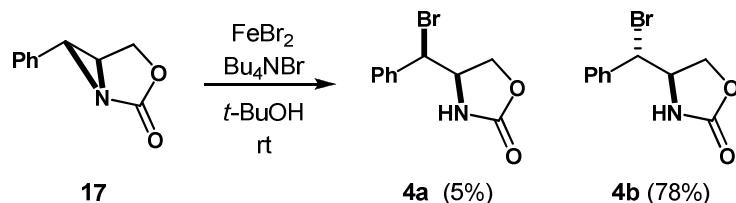

**(RS)-4-[(RS)-Bromo(phenyl)methyl]oxazolidin-2-one (4a),**

**(RS)-4-[(SR)-Bromo(phenyl)methyl]oxazolidin-2-one (4b):** To a stirred solution of aziridine **17**<sup>1</sup> (13.3 mg, 0.0759 mmol) in *t*-BuOH (11 mL) at room temperature were added *n*-Bu<sub>4</sub>NBr (48.9 mg, 0.152 mmol) and FeBr<sub>2</sub> (16.7 mg, 0.0759 mmol). The mixture was stirred at room temperature for further 30 min. The mixture was transferred to a separation funnel where it was partitioned between H<sub>2</sub>O and EtOAc. The organic phase was washed with brine, dried over MgSO<sub>4</sub>, filtered, and concentrated under reduced pressure. The residue was purified by flash silica gel column chromatography (EtOAc/*n*-hexane 1:1) to give inseparable mixture of bromides **4a** and **4b** (16.1 mg, 83%, dr = 1:16 determined by  $^1\text{H}$  NMR analysis) as a colorless solid.



**Scheme 3.** Bromination of aziridine **18**

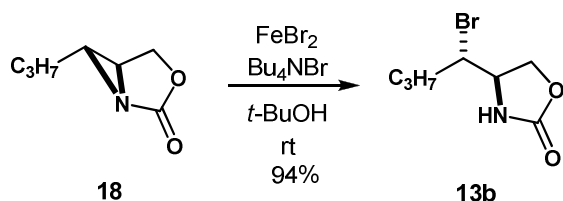

**(RS)-4-[(SR)-1-Bromobutyl]oxazolidin-2-one (13b):** To a stirred solution of aziridine **18**<sup>1</sup> (17.7 mg, 0.125 mmol) in  $t\text{-BuOH}$  (15 mL) at room temperature were added  $n\text{-Bu}_4\text{NBr}$  (80.6 mg, 0.250 mmol) and  $\text{FeBr}_2$  (27.6 mg, 0.125 mmol). The mixture was stirred at room temperature for further 30 min. The mixture was transferred to a separation funnel where it was partitioned between  $\text{H}_2\text{O}$  and EtOAc. The organic phase was washed with brine, dried over  $\text{MgSO}_4$ , filtered, and concentrated under reduced pressure. The residue was purified by flash silica gel column chromatography (EtOAc/ $n$ -hexane 1:1) to give bromide **13b** (26.0 mg, 94%) as a colorless solid.

**Scheme 4.** Bromination of aziridine **19**

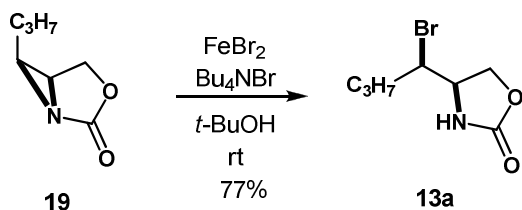

**(RS)-4-[(RS)-1-Bromobutyl]oxazolidin-2-one (13a):** To a stirred solution of aziridine **19**<sup>1</sup> (14.4 mg, 0.102 mmol) in  $t\text{-BuOH}$  (11 mL) at room temperature were added  $n\text{-Bu}_4\text{NBr}$  (65.8 mg, 0.204 mmol) and  $\text{FeBr}_2$  (22.0 mg, 0.102 mmol). The mixture was stirred at room temperature for further 1 h. The mixture was transferred to a separation funnel where it was partitioned between  $\text{H}_2\text{O}$  and EtOAc. The organic phase was washed with brine, dried over  $\text{MgSO}_4$ , filtered, and concentrated under reduced pressure. The residue was purified by flash silica gel column chromatography (EtOAc/ $n$ -hexane 1:1) to give bromide **13a** (17.4 mg, 77%) as a colorless solid.

**Reference**

1. (a) Lebel, H.; Huard, K.; Lectard, S. *J. Am. Chem. Soc.* **2005**, *127*, 14198. (b) Lebel, H.; Lectard, S.; Parmentier, M. *Org. Lett.* **2007**, *9*, 4797-4800.
2. Jung, Y. H.; Kim, J. D. *Arch. Pharm. Res.* **2001**, *24*, 371-376.
3. Liu, R.; Herron, S. R.; Fleming, S. A. *J. Org. Chem.* **2007**, *72*, 5587-5591.



500MHz, CDCl<sub>3</sub>

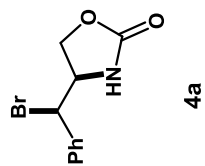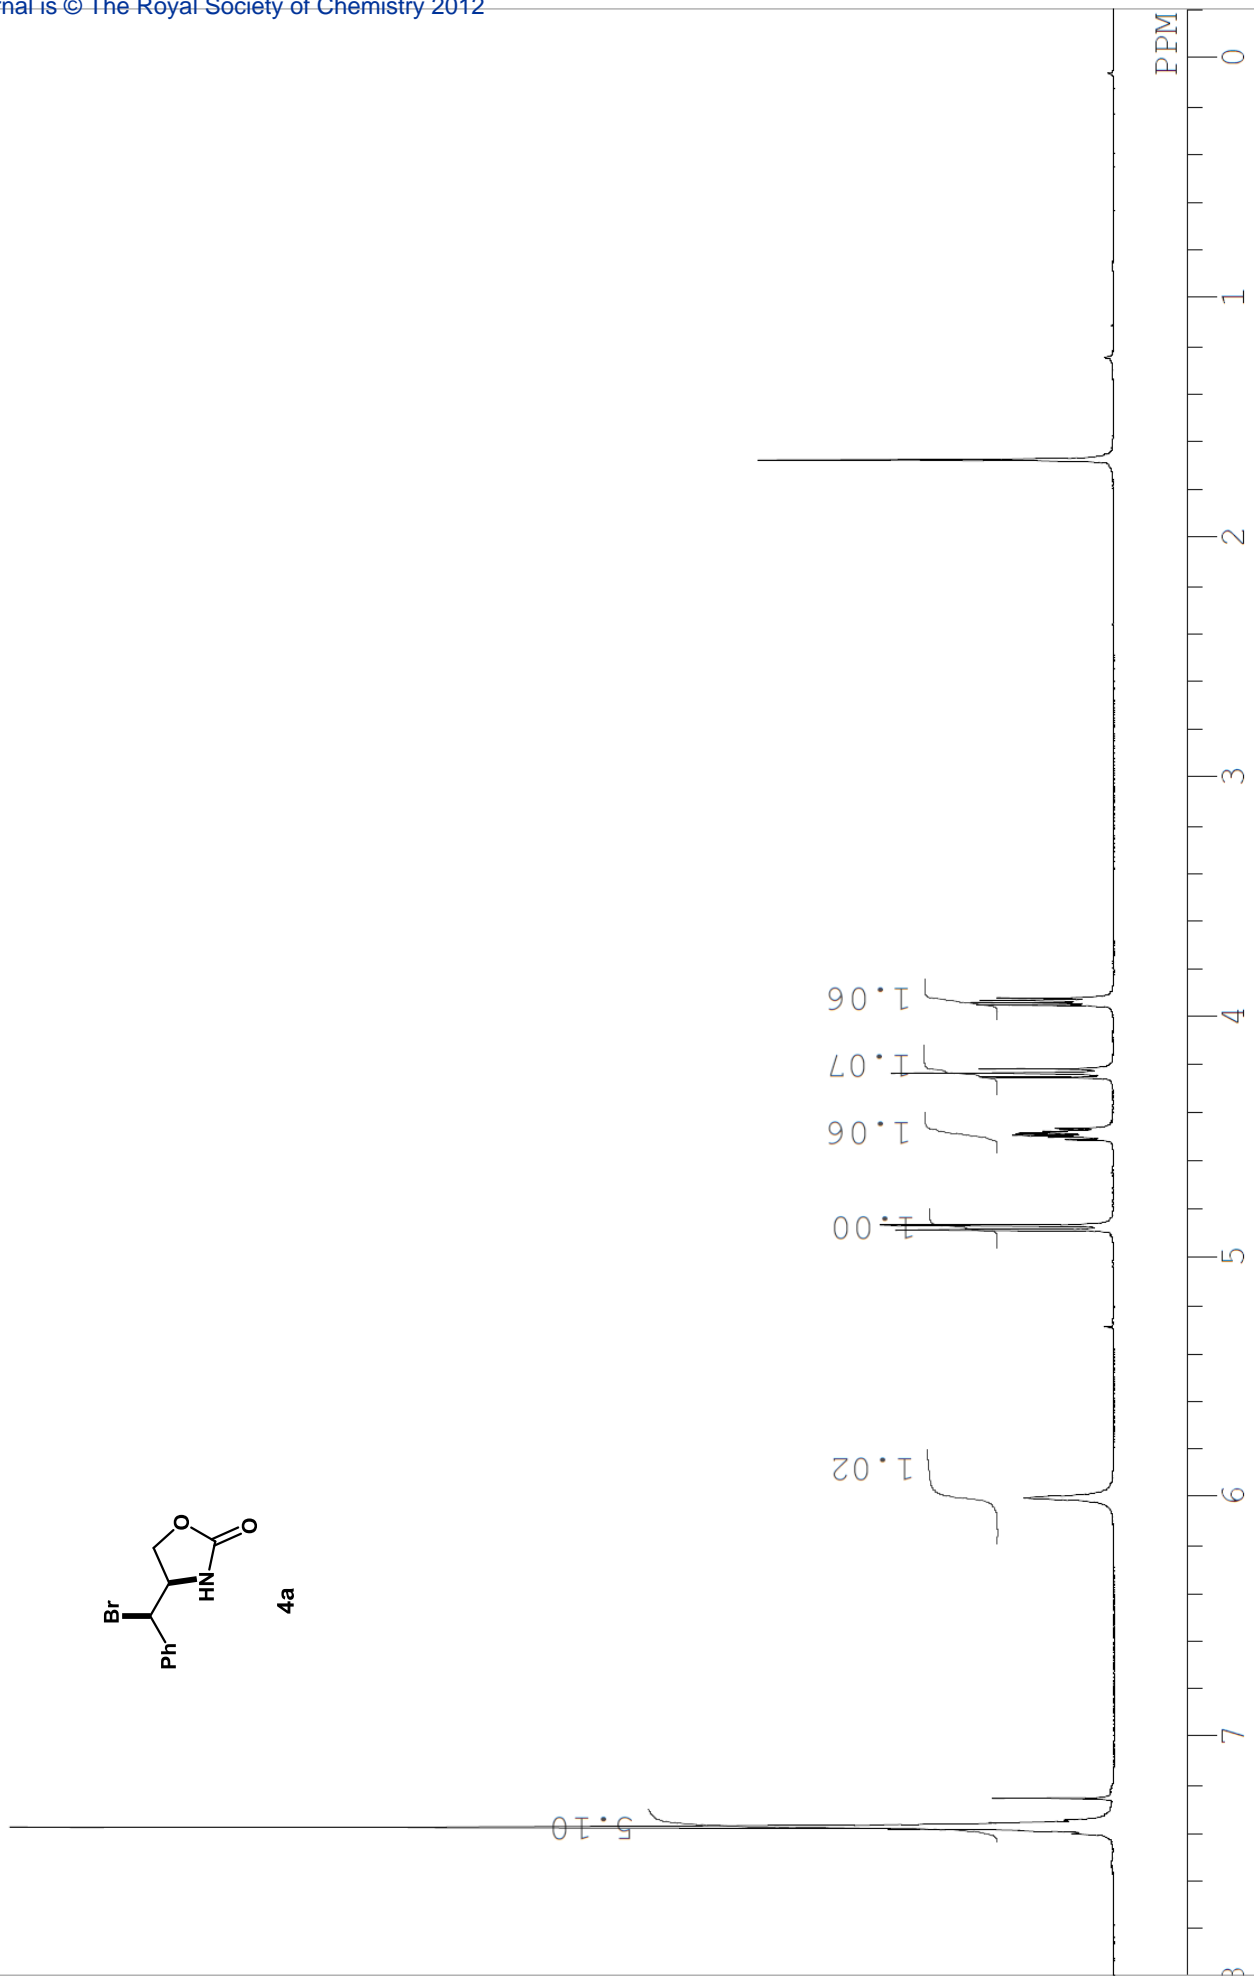

125MHz, CDCl<sub>3</sub>

56.658  
58.657  
67.269  
76.745  
77.000  
77.255

127.900  
129.339  
129.668  
136.430

158.030

PPM

0 25 50 75 100 125 150 175

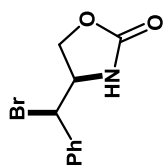

400MHz, CDCl<sub>3</sub>

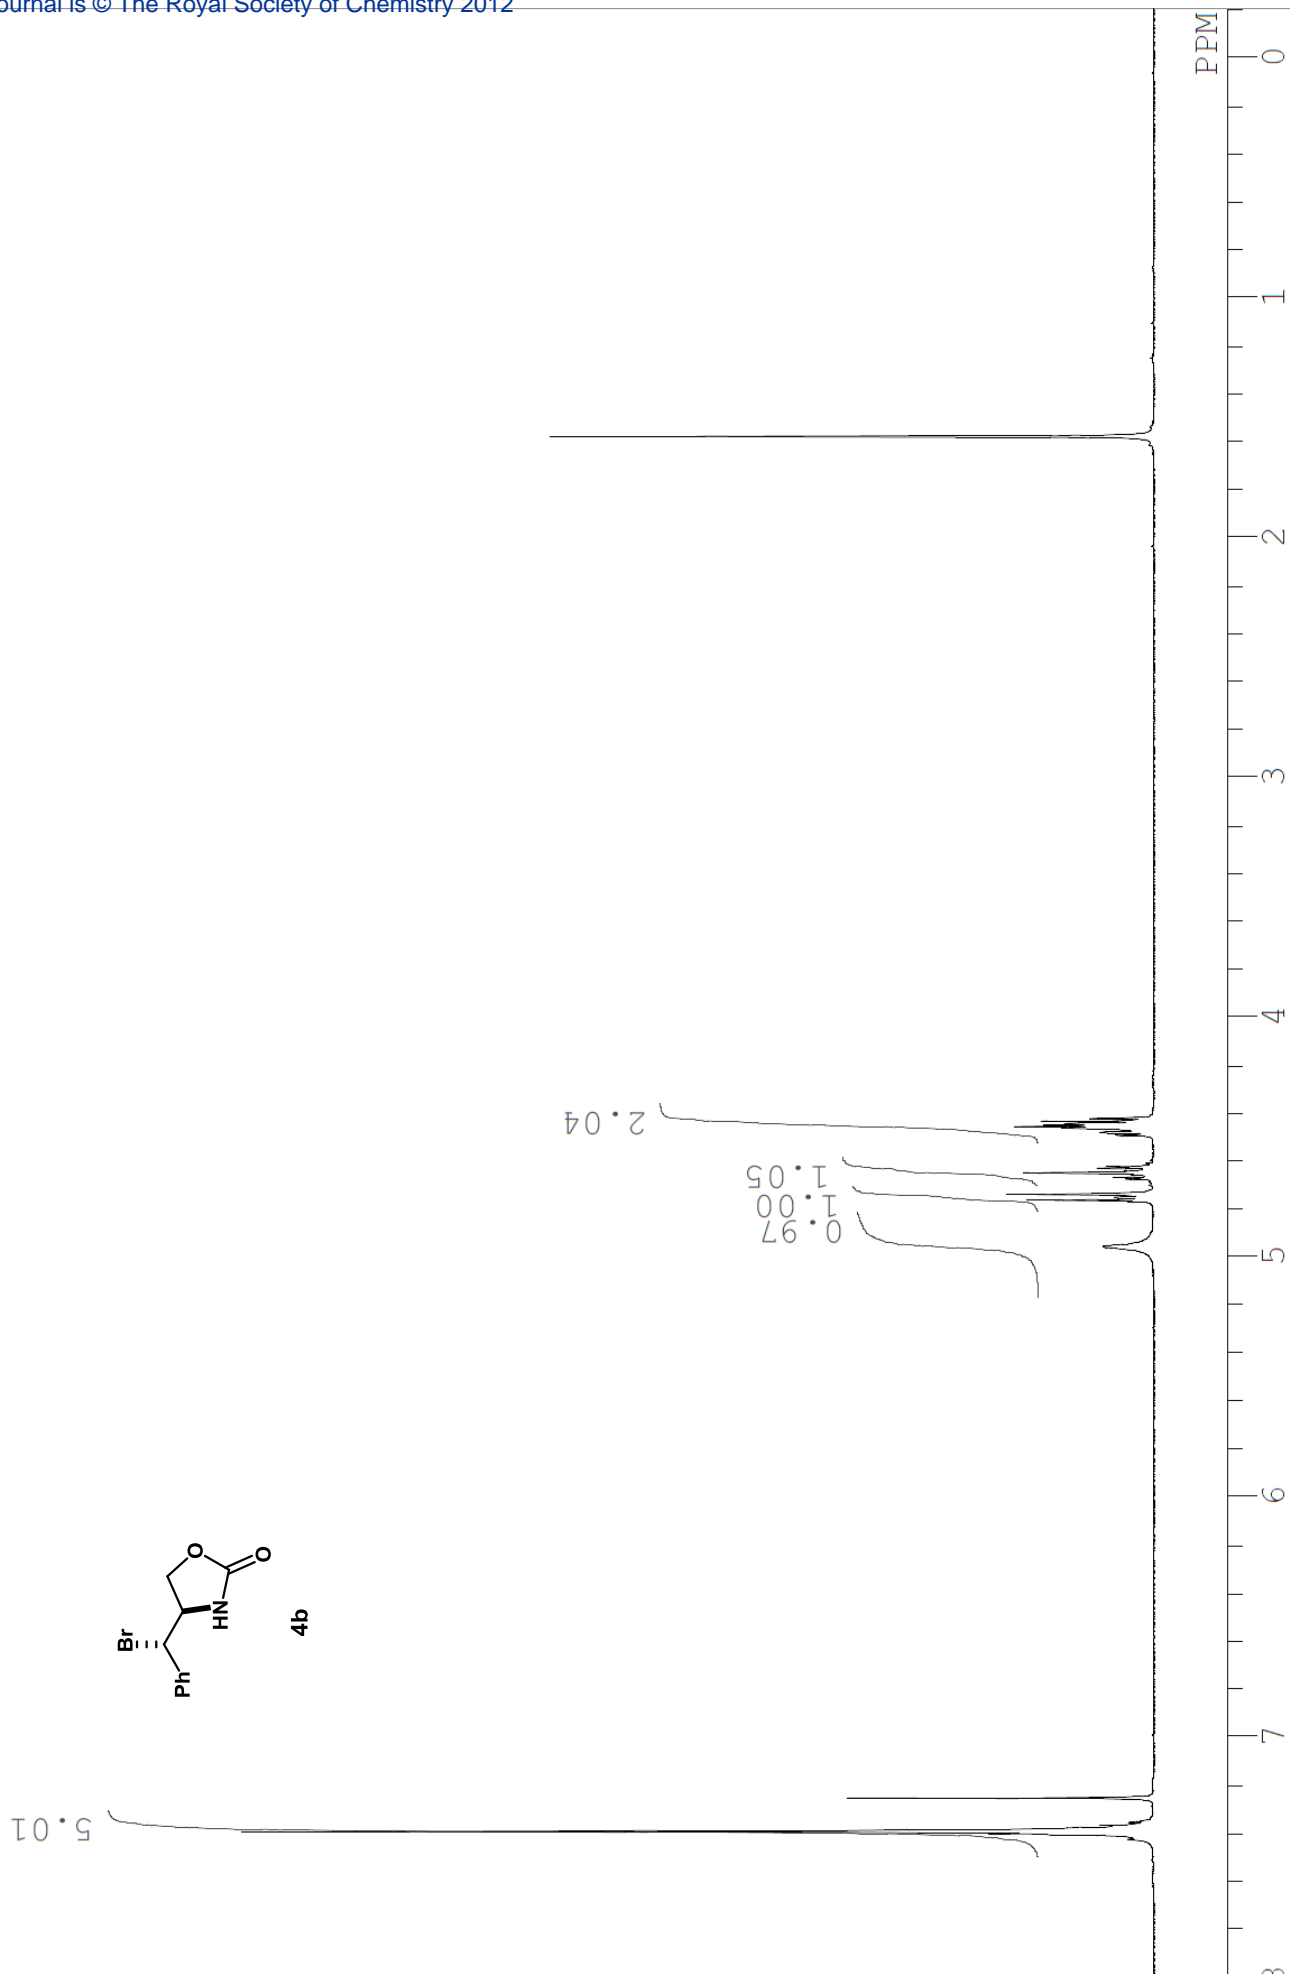

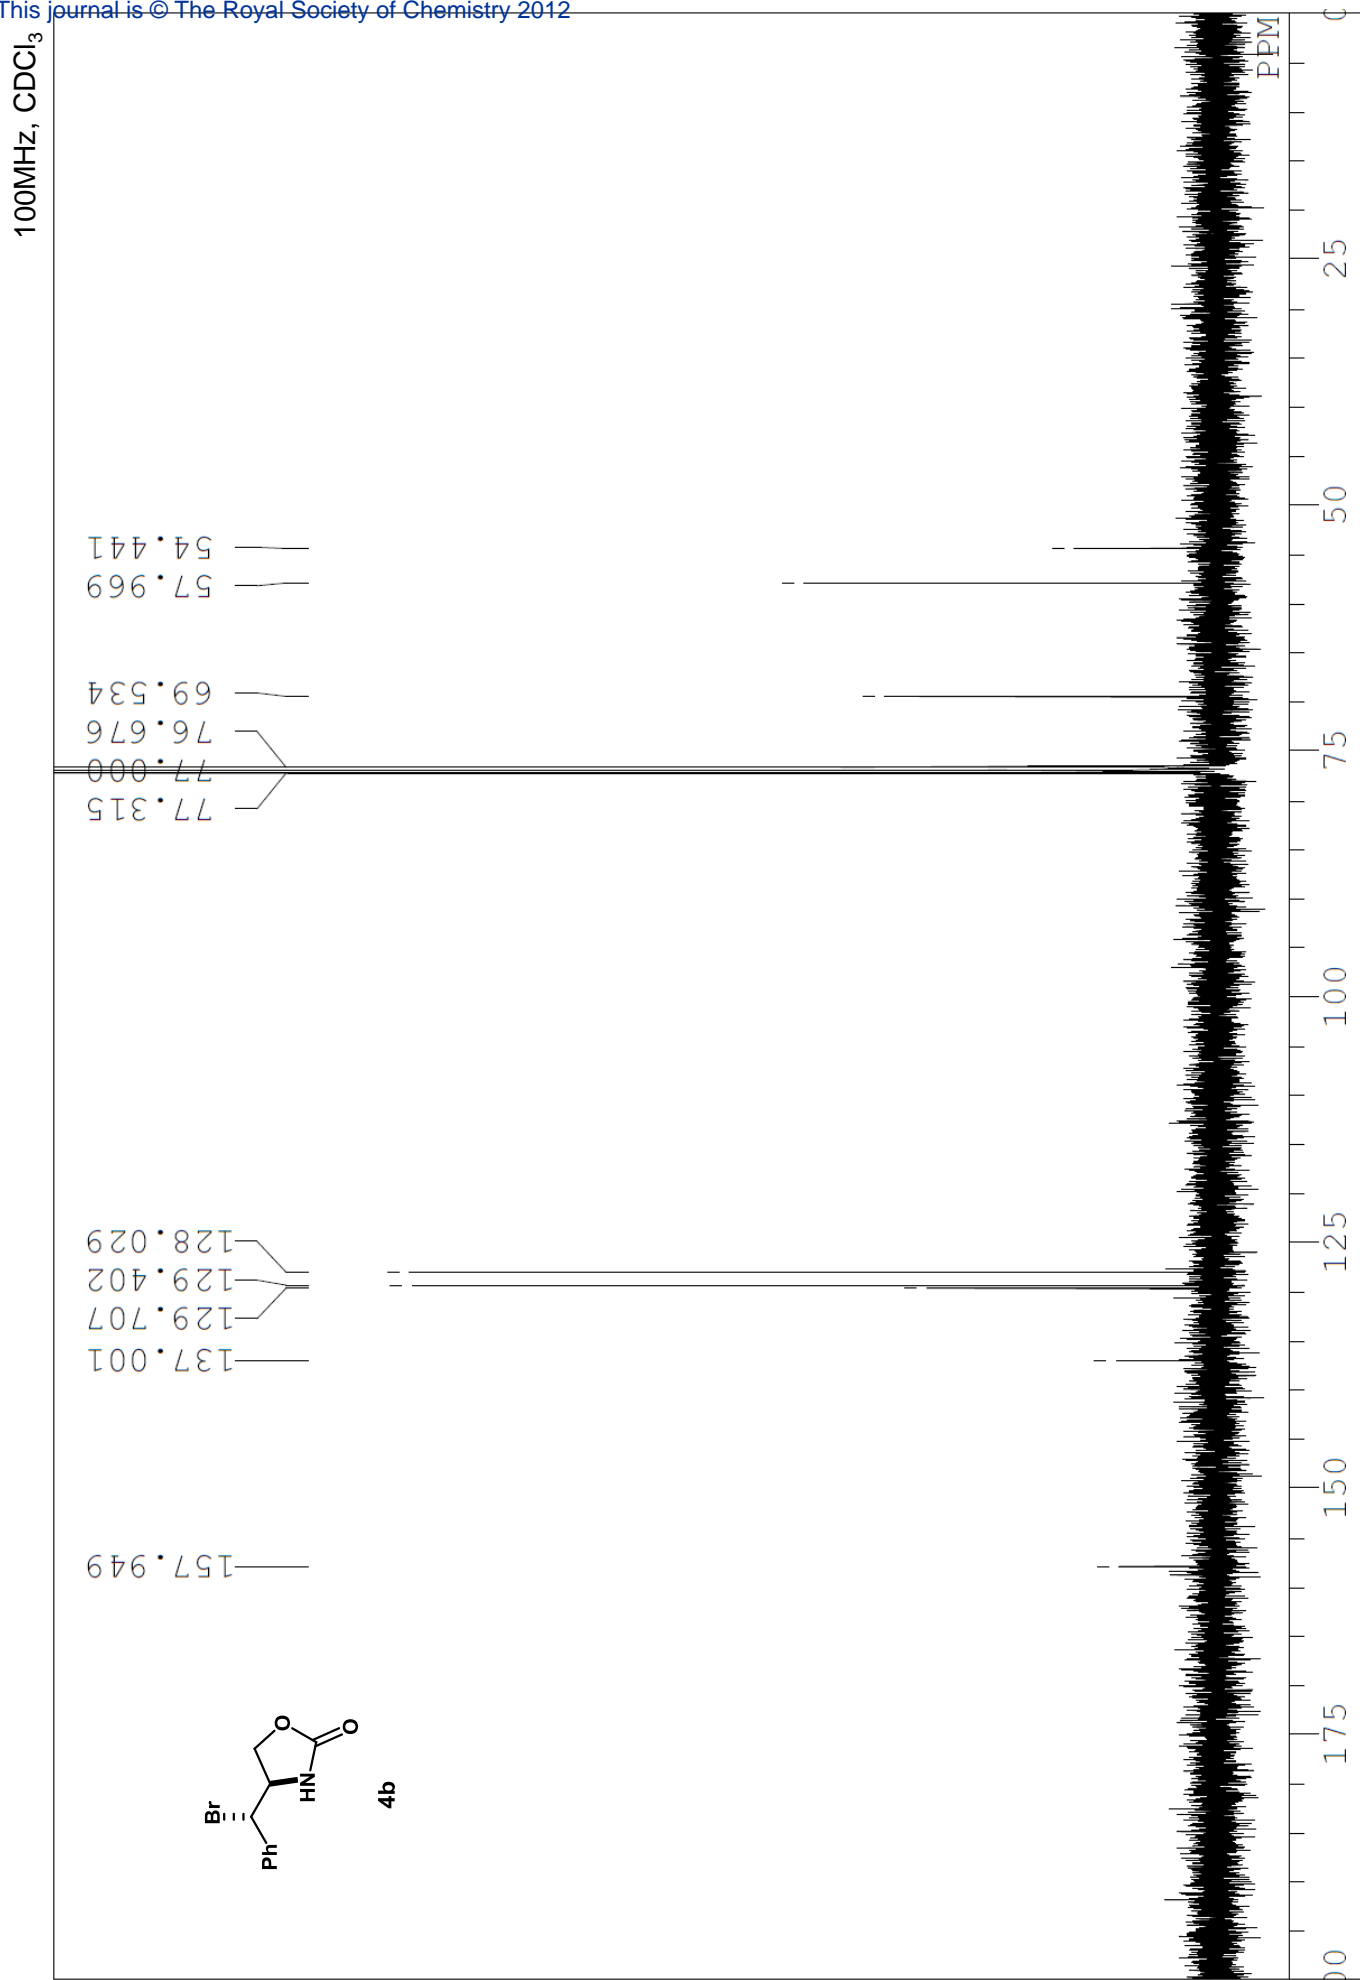

500MHz, CDCl<sub>3</sub>

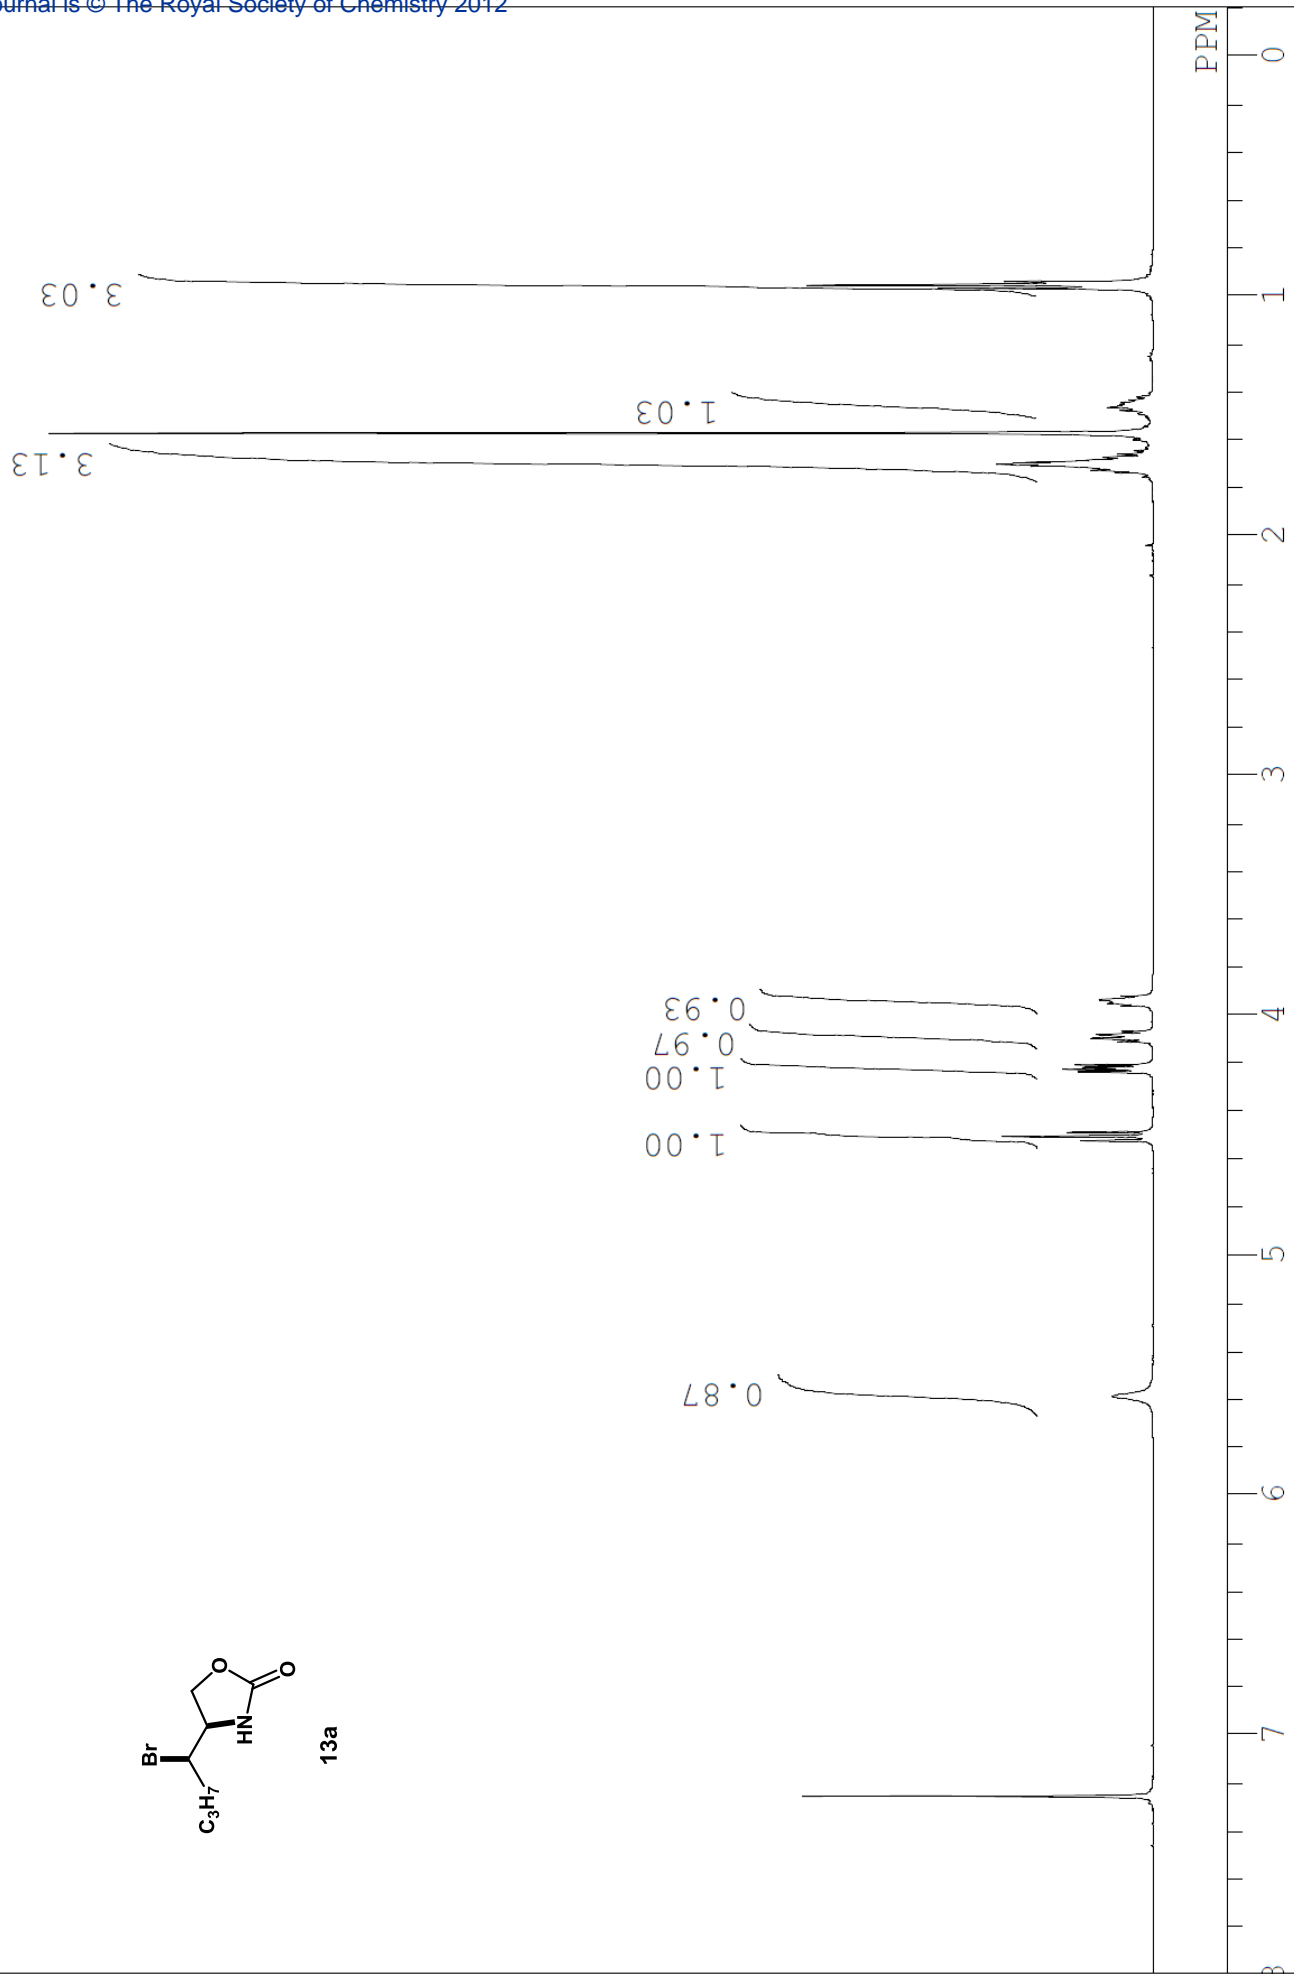

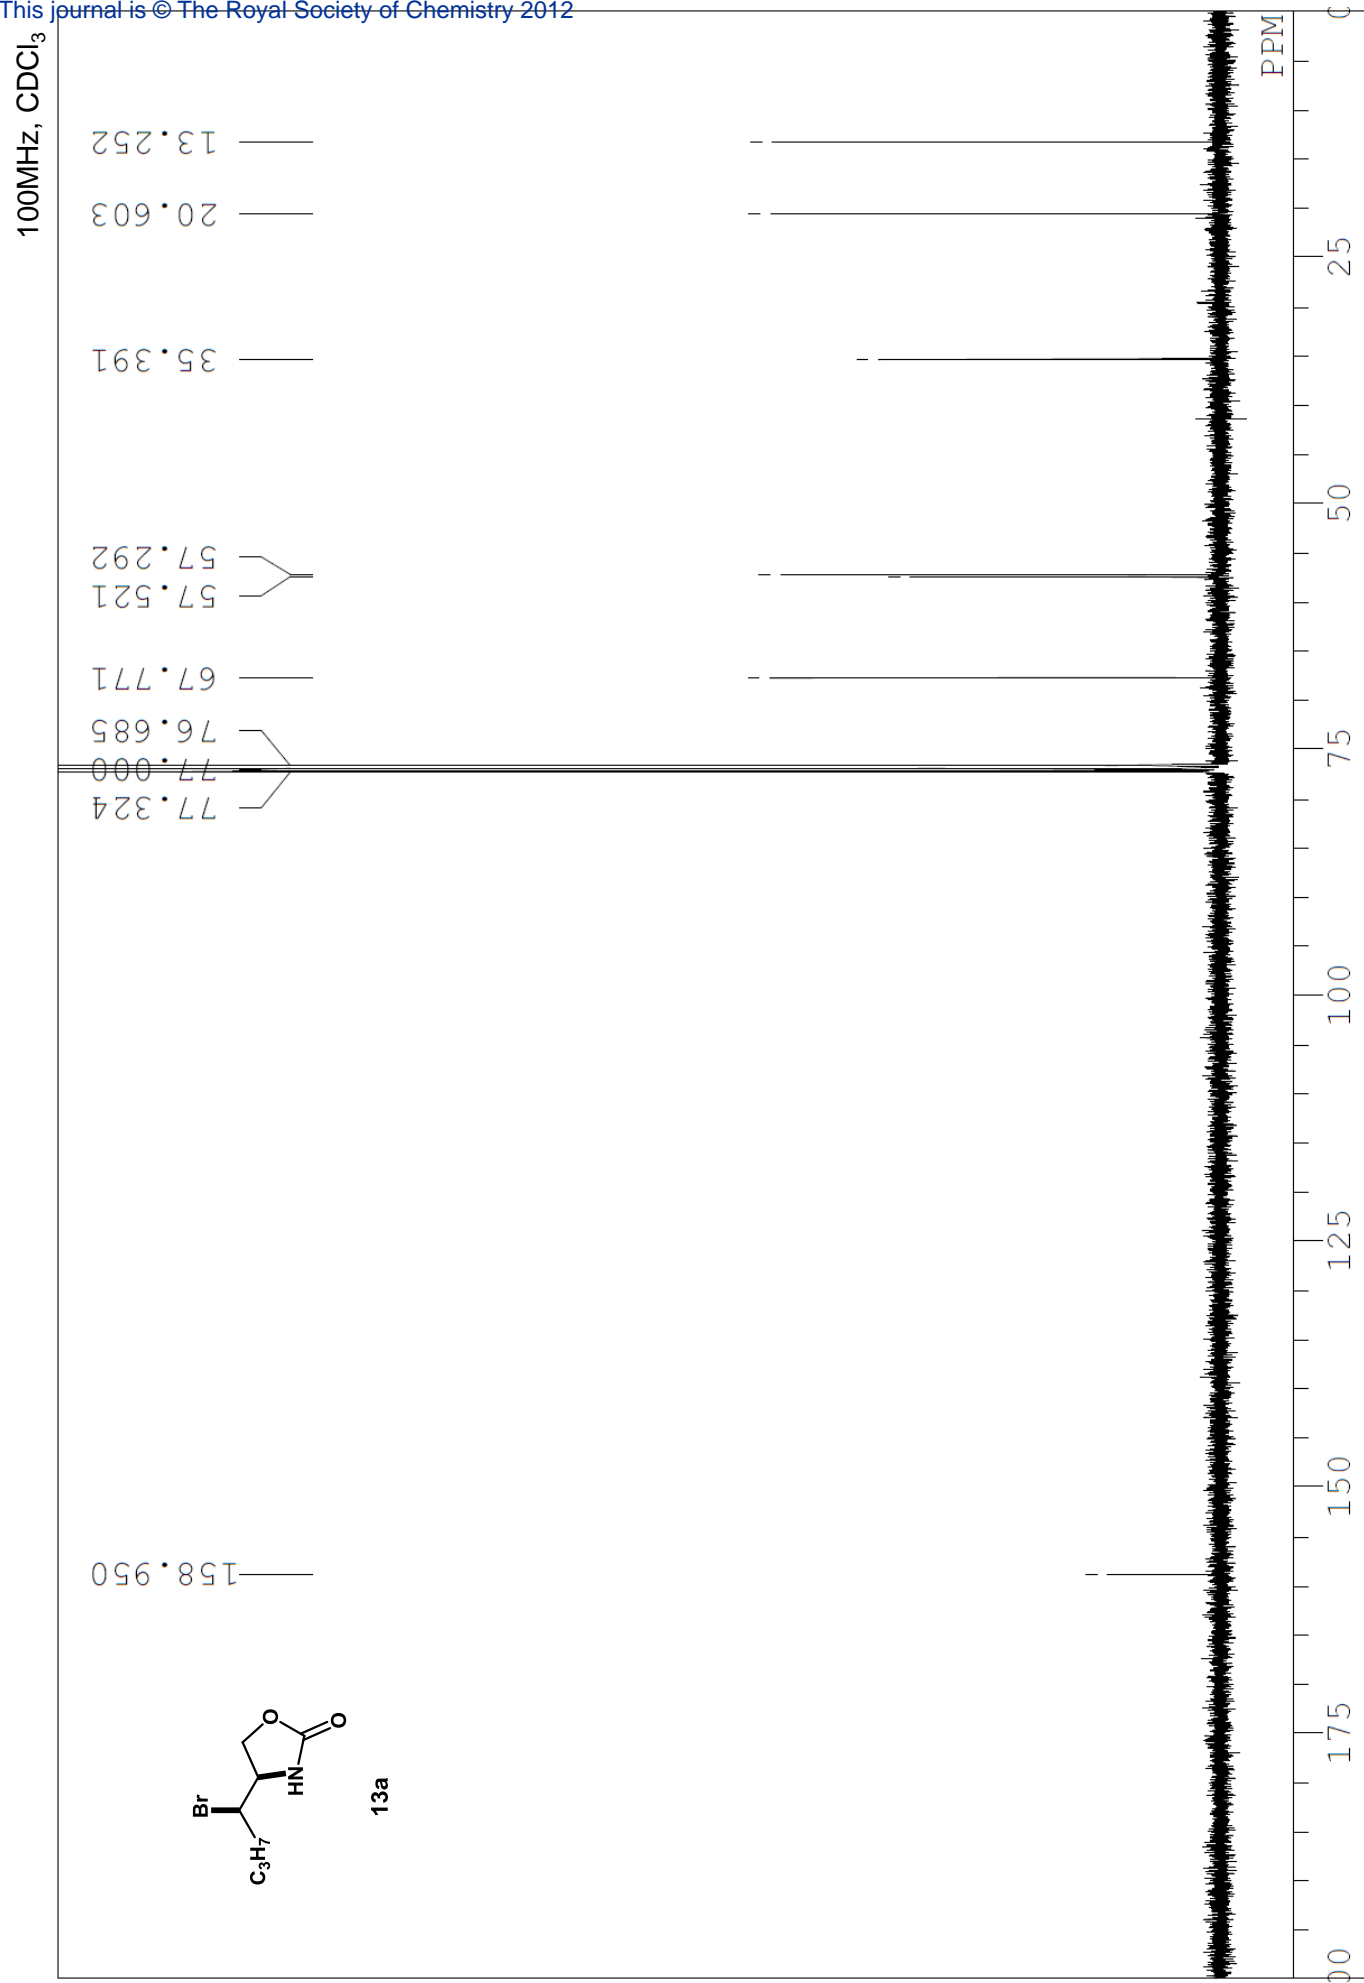

500MHz, CDCl<sub>3</sub>

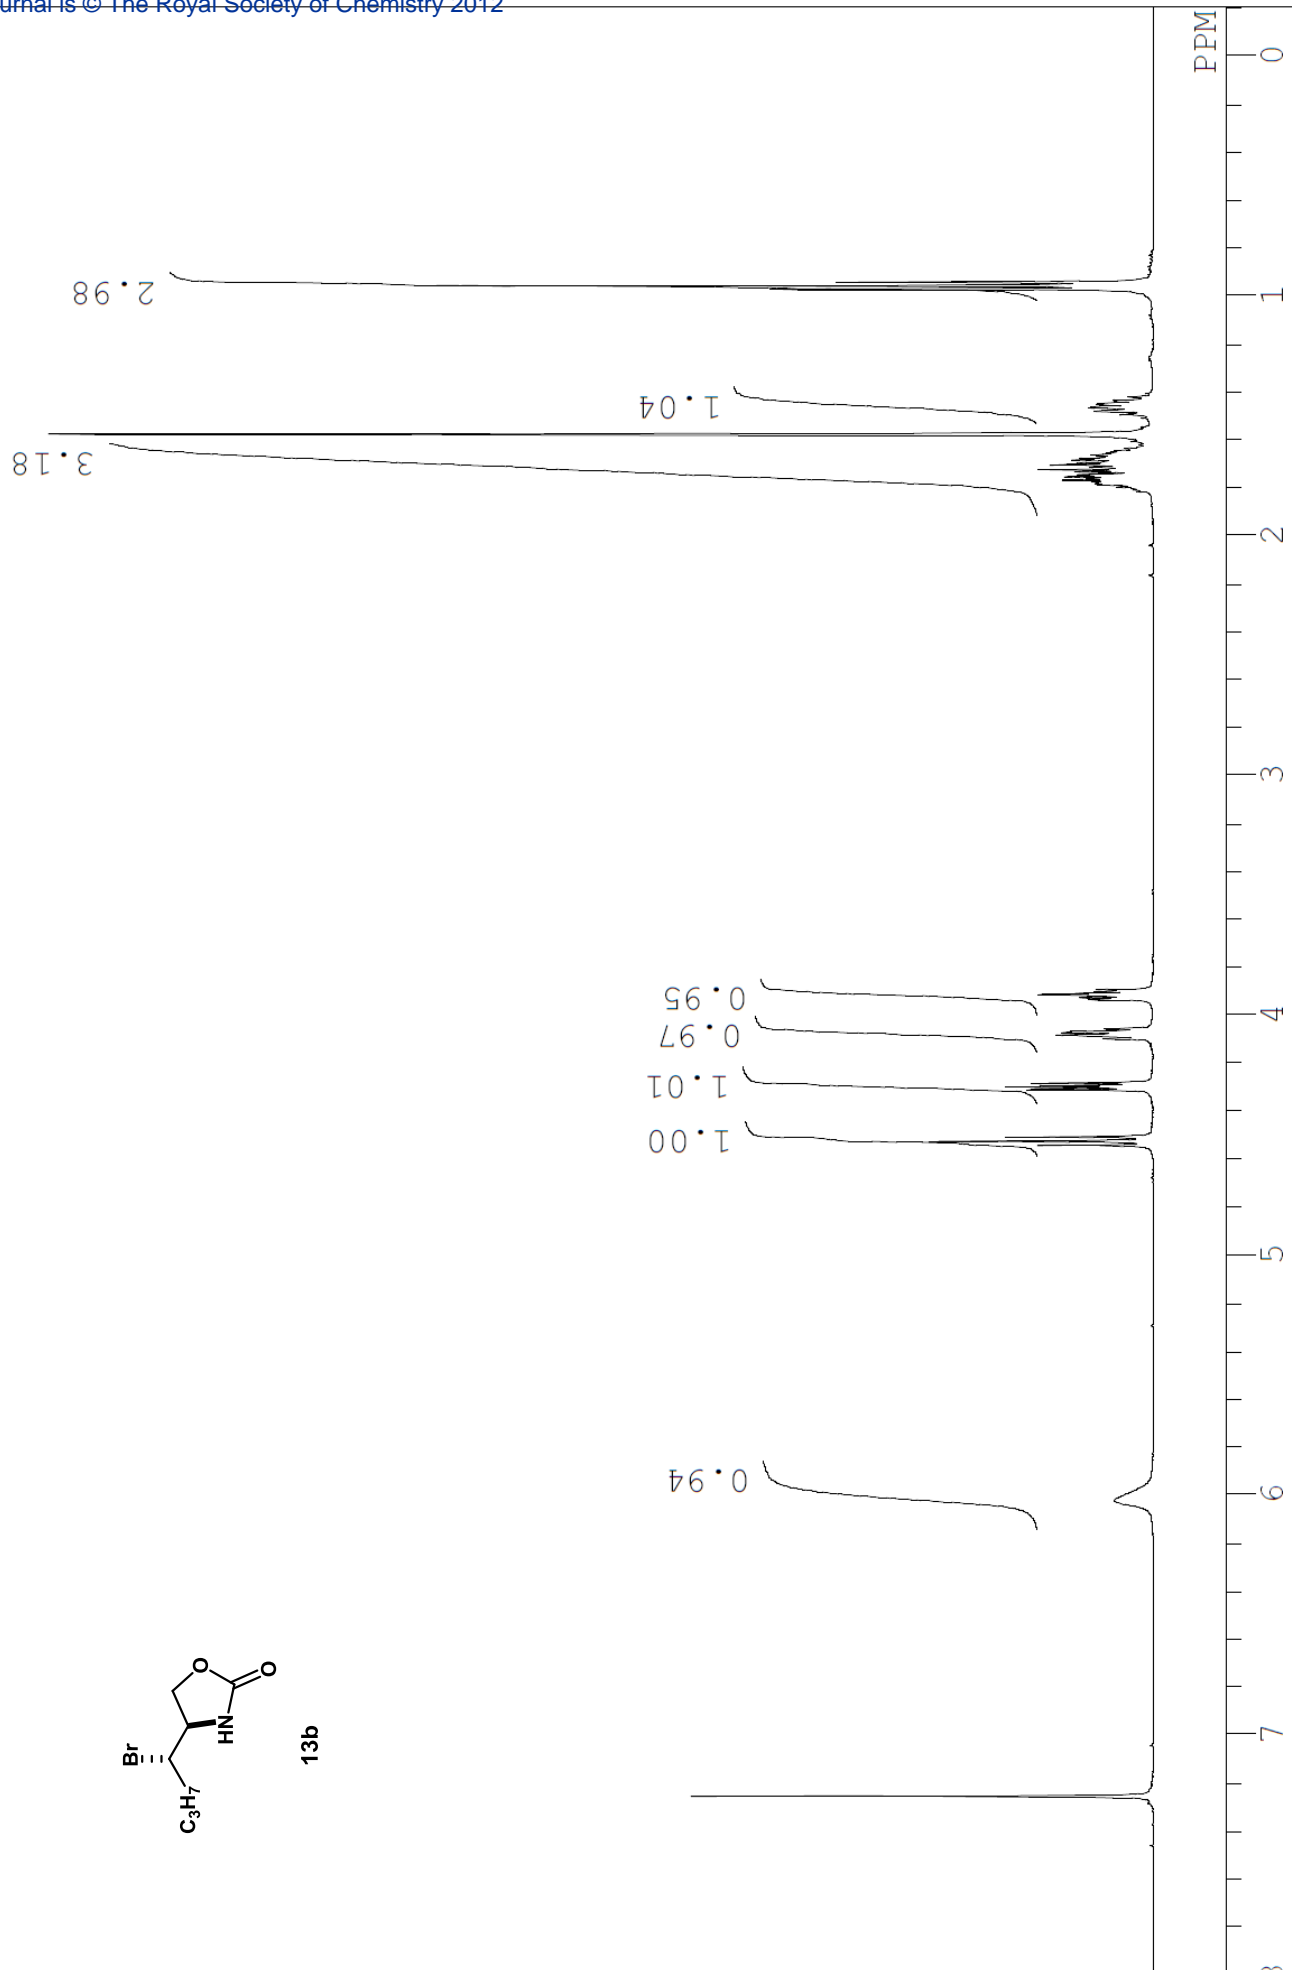



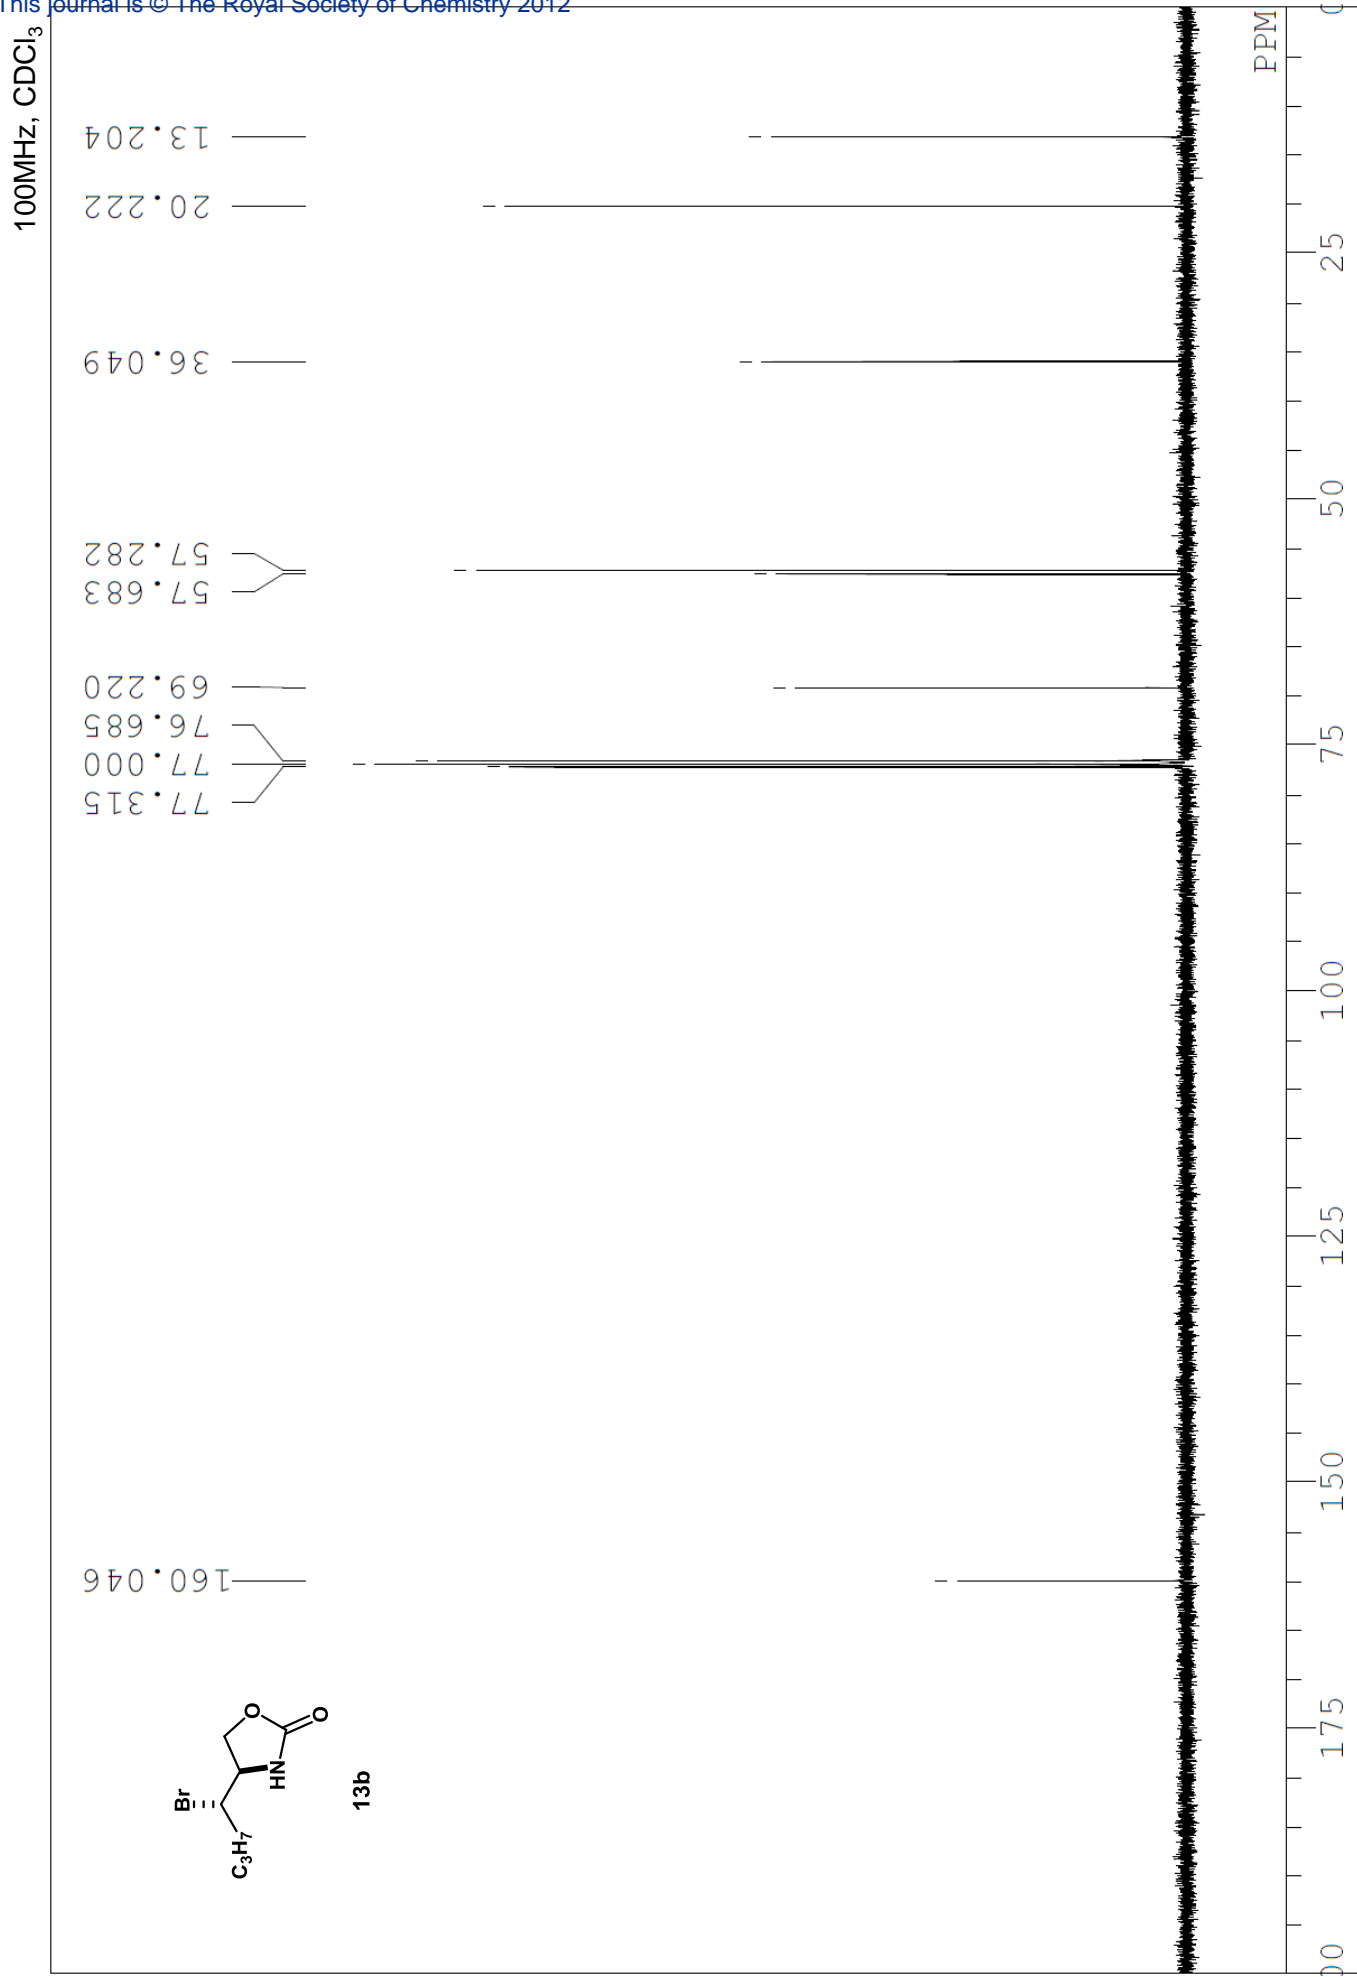

300MHz, CDCl<sub>3</sub>

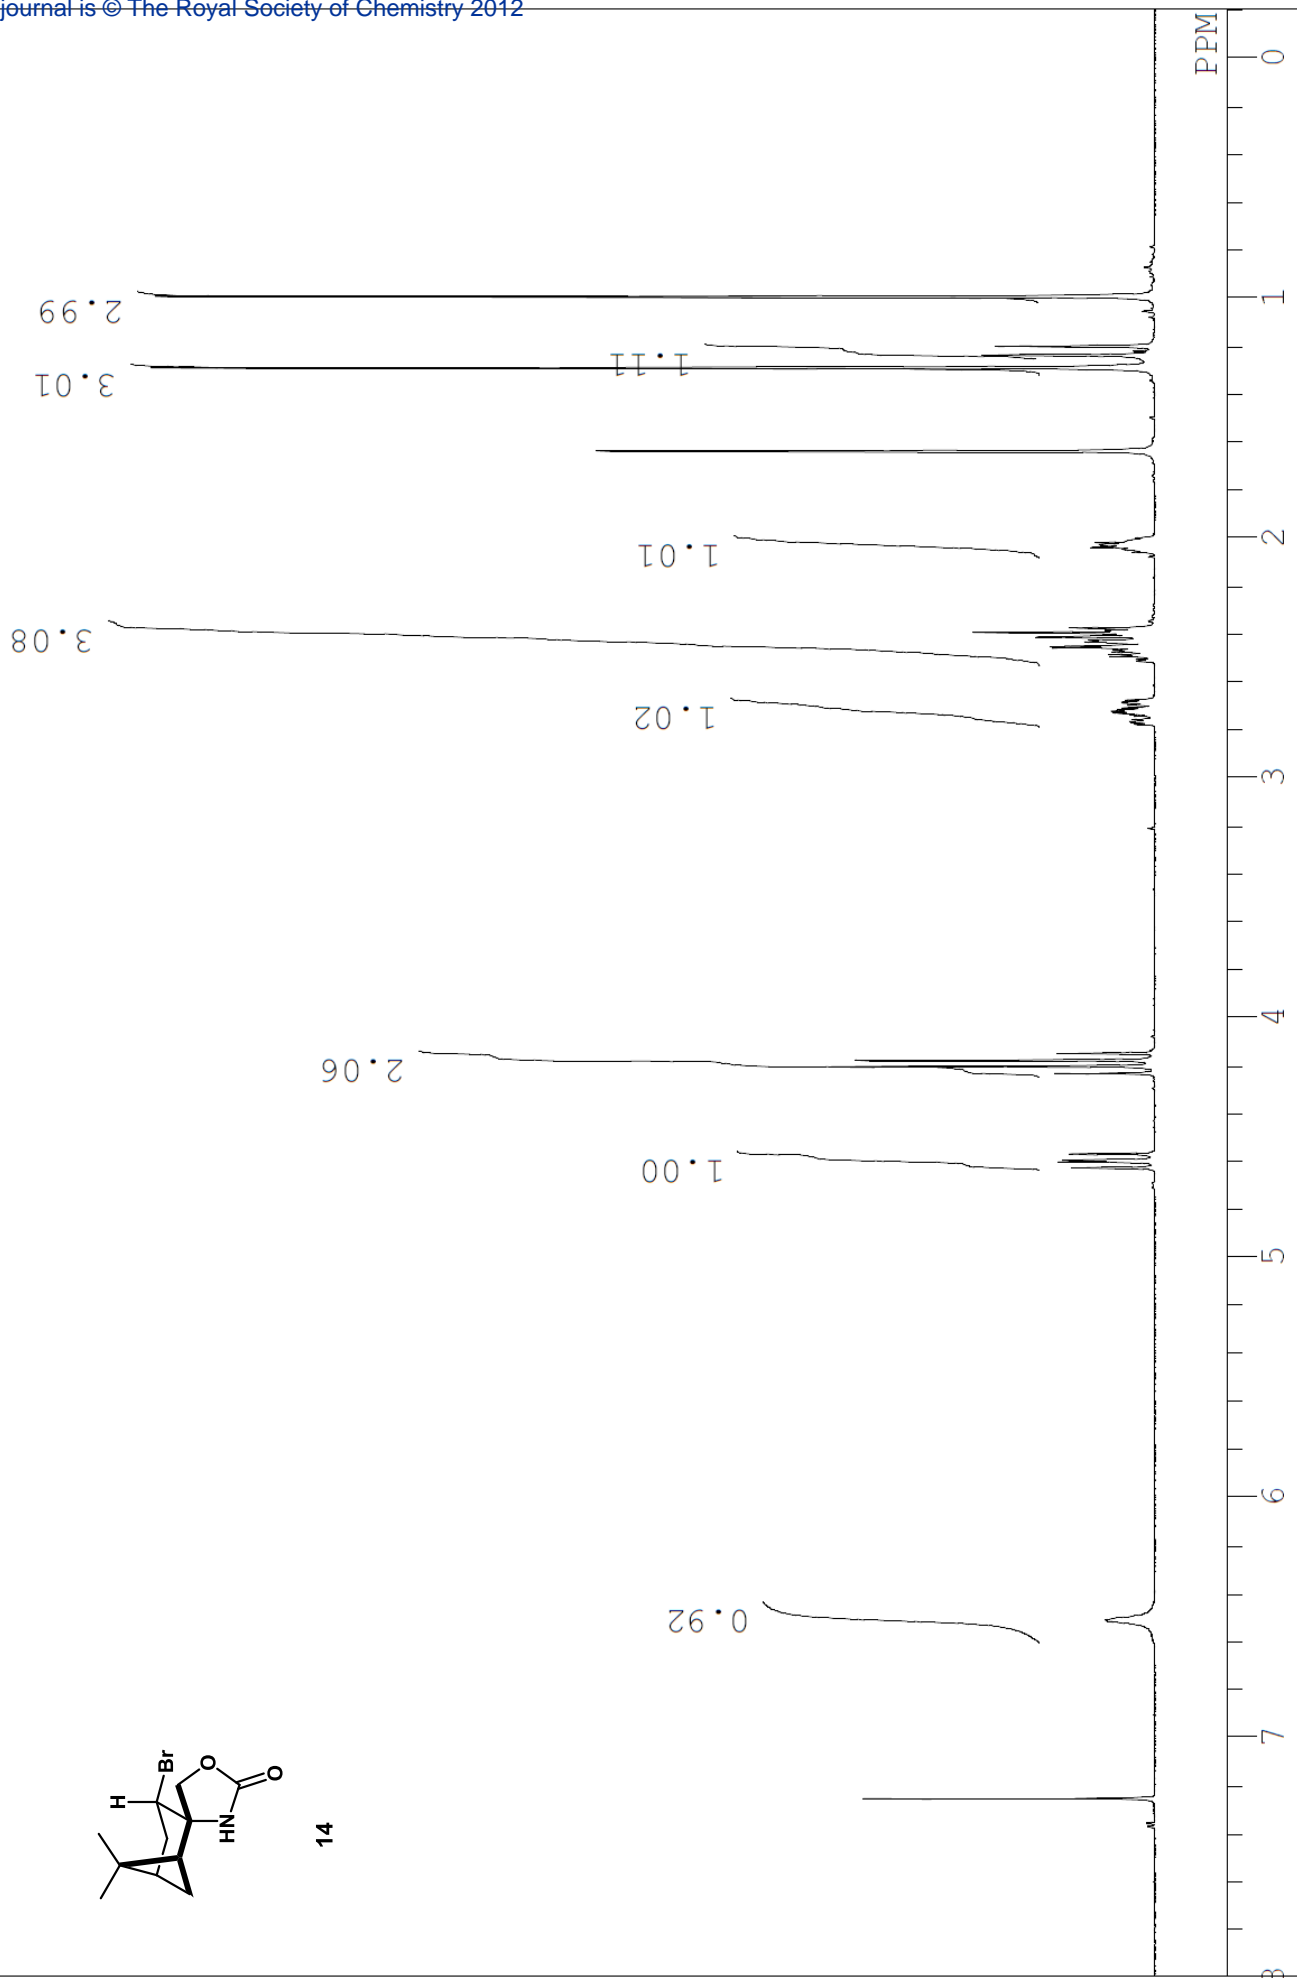

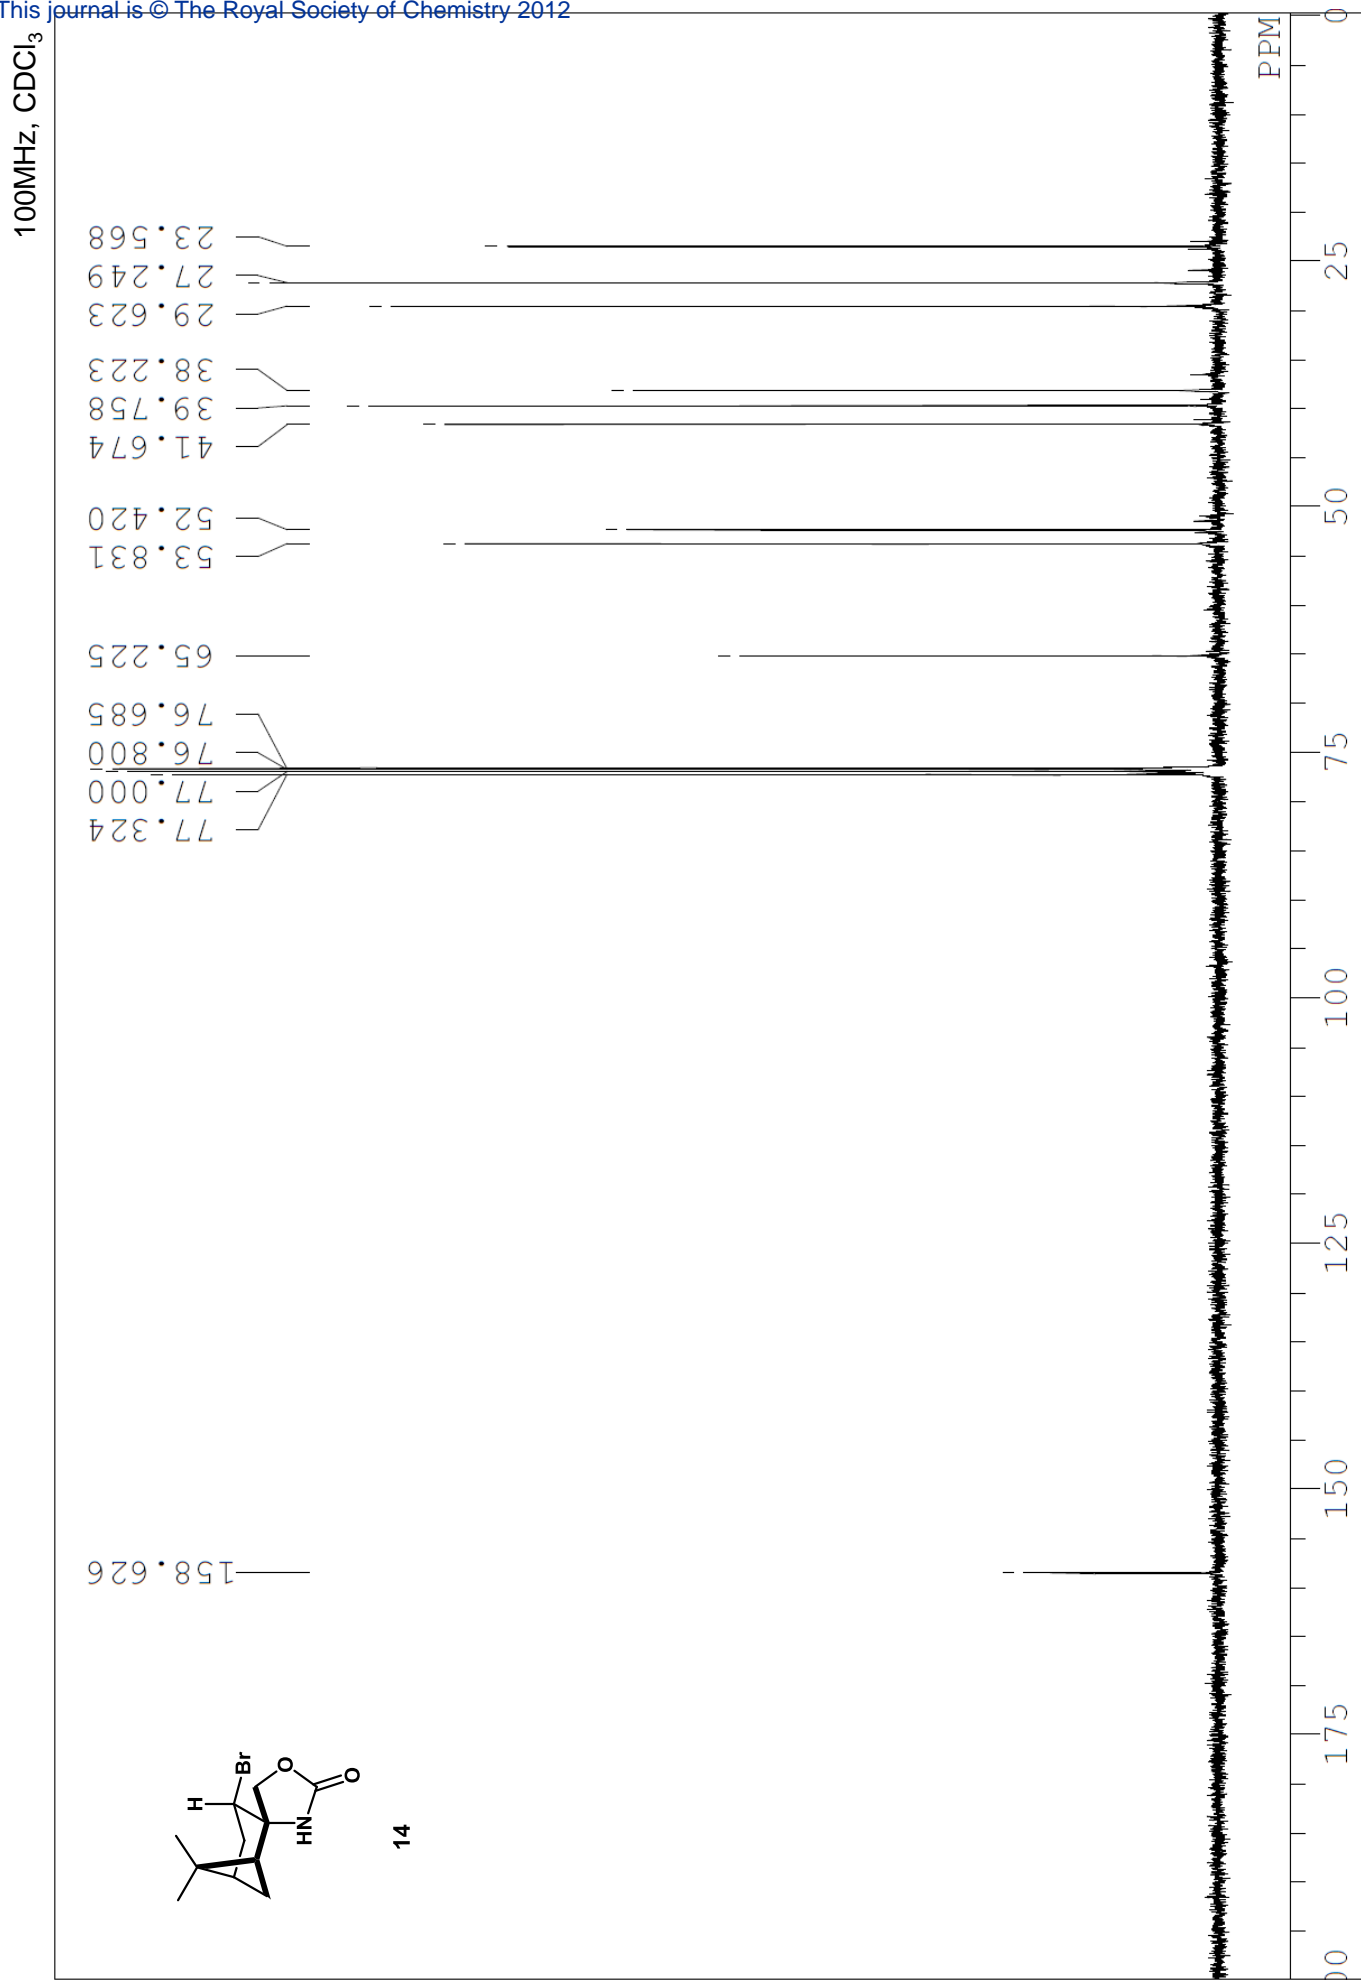

500MHz, CDCl<sub>3</sub>

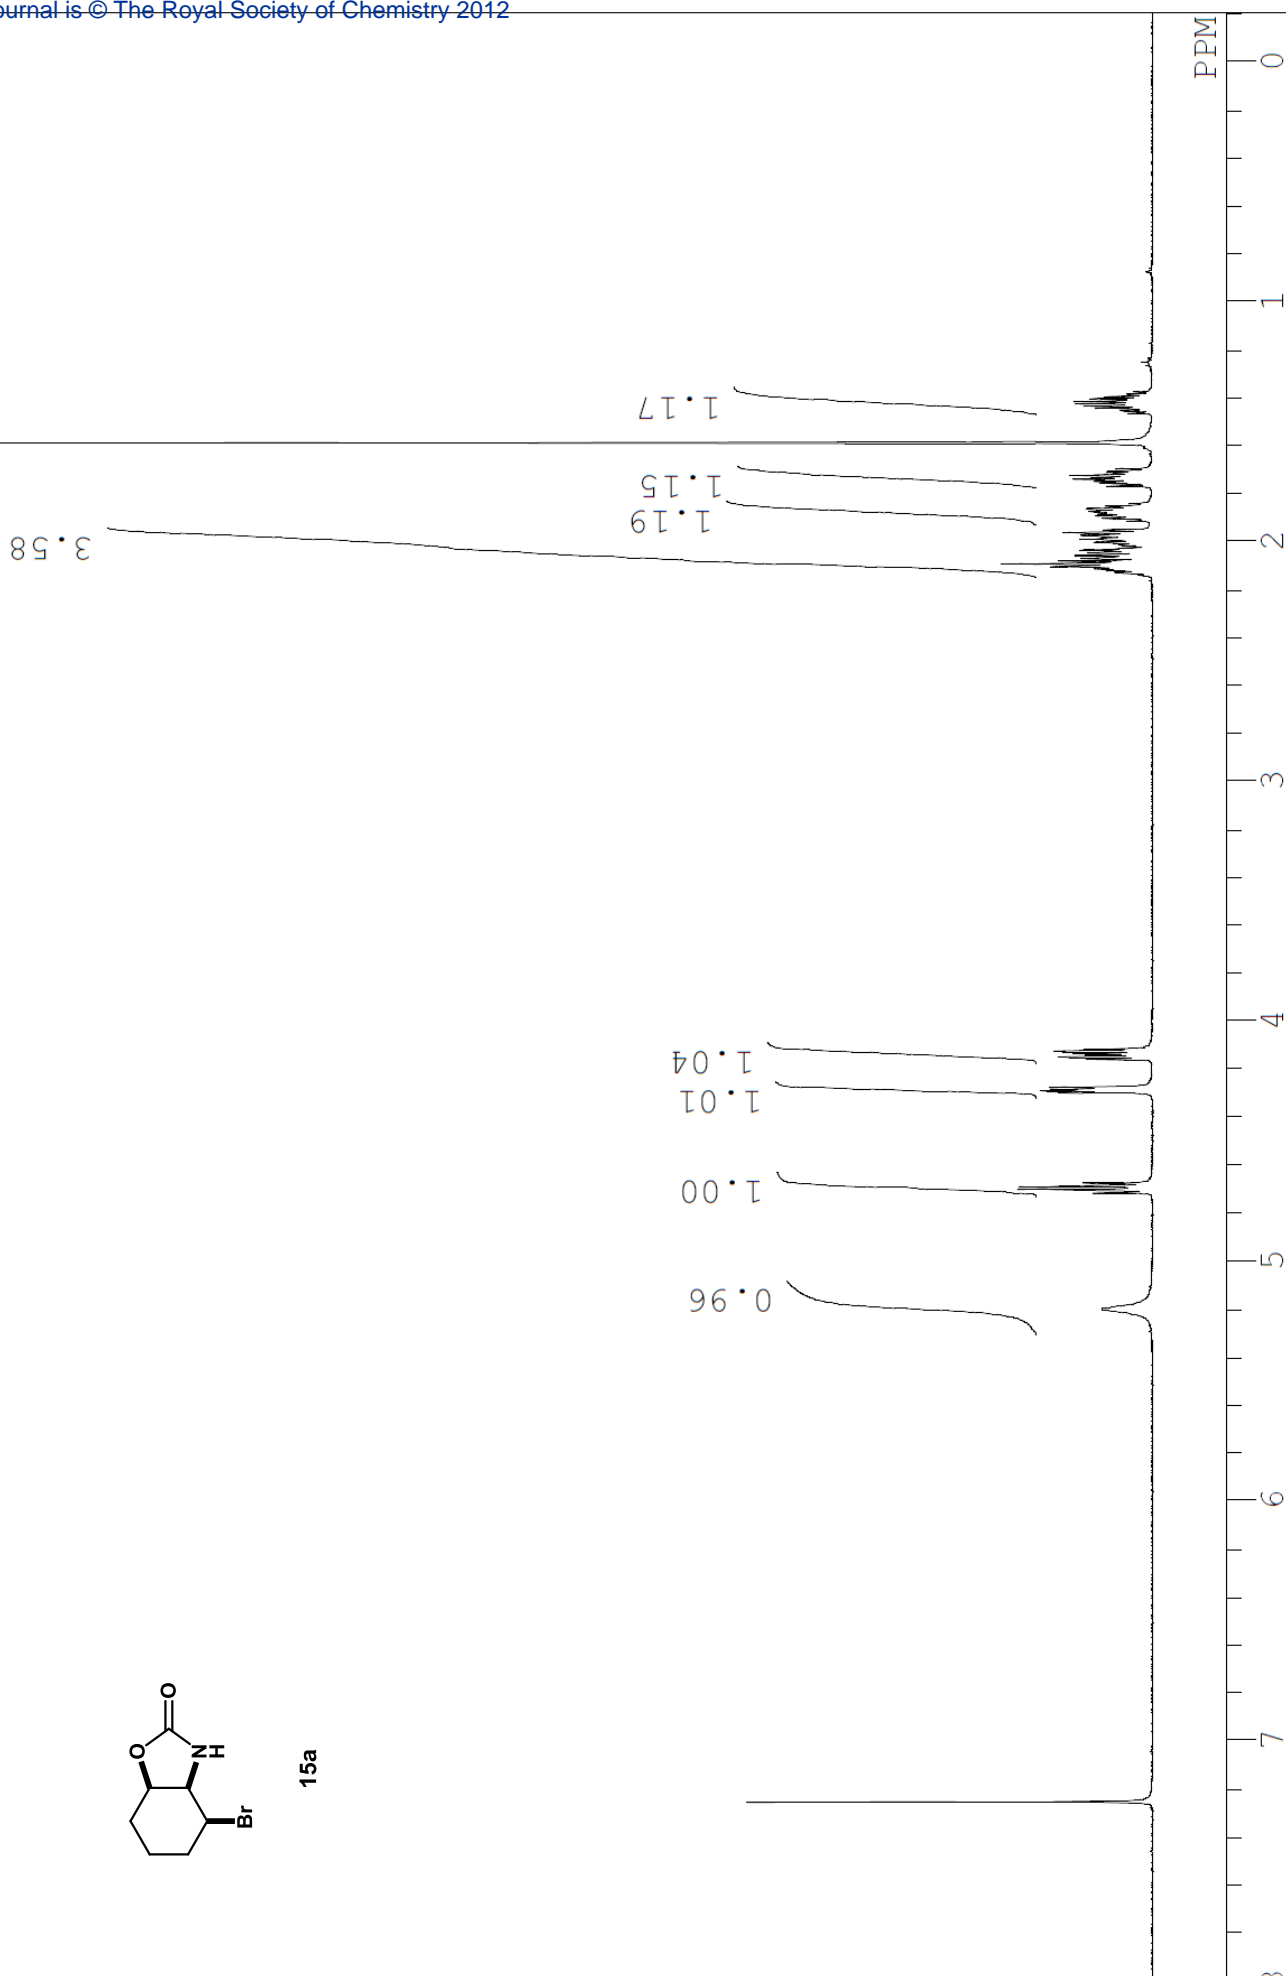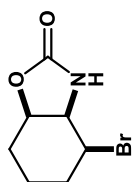

15a

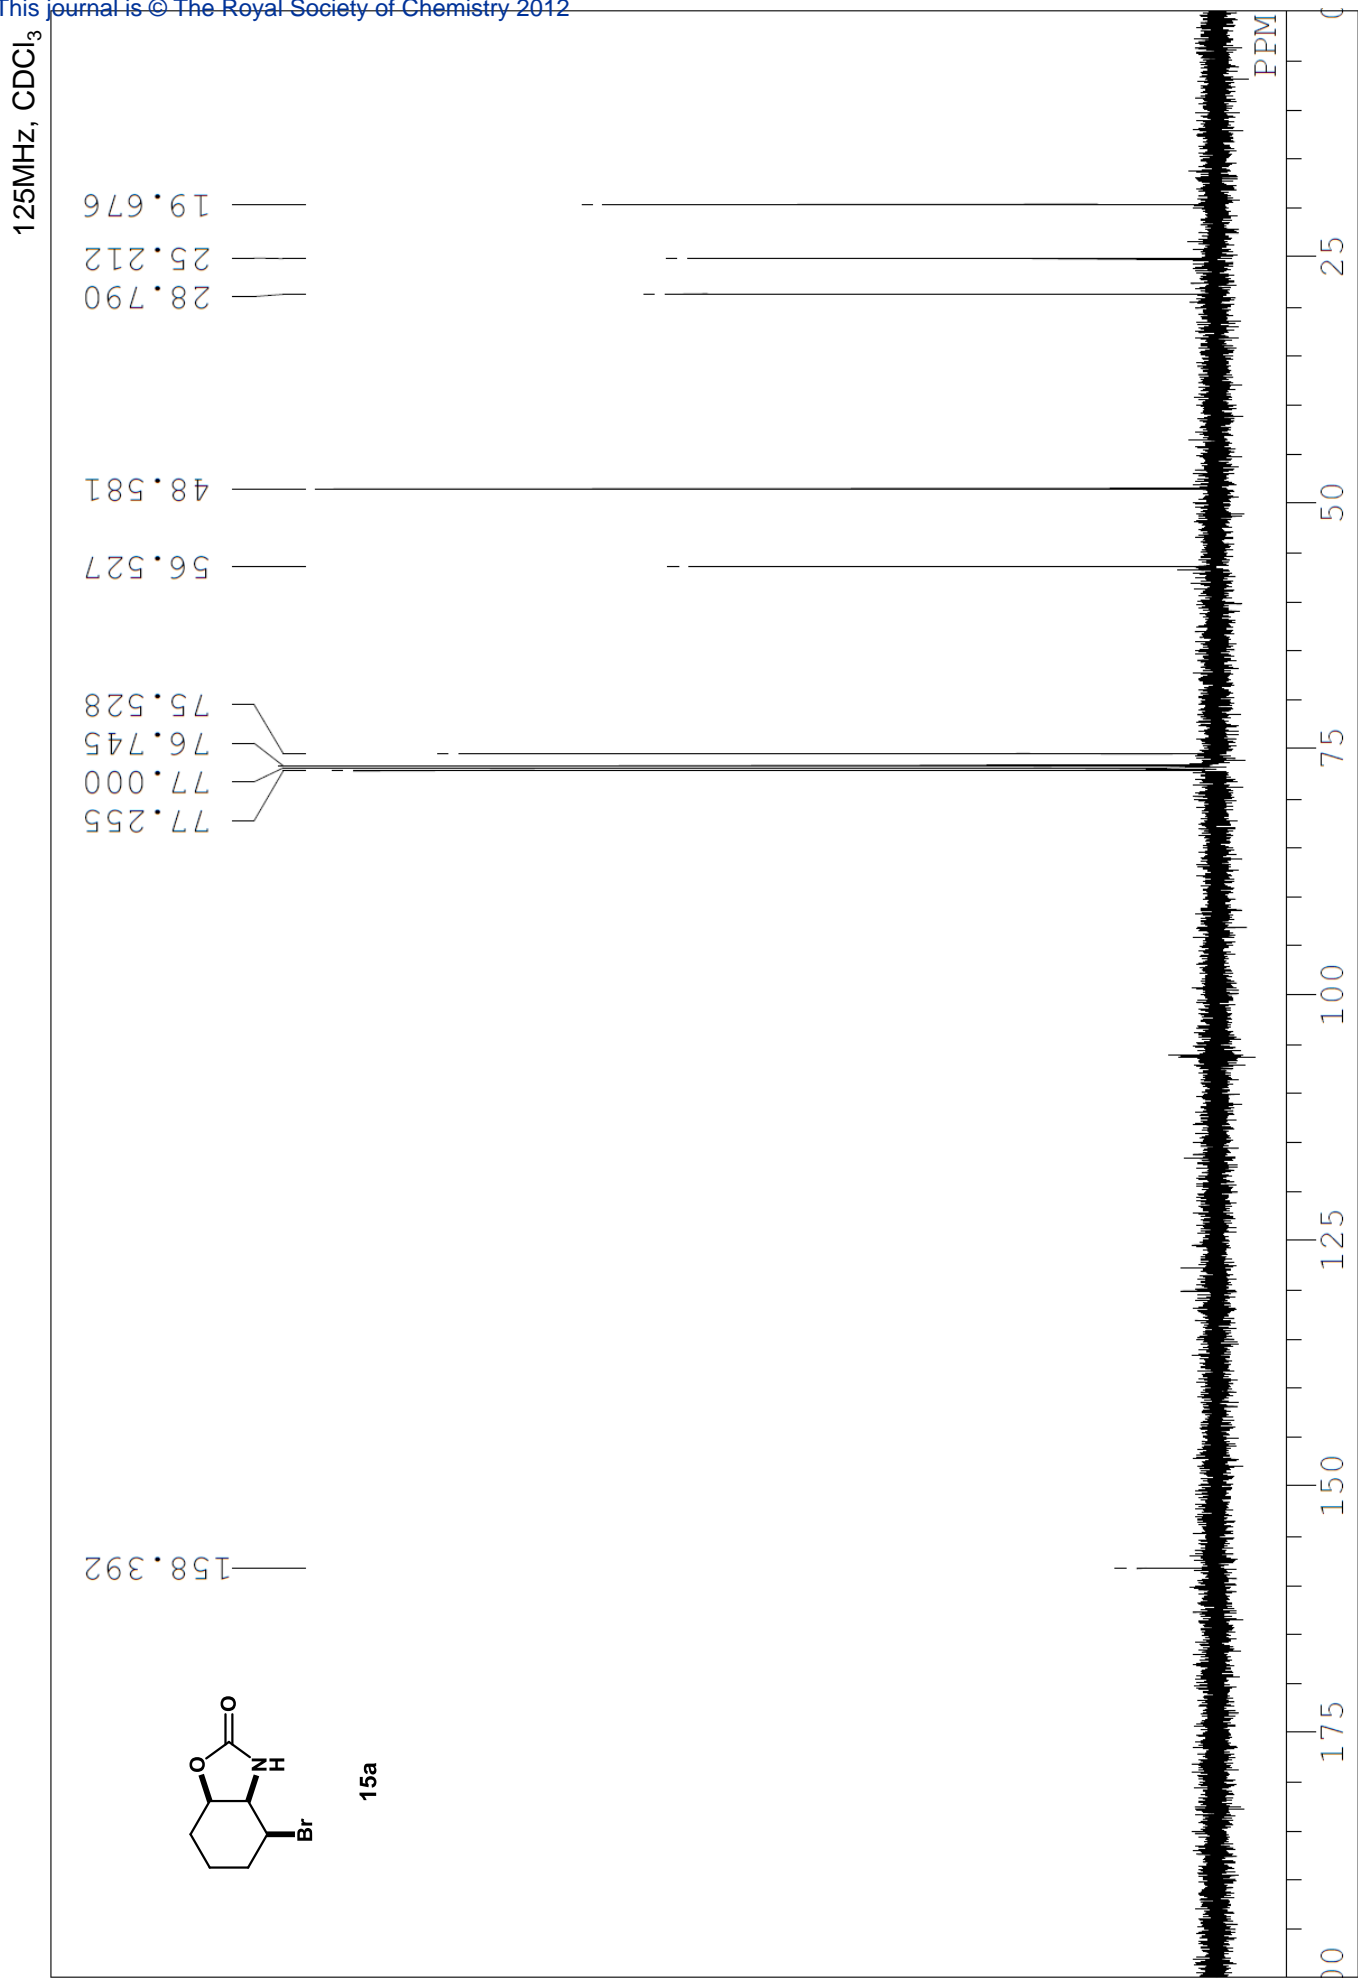

500MHz CDCl<sub>3</sub>

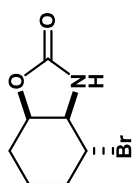

15b

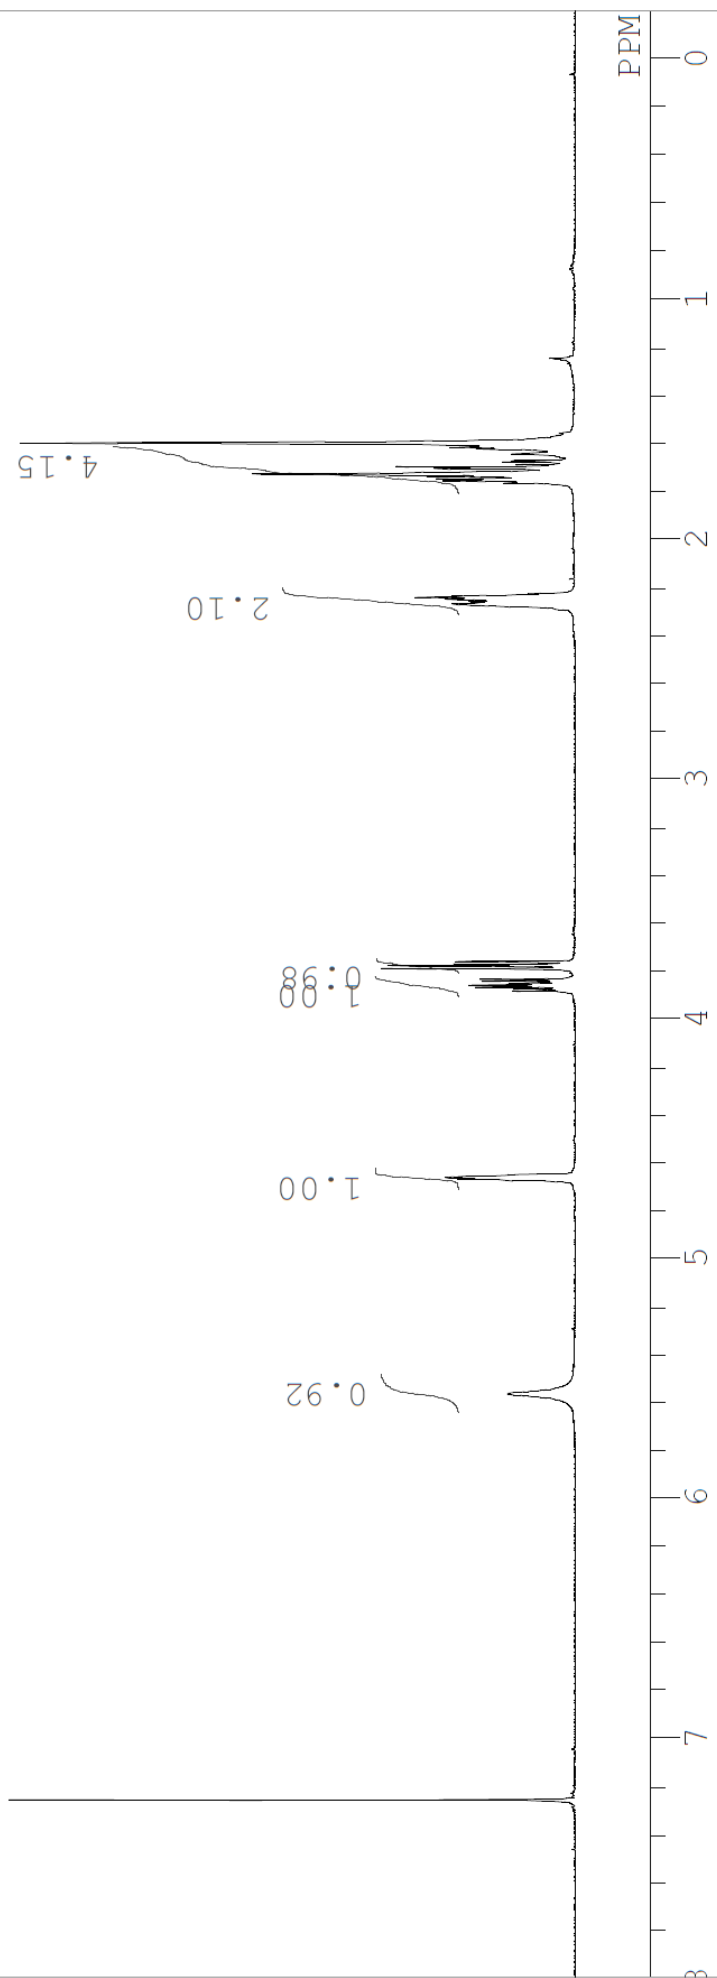

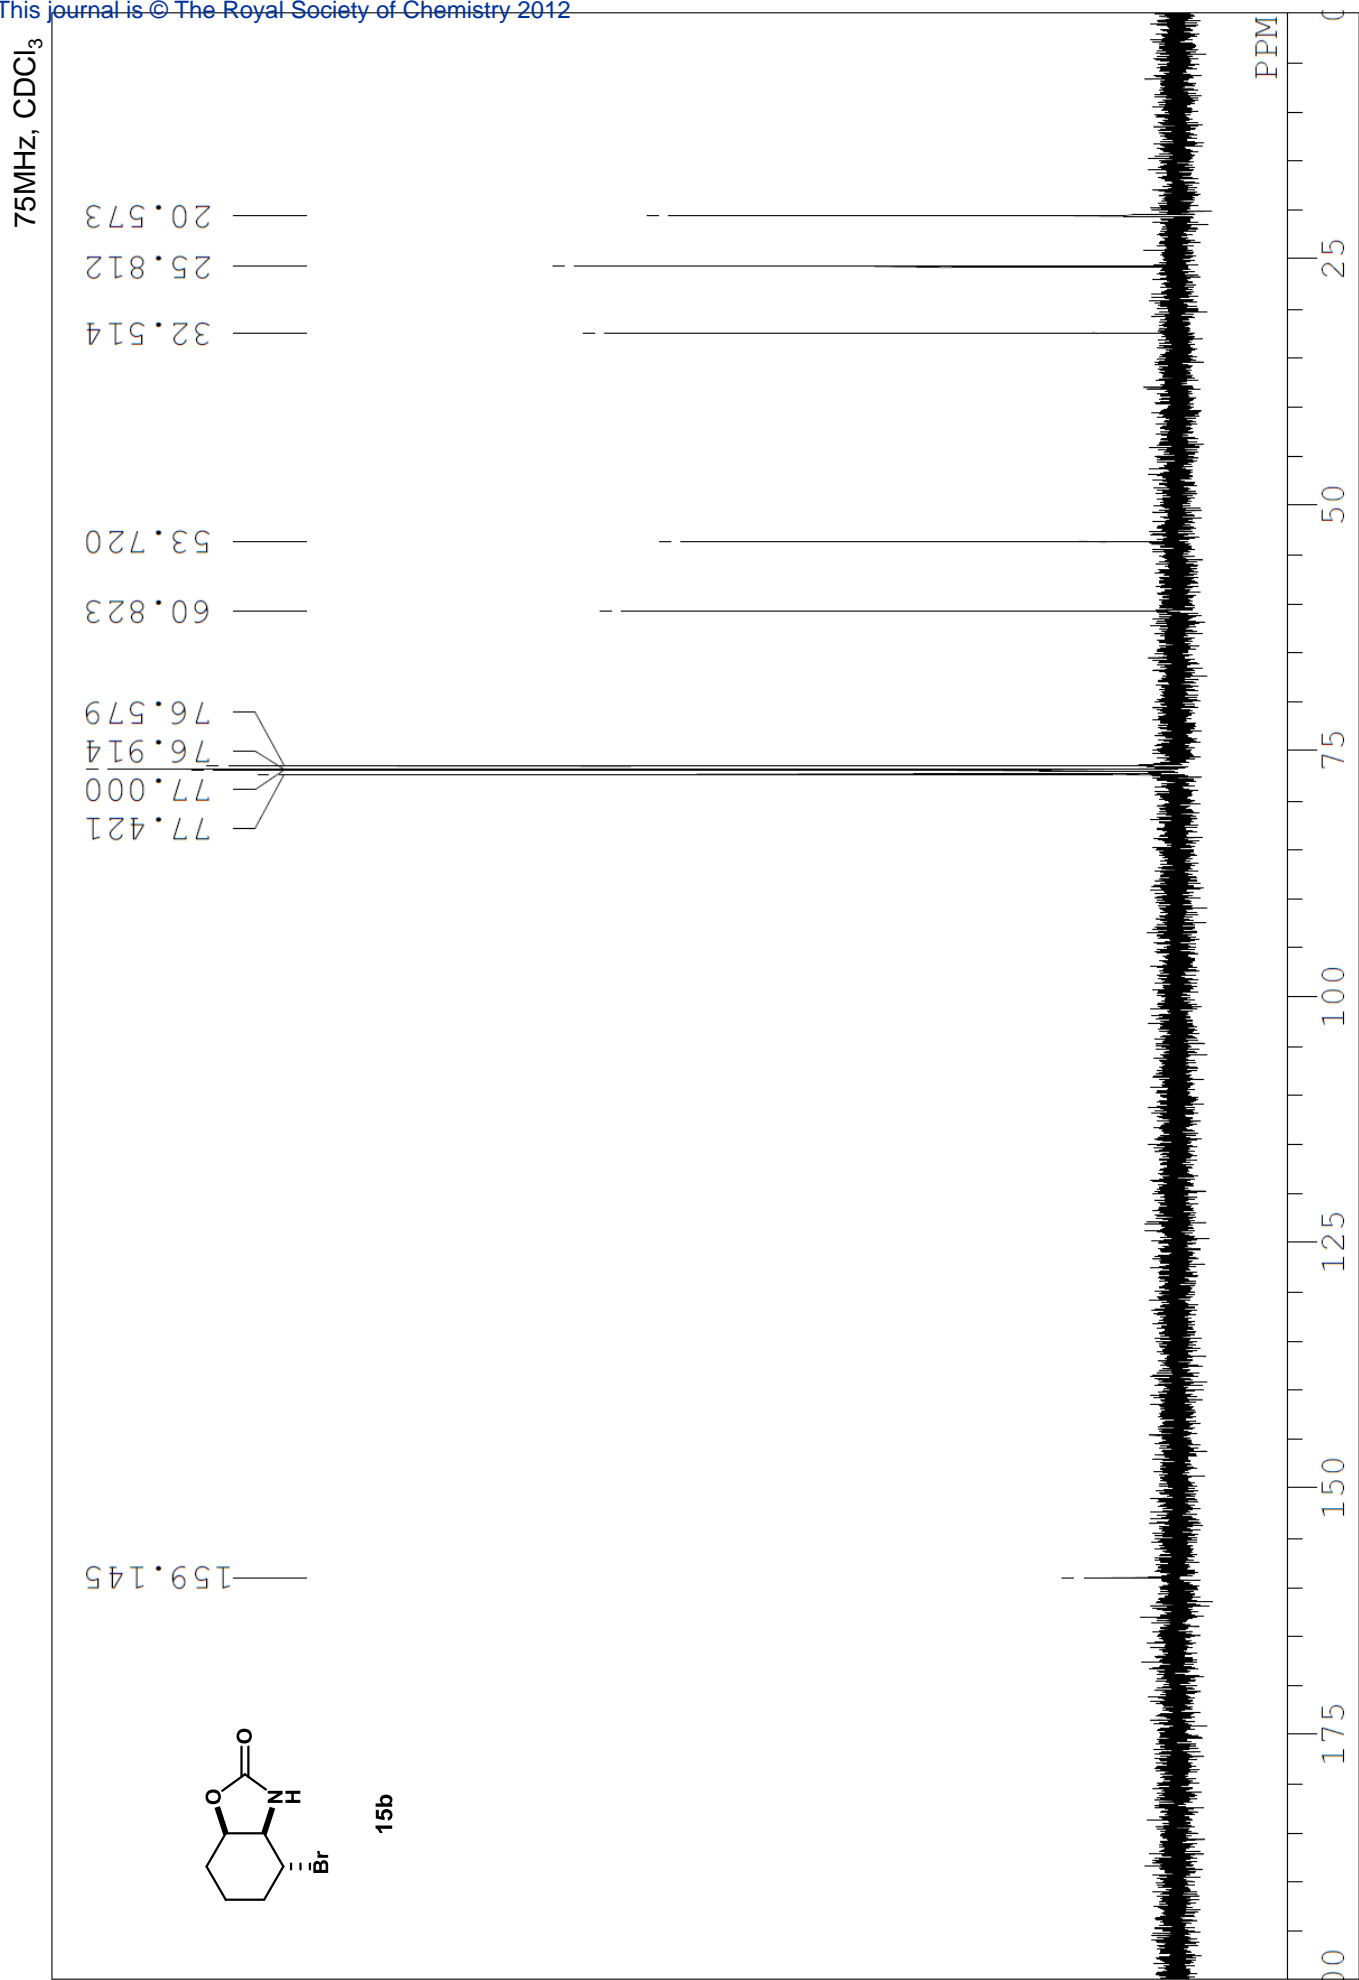



400MHz, CD<sub>3</sub>OD

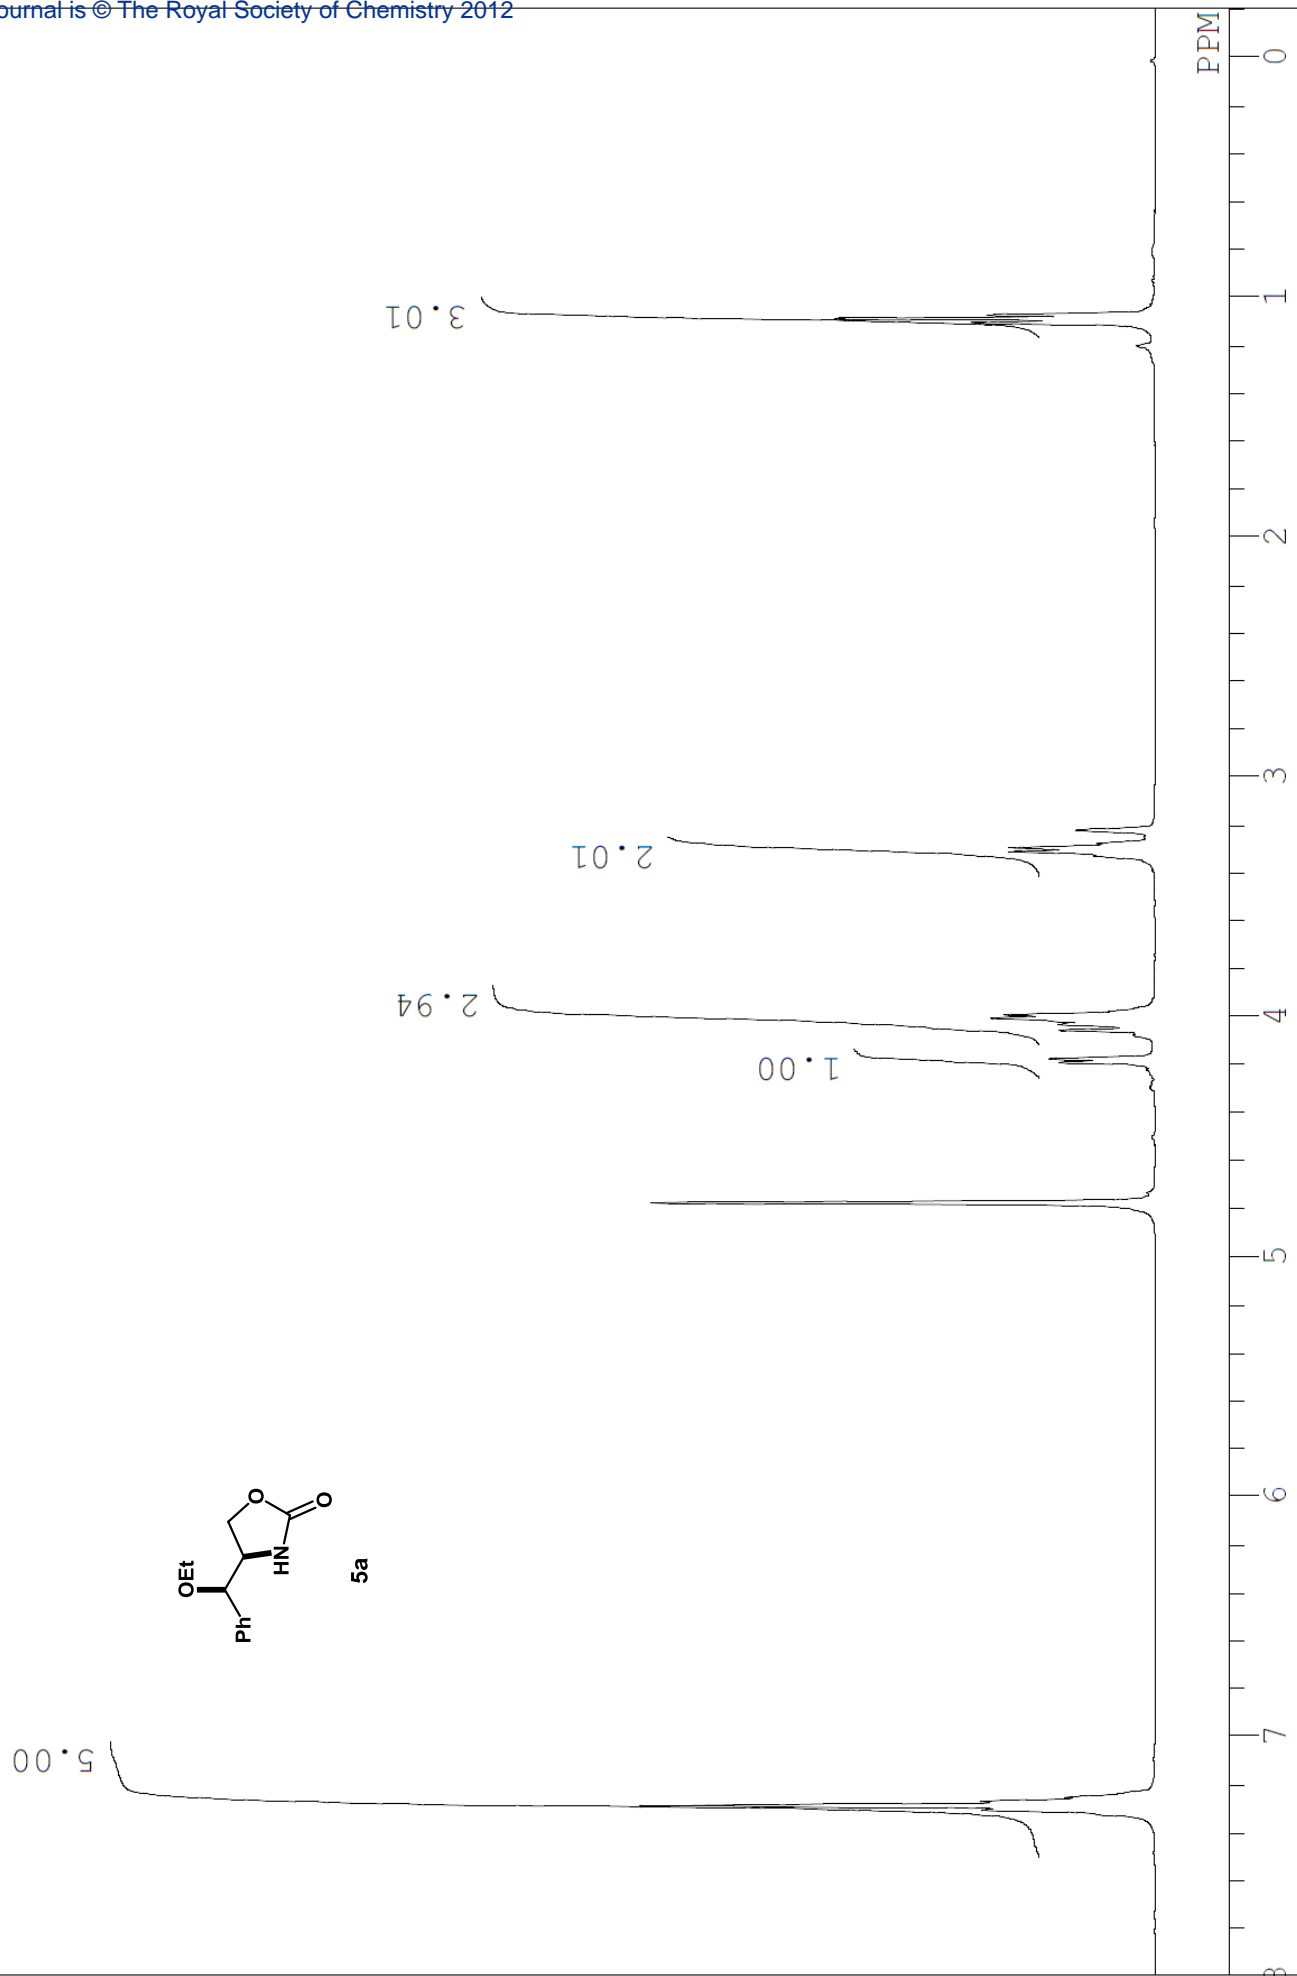

100MHz, CD<sub>3</sub>OD

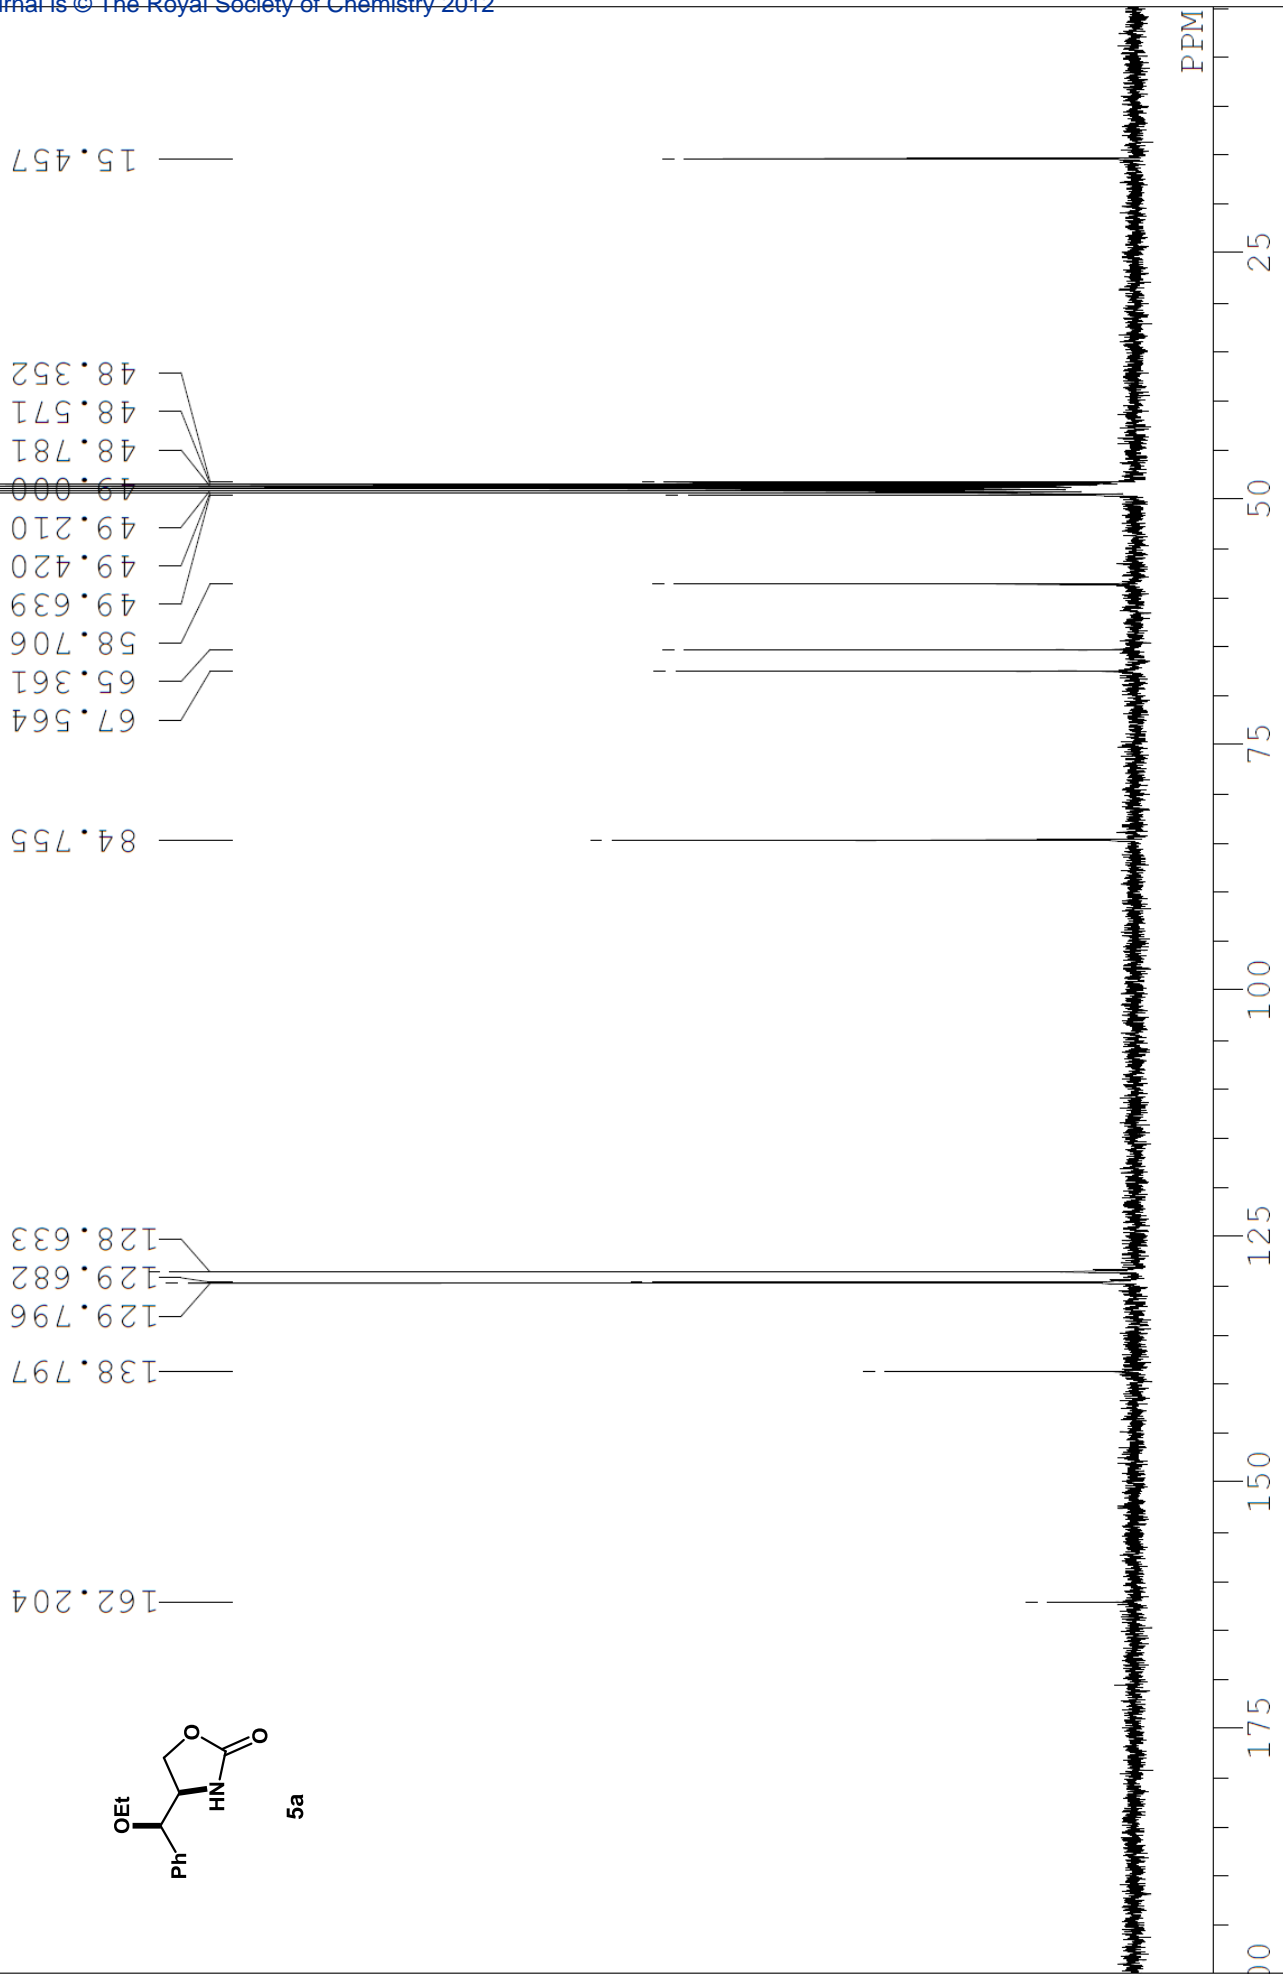

400MHz, CDCl<sub>3</sub>

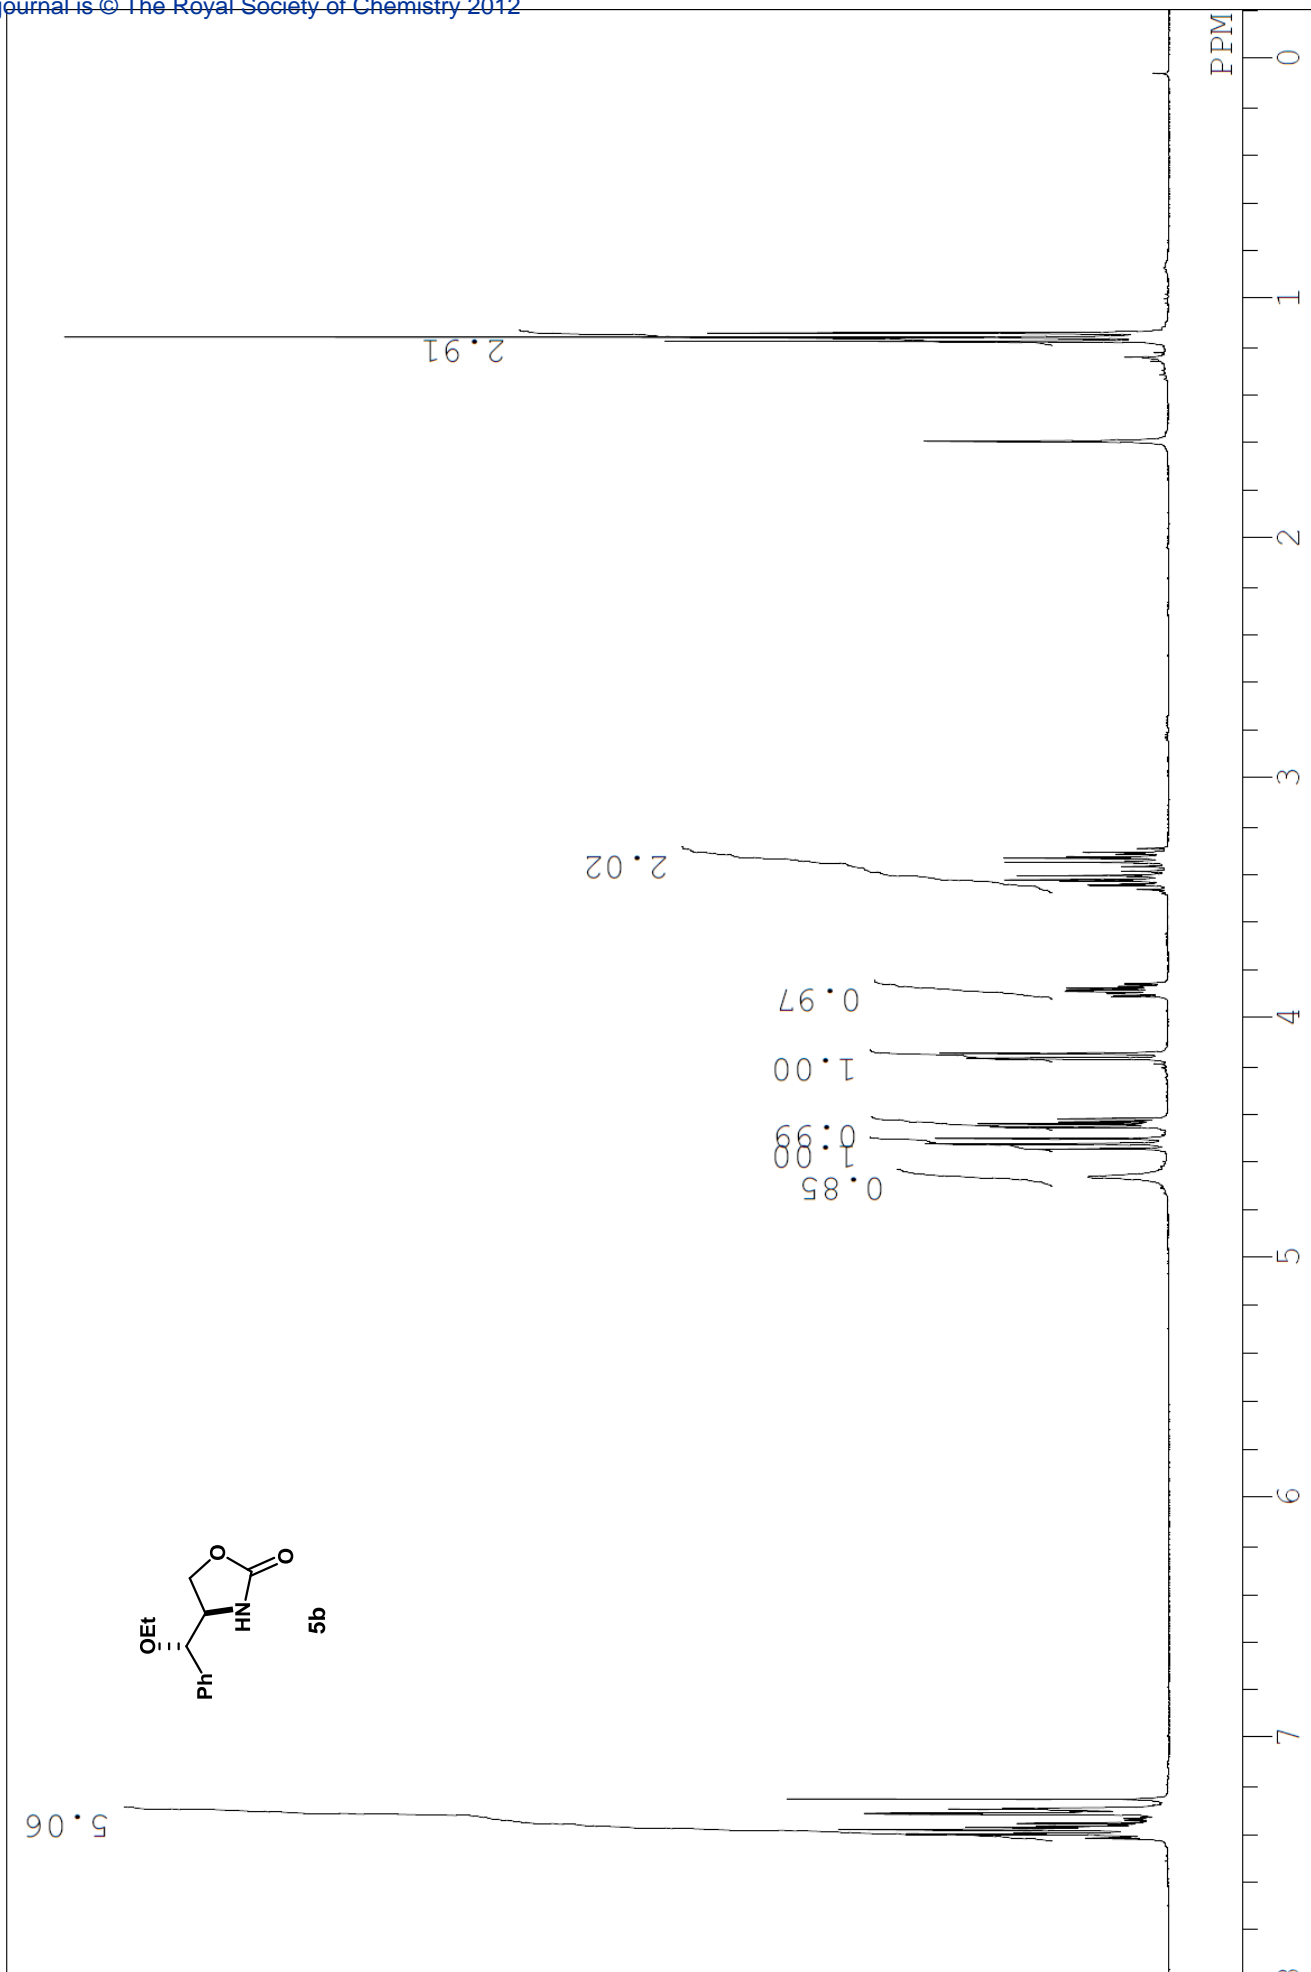

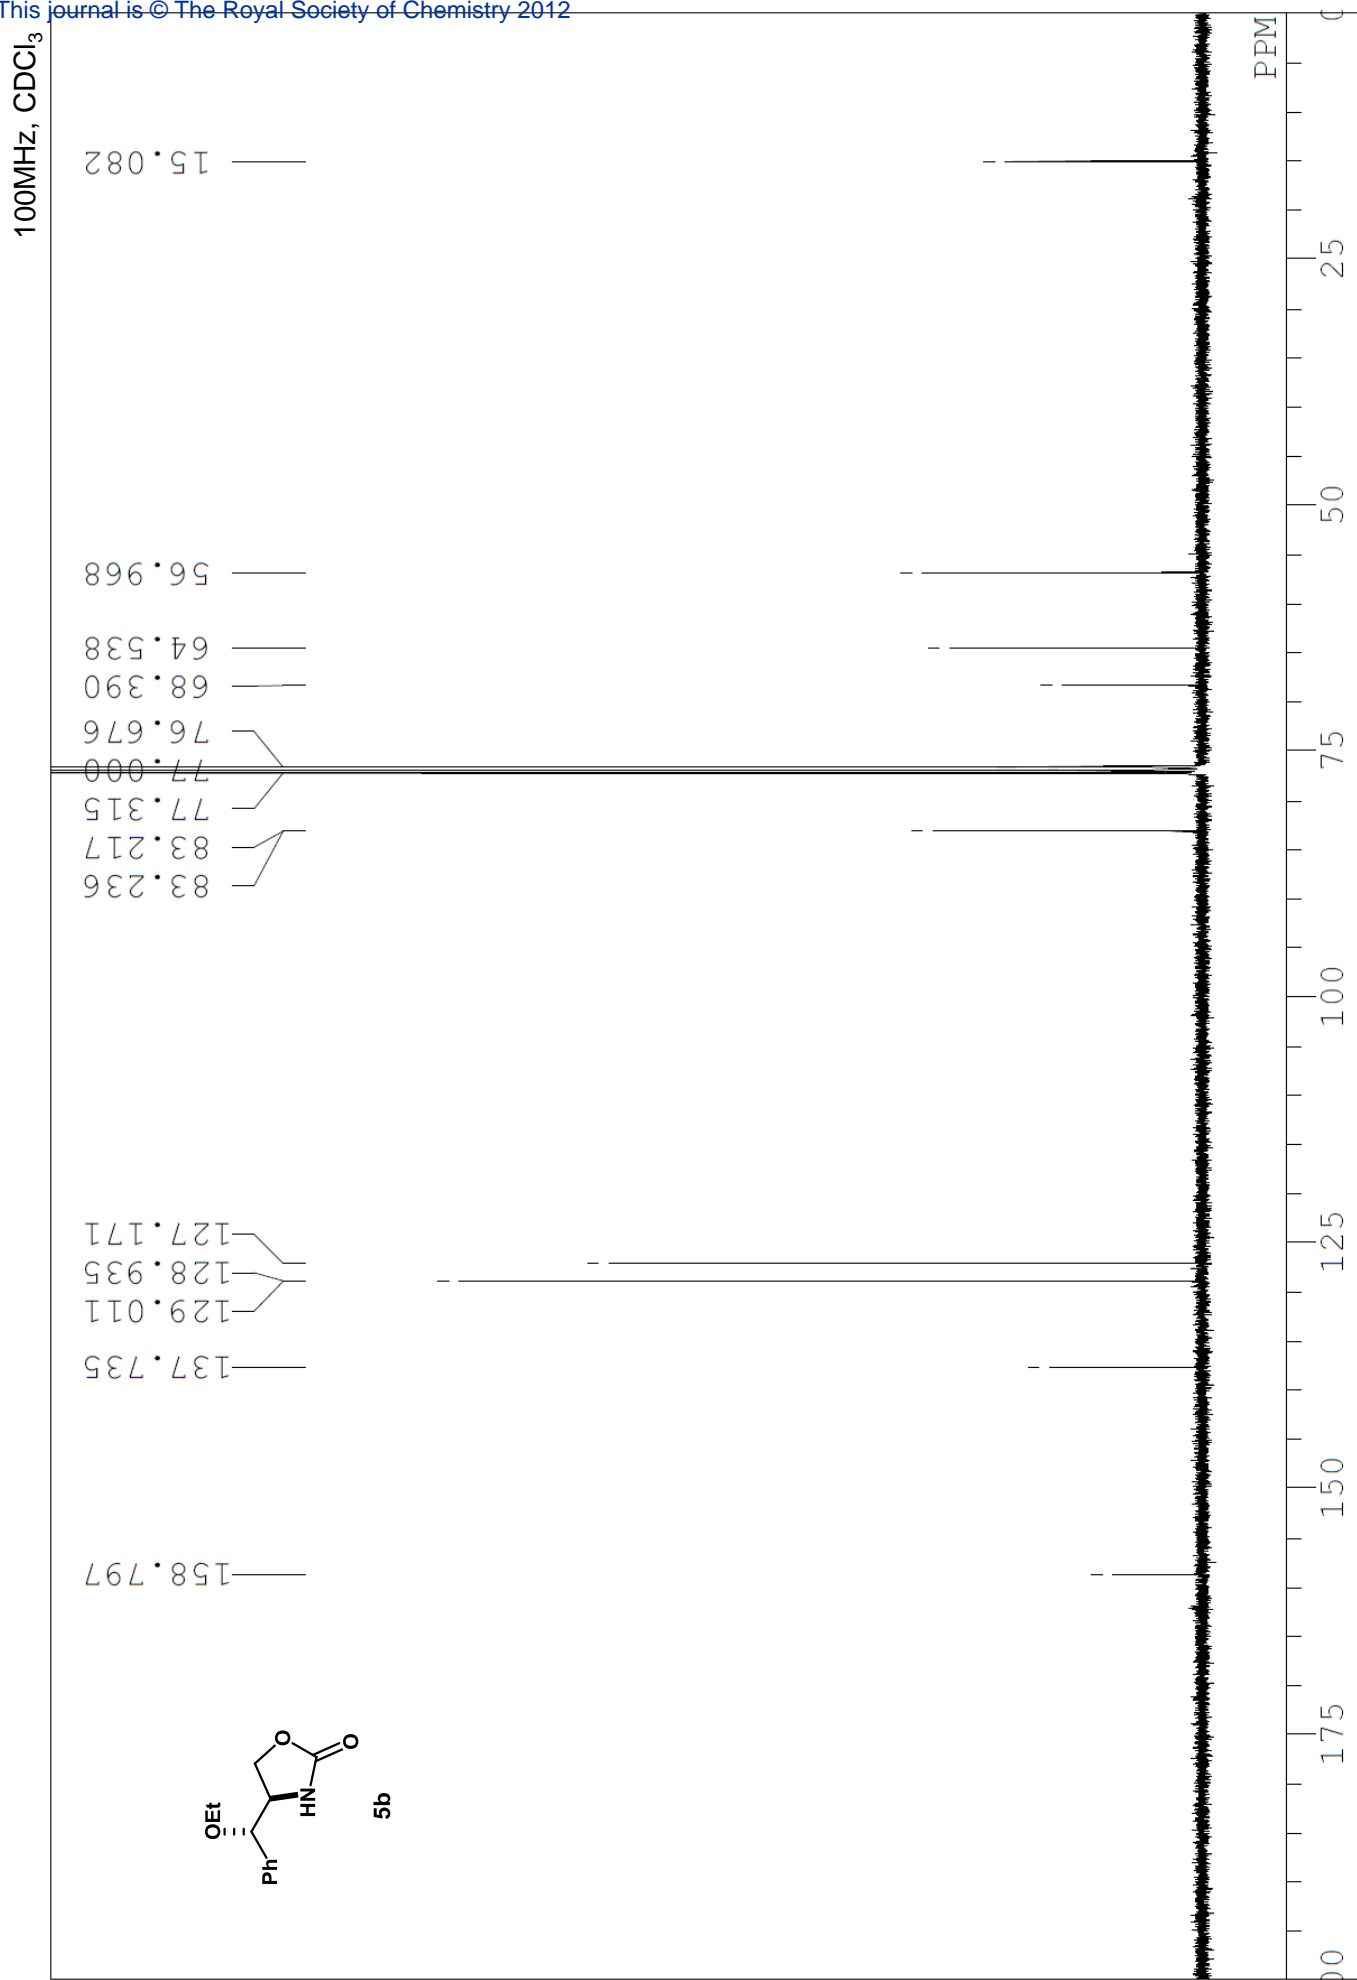

400MHz, CDCl<sub>3</sub>

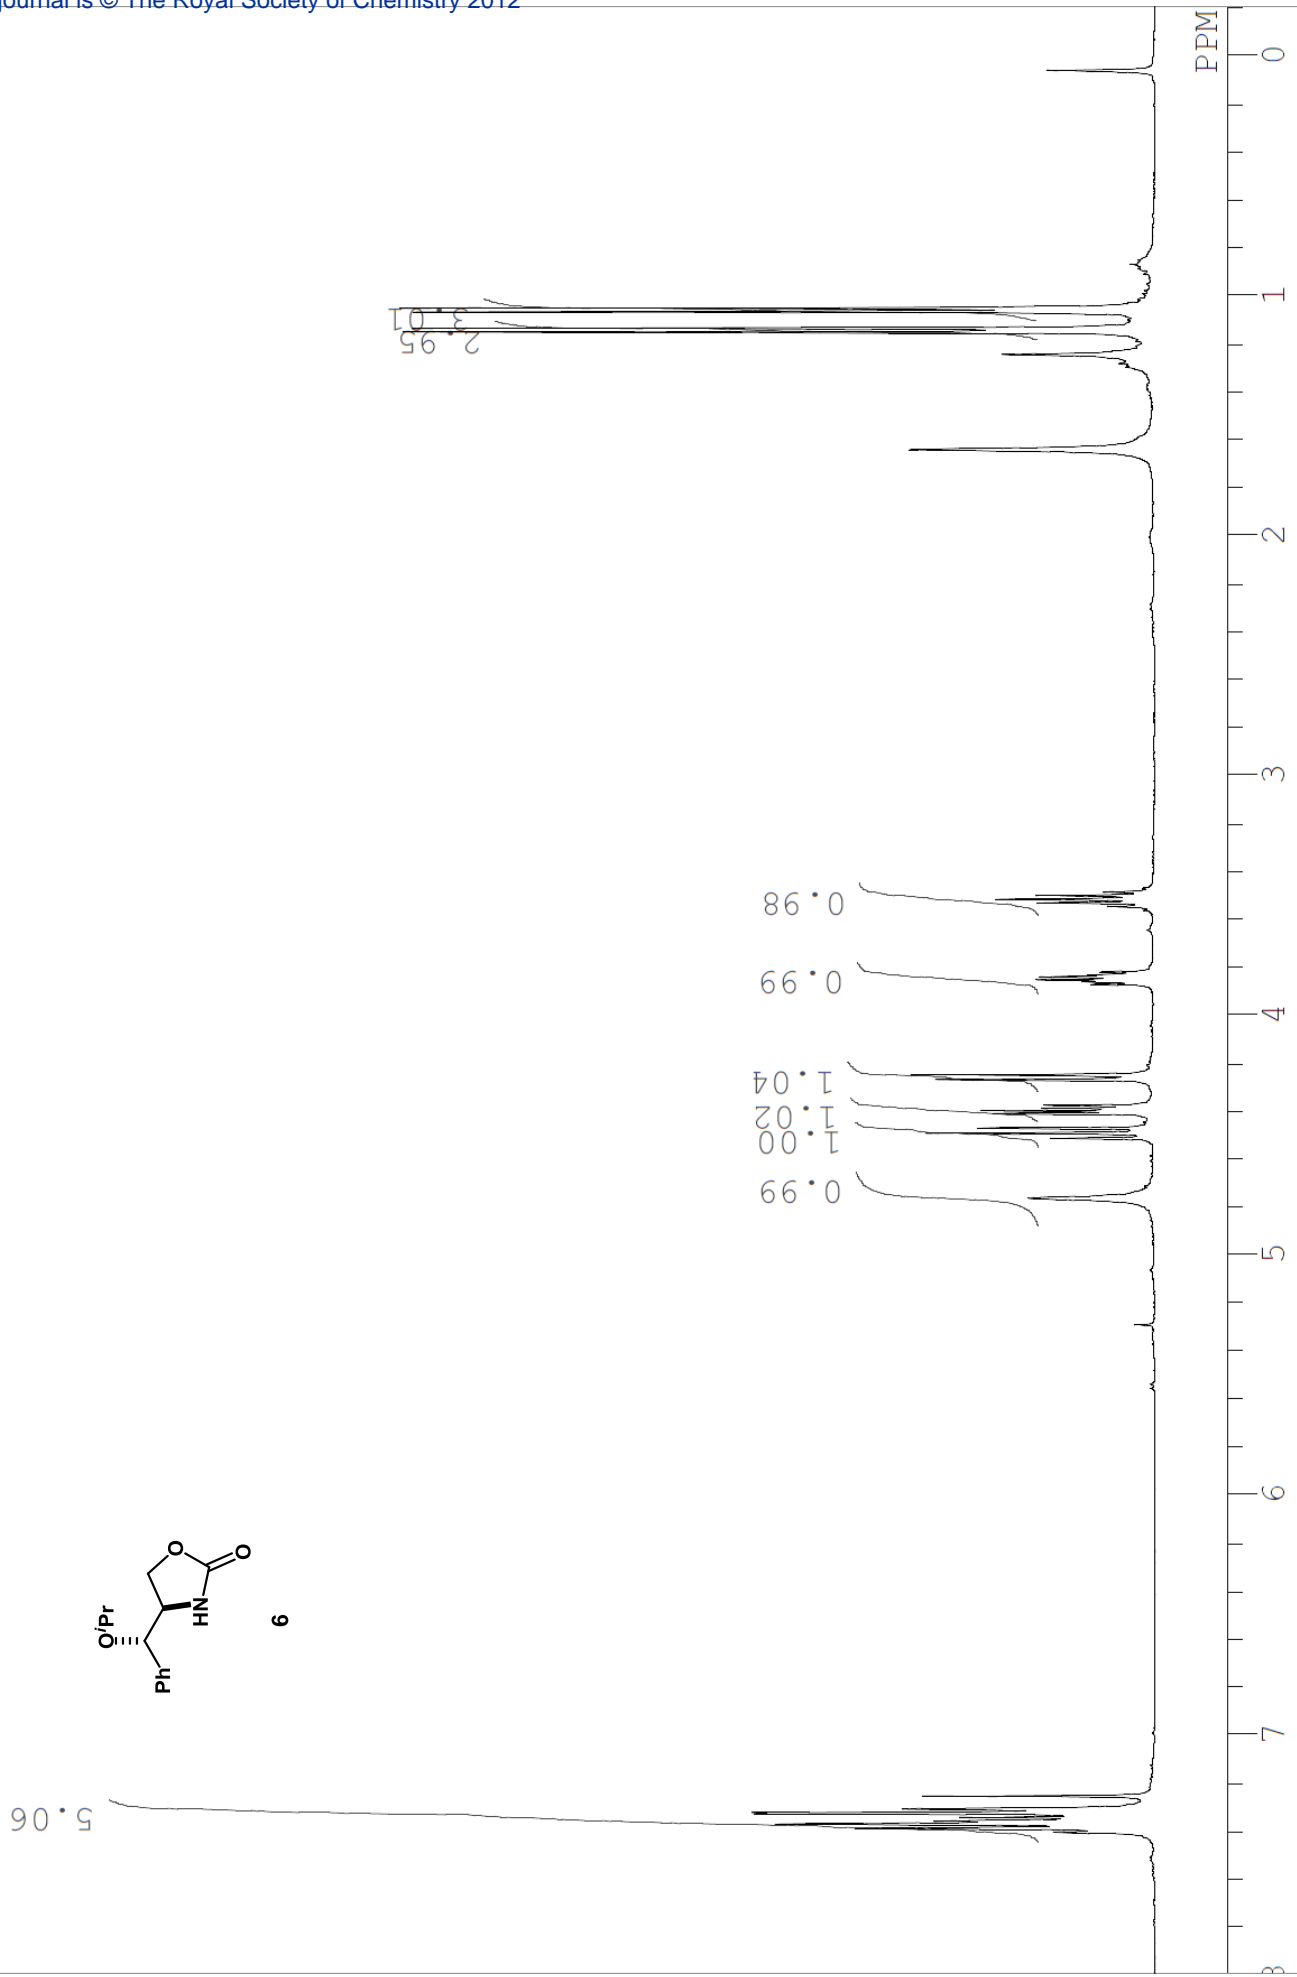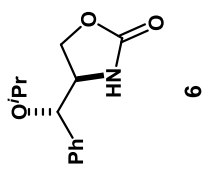

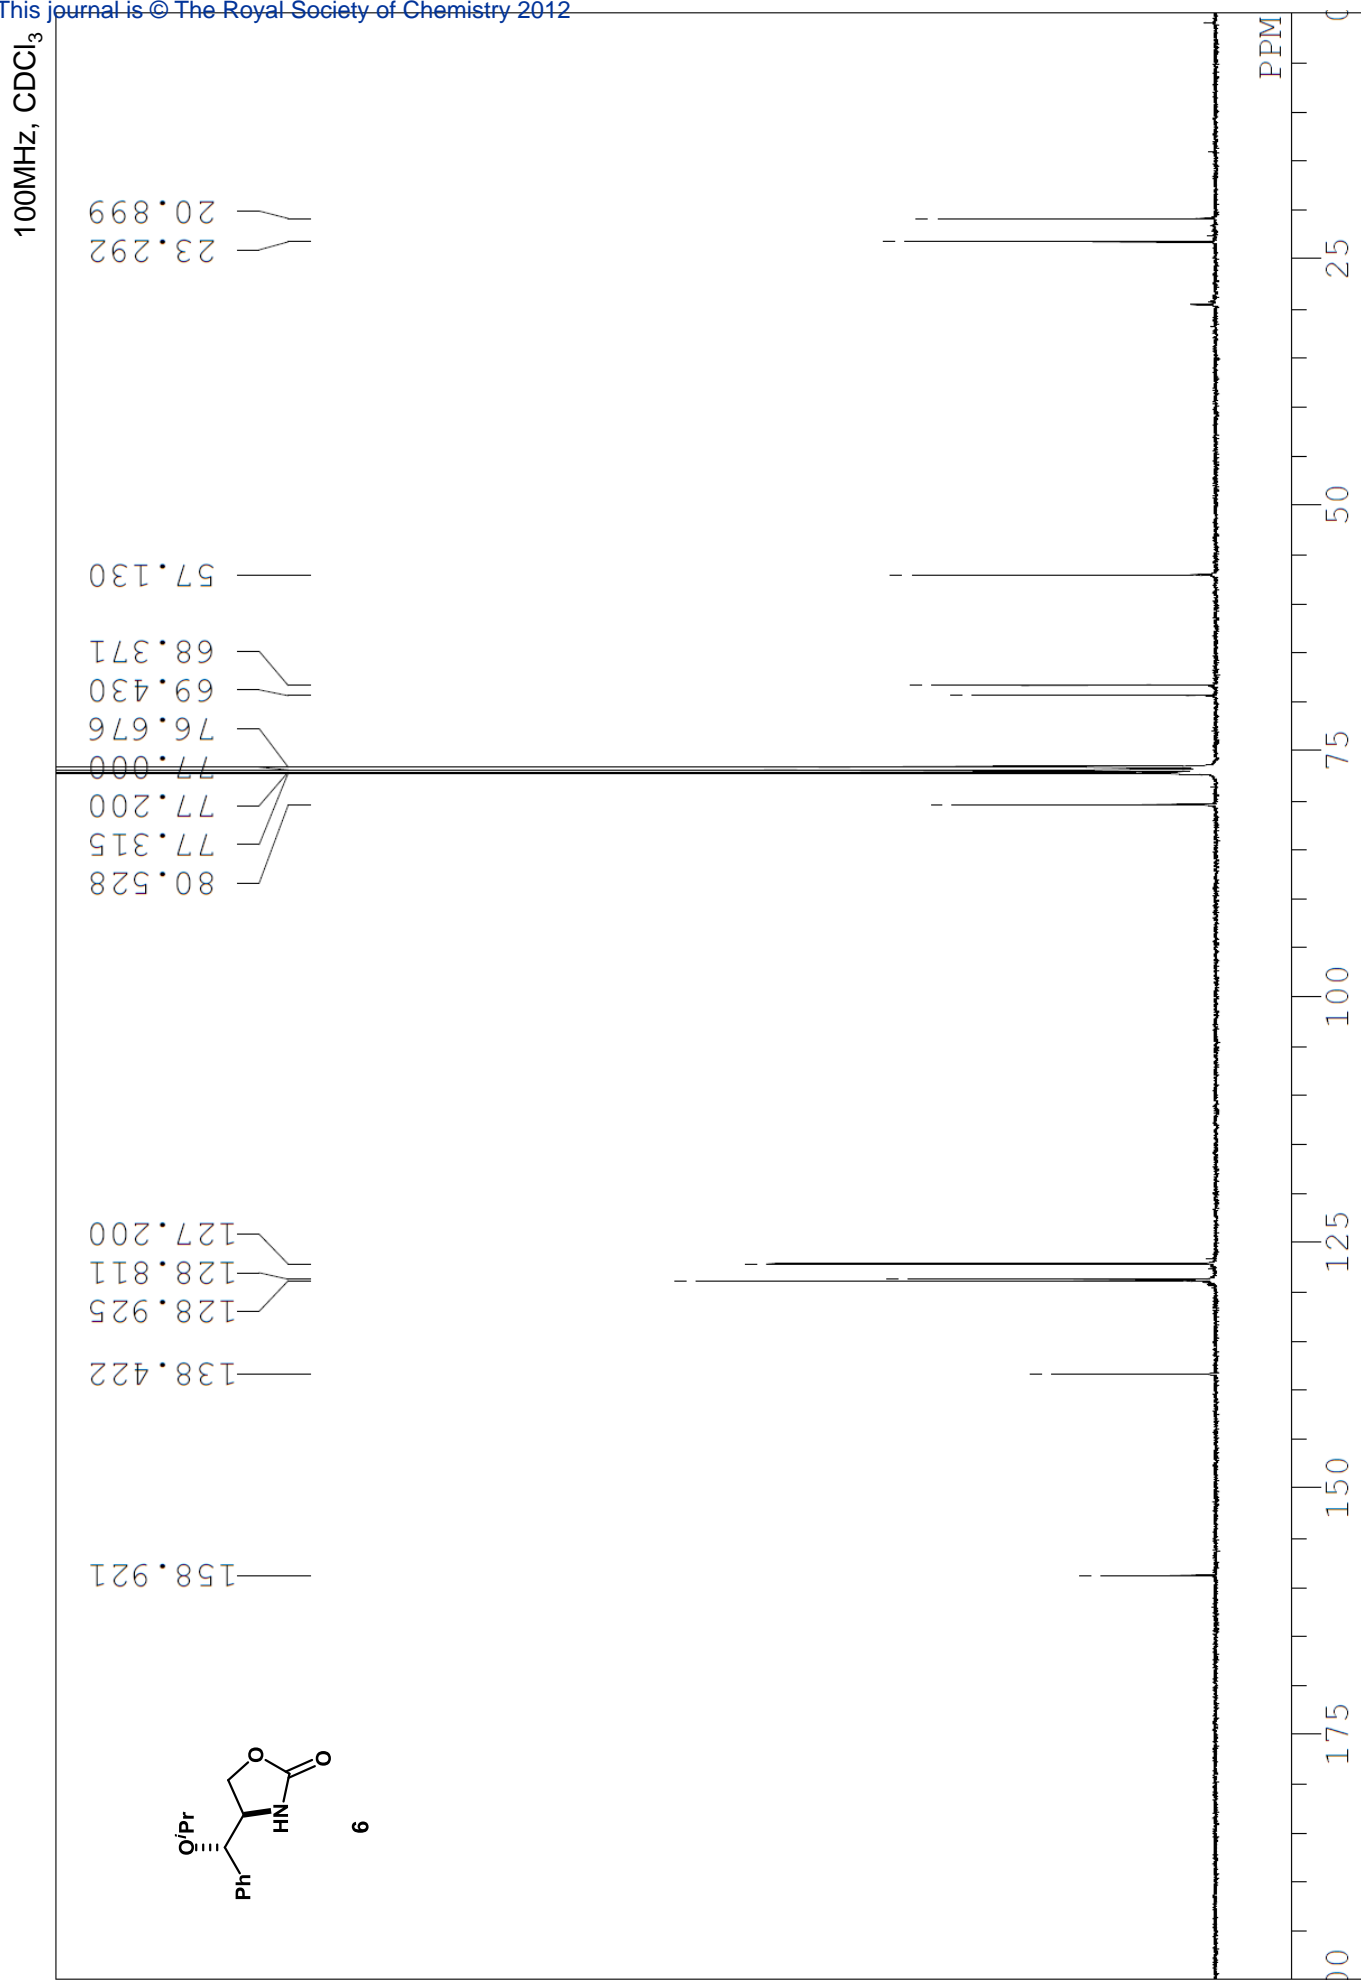

400MHz, CDCl<sub>3</sub>

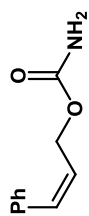

S2

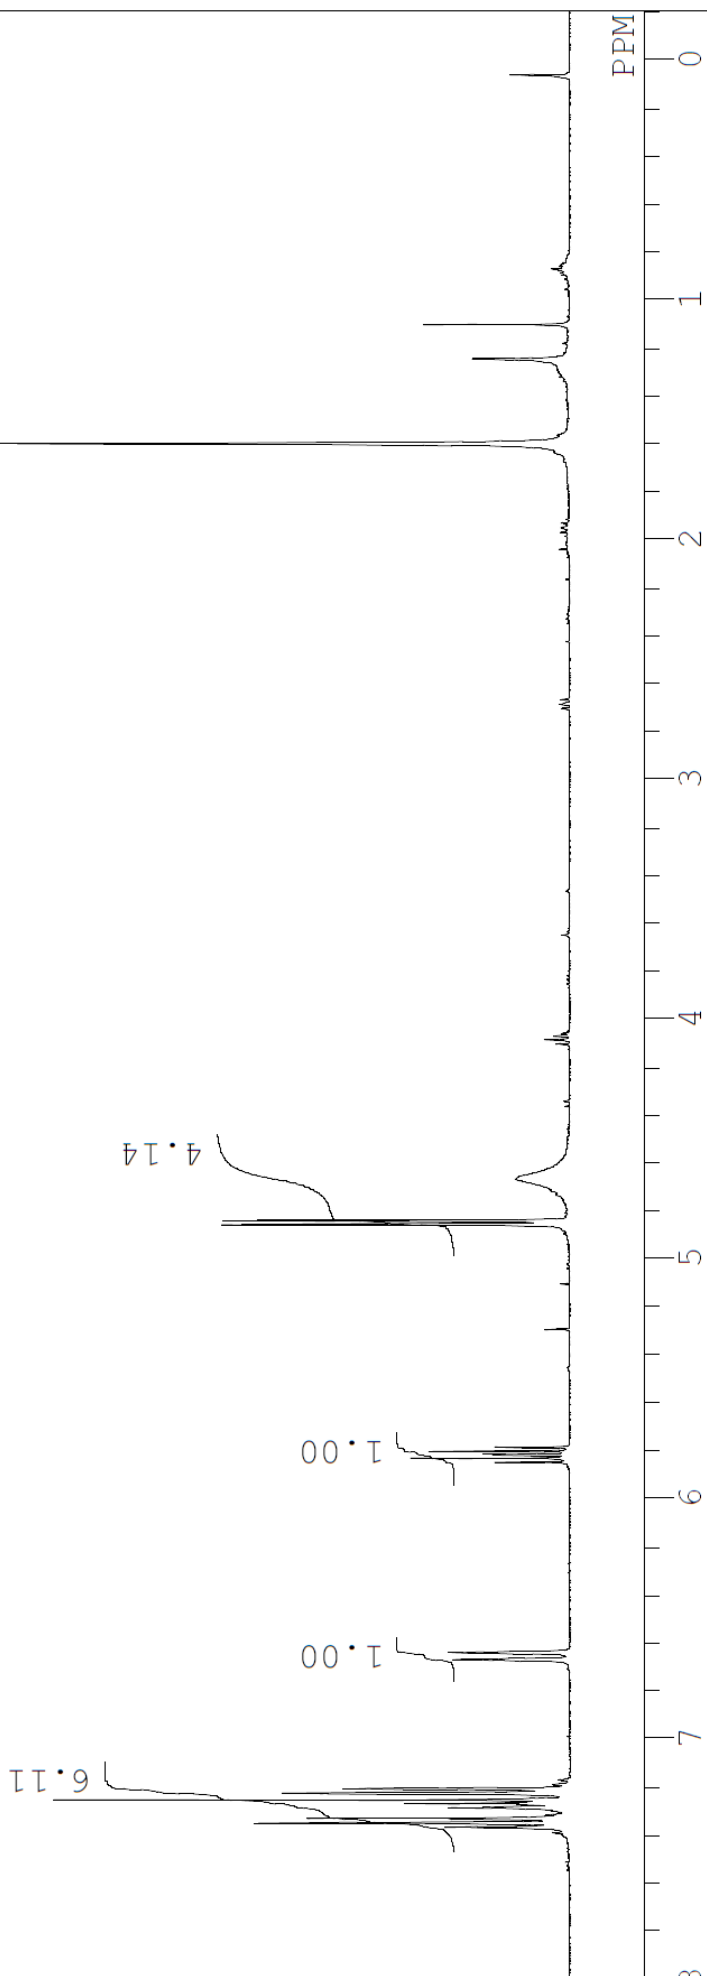



75MHz, CDCl<sub>3</sub>

77.421  
77.000  
76.579  
62.133

136.018  
132.739  
128.713  
128.360  
127.490  
126.113

156.602

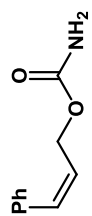

S2

PPM

0  
25  
50  
75  
100  
125  
150  
175  
200

400MHz, CDCl<sub>3</sub>

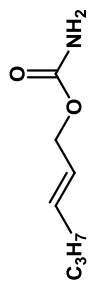

S3

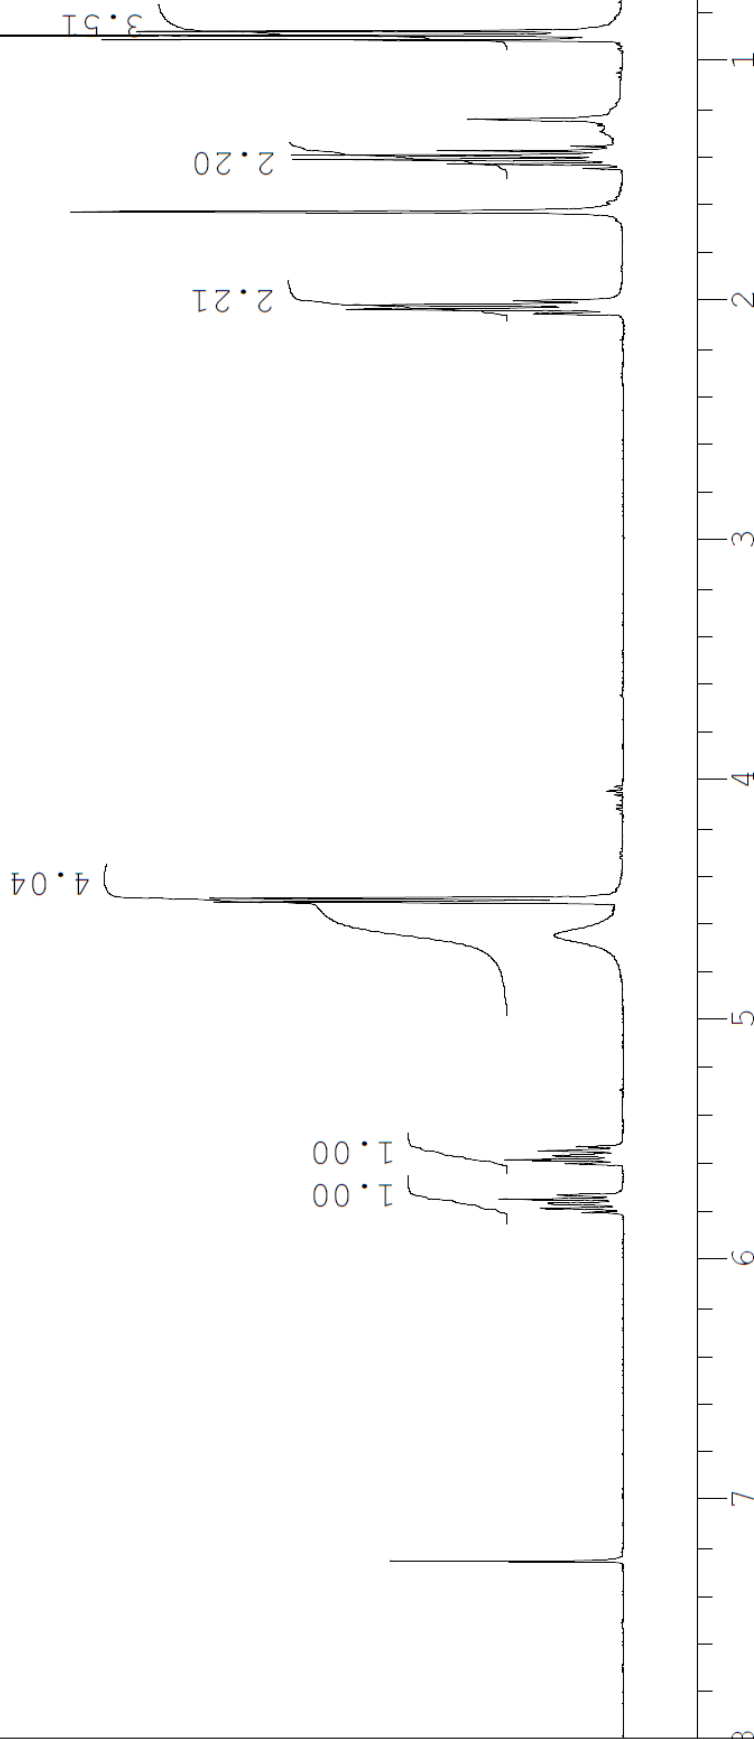

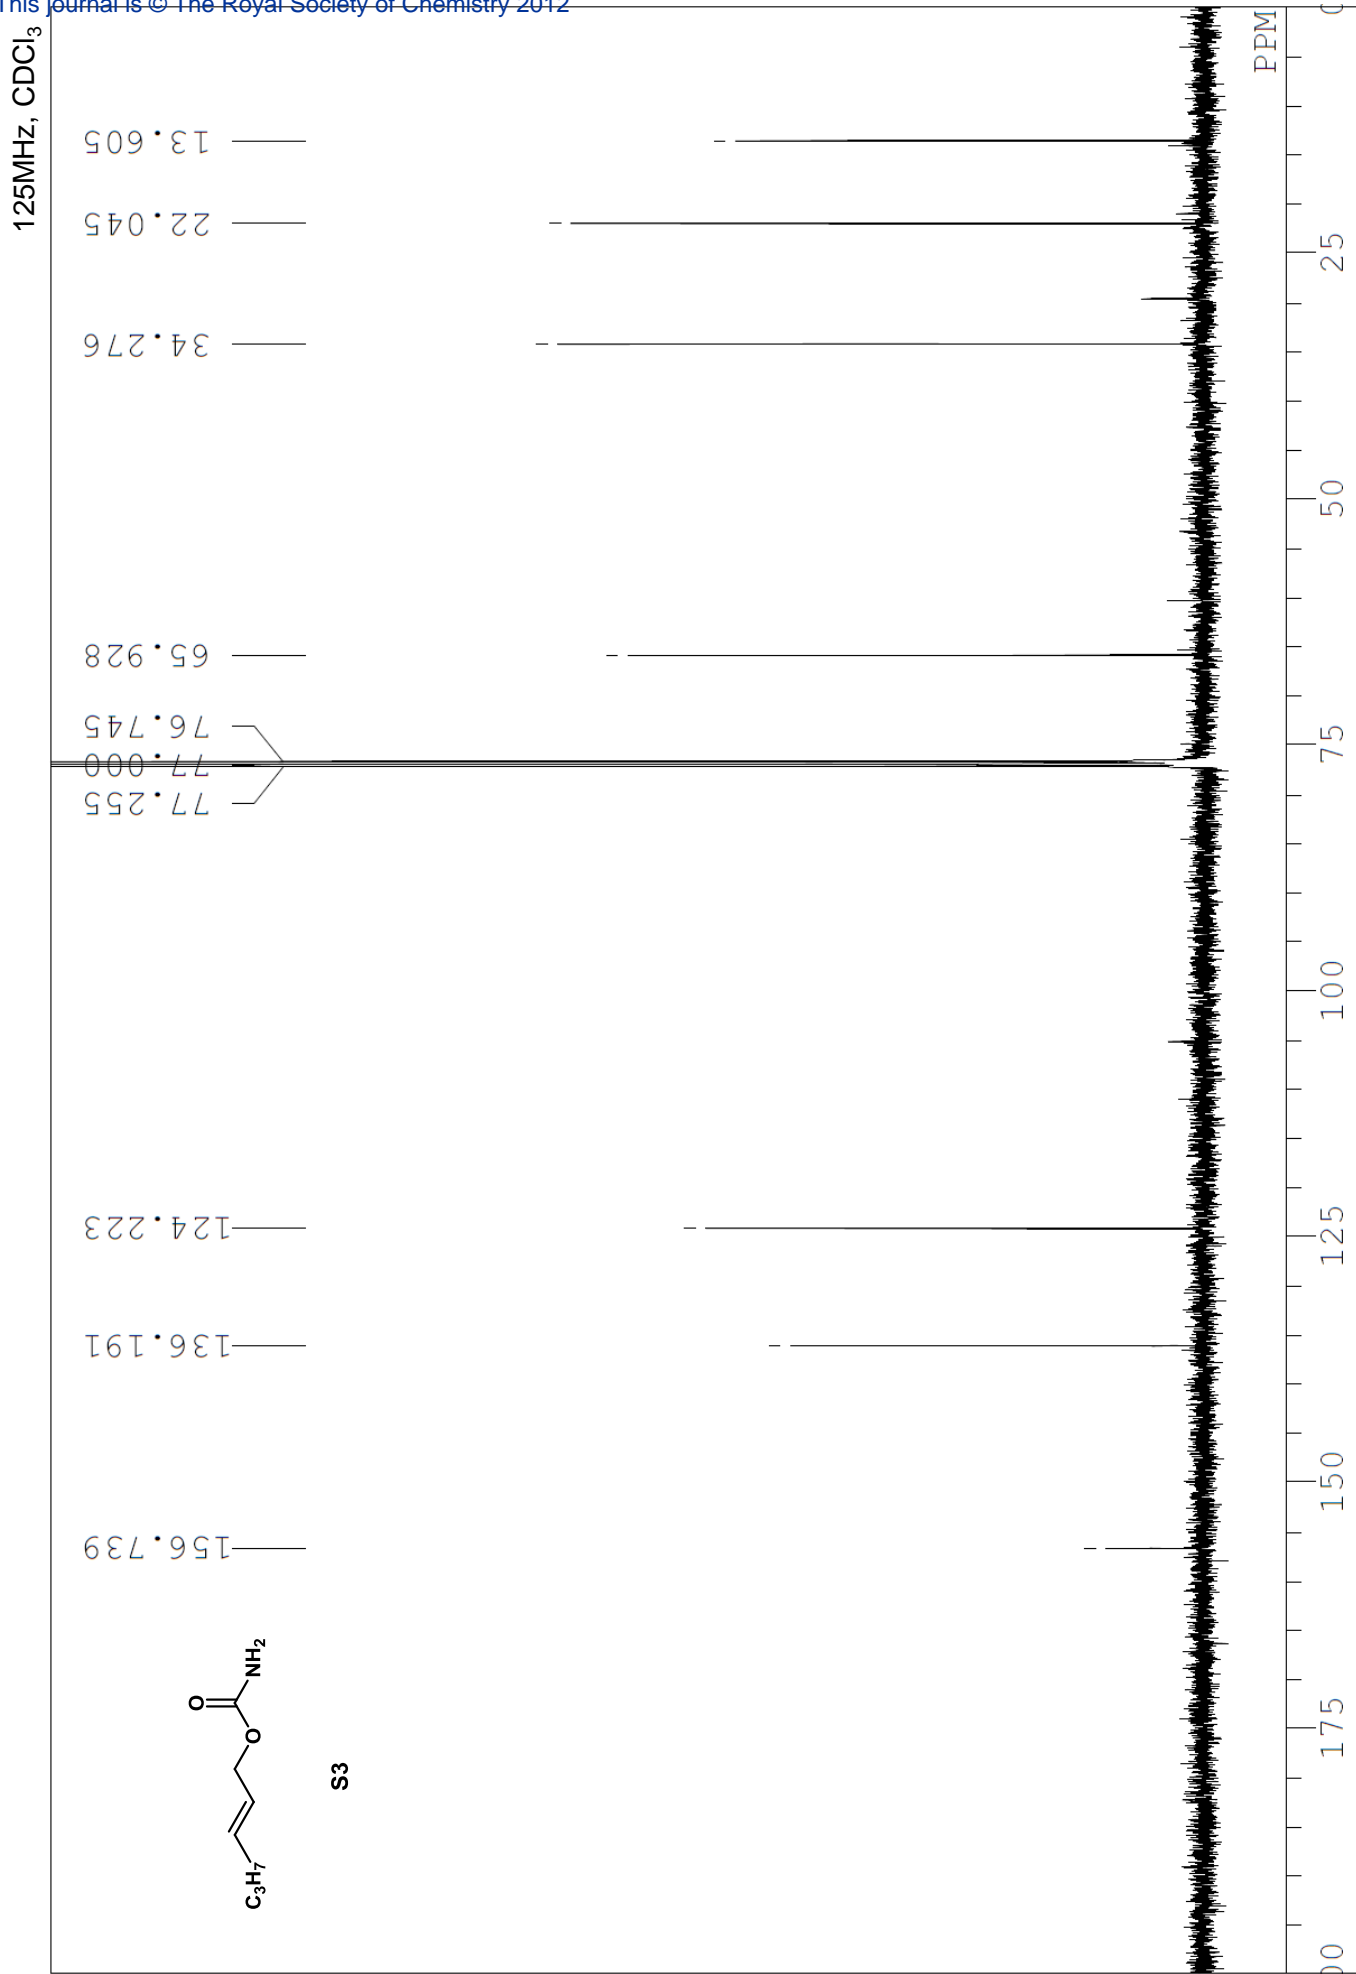

400MHz, CDCl<sub>3</sub>

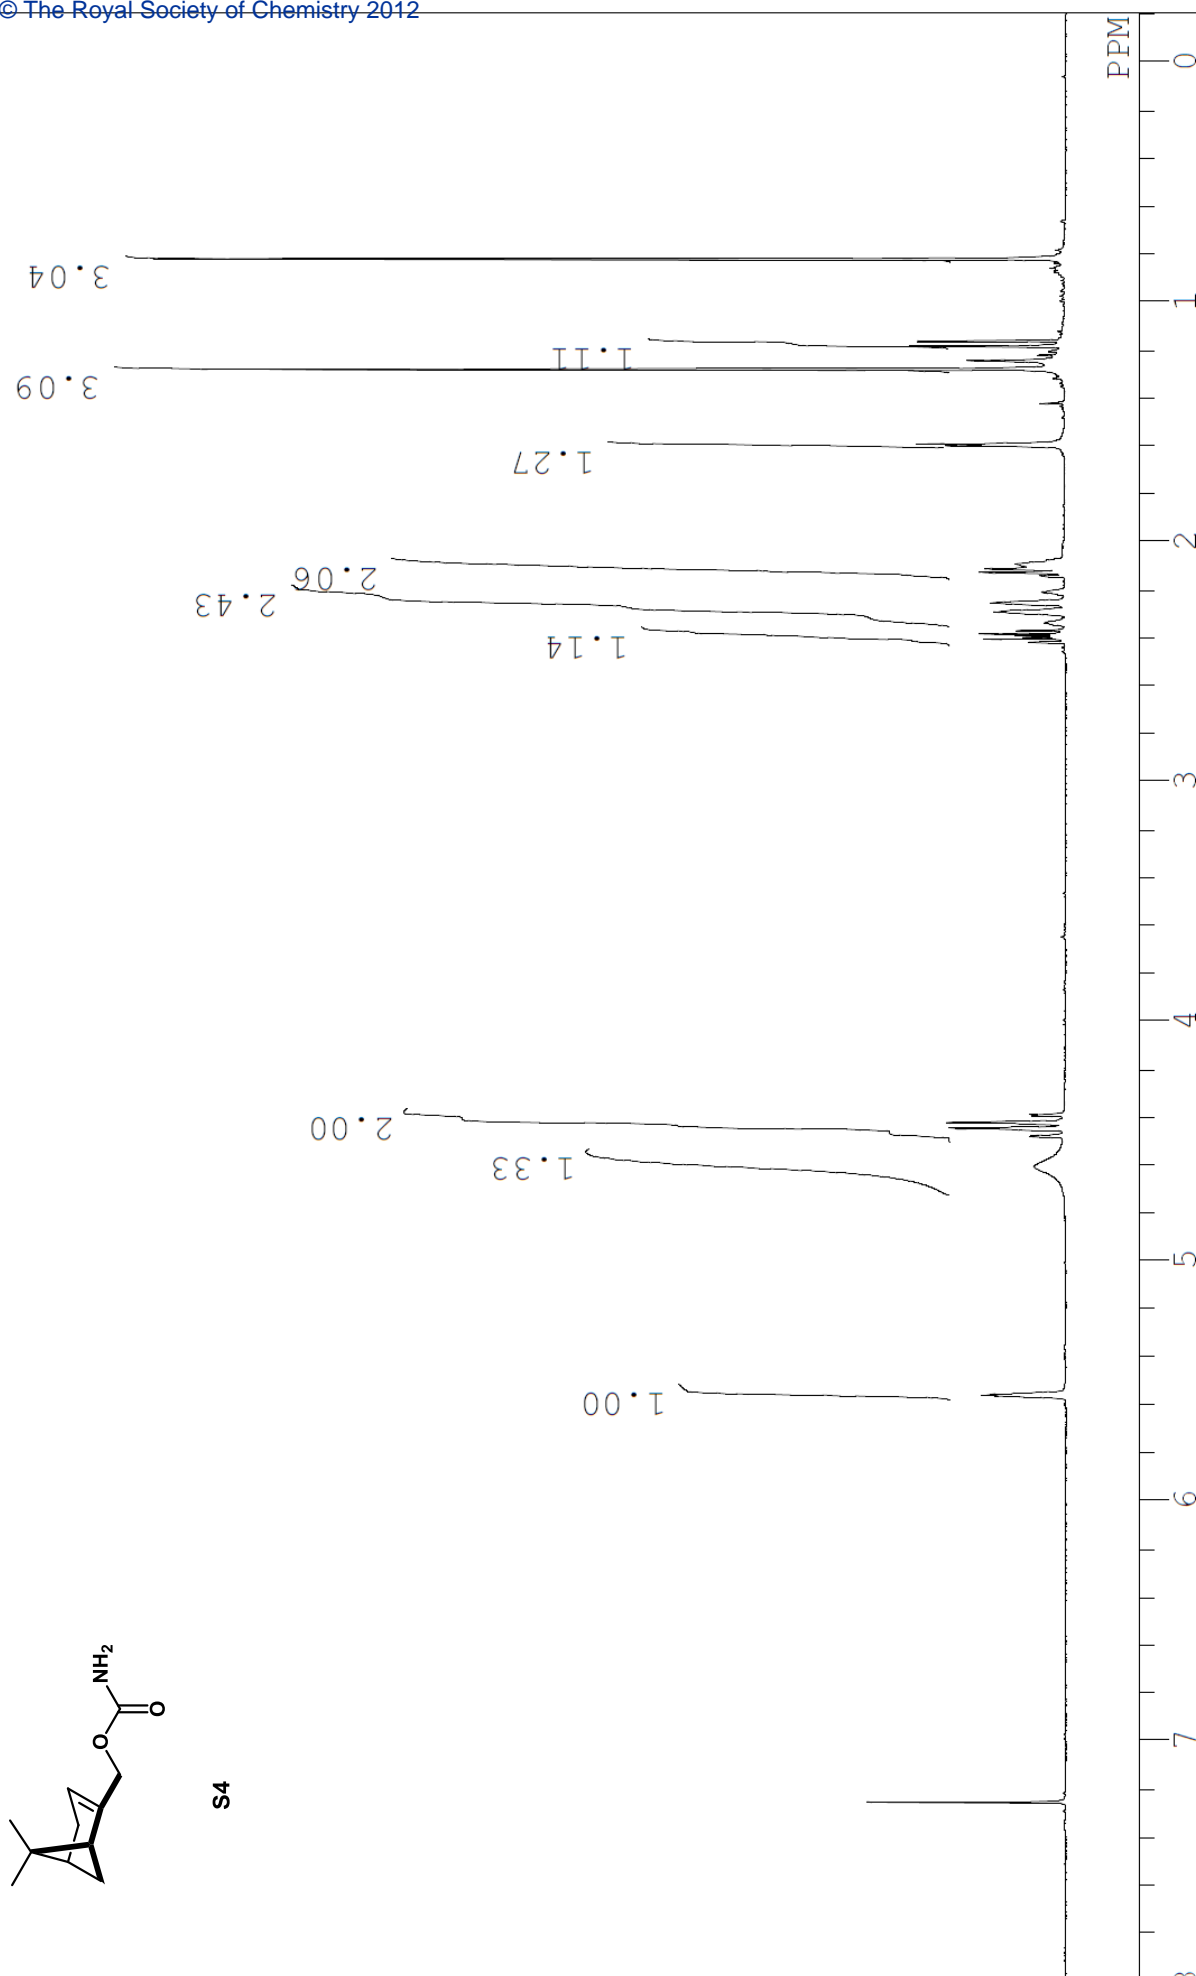

S4

100MHz, CDCl<sub>3</sub>

43.333  
40.635  
37.956  
31.425  
31.177  
26.066  
20.965

77.324  
77.000  
76.685  
67.628

121.107

143.246

157.148

PPM

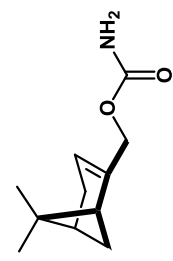

S4

300MHz, CDCl<sub>3</sub>

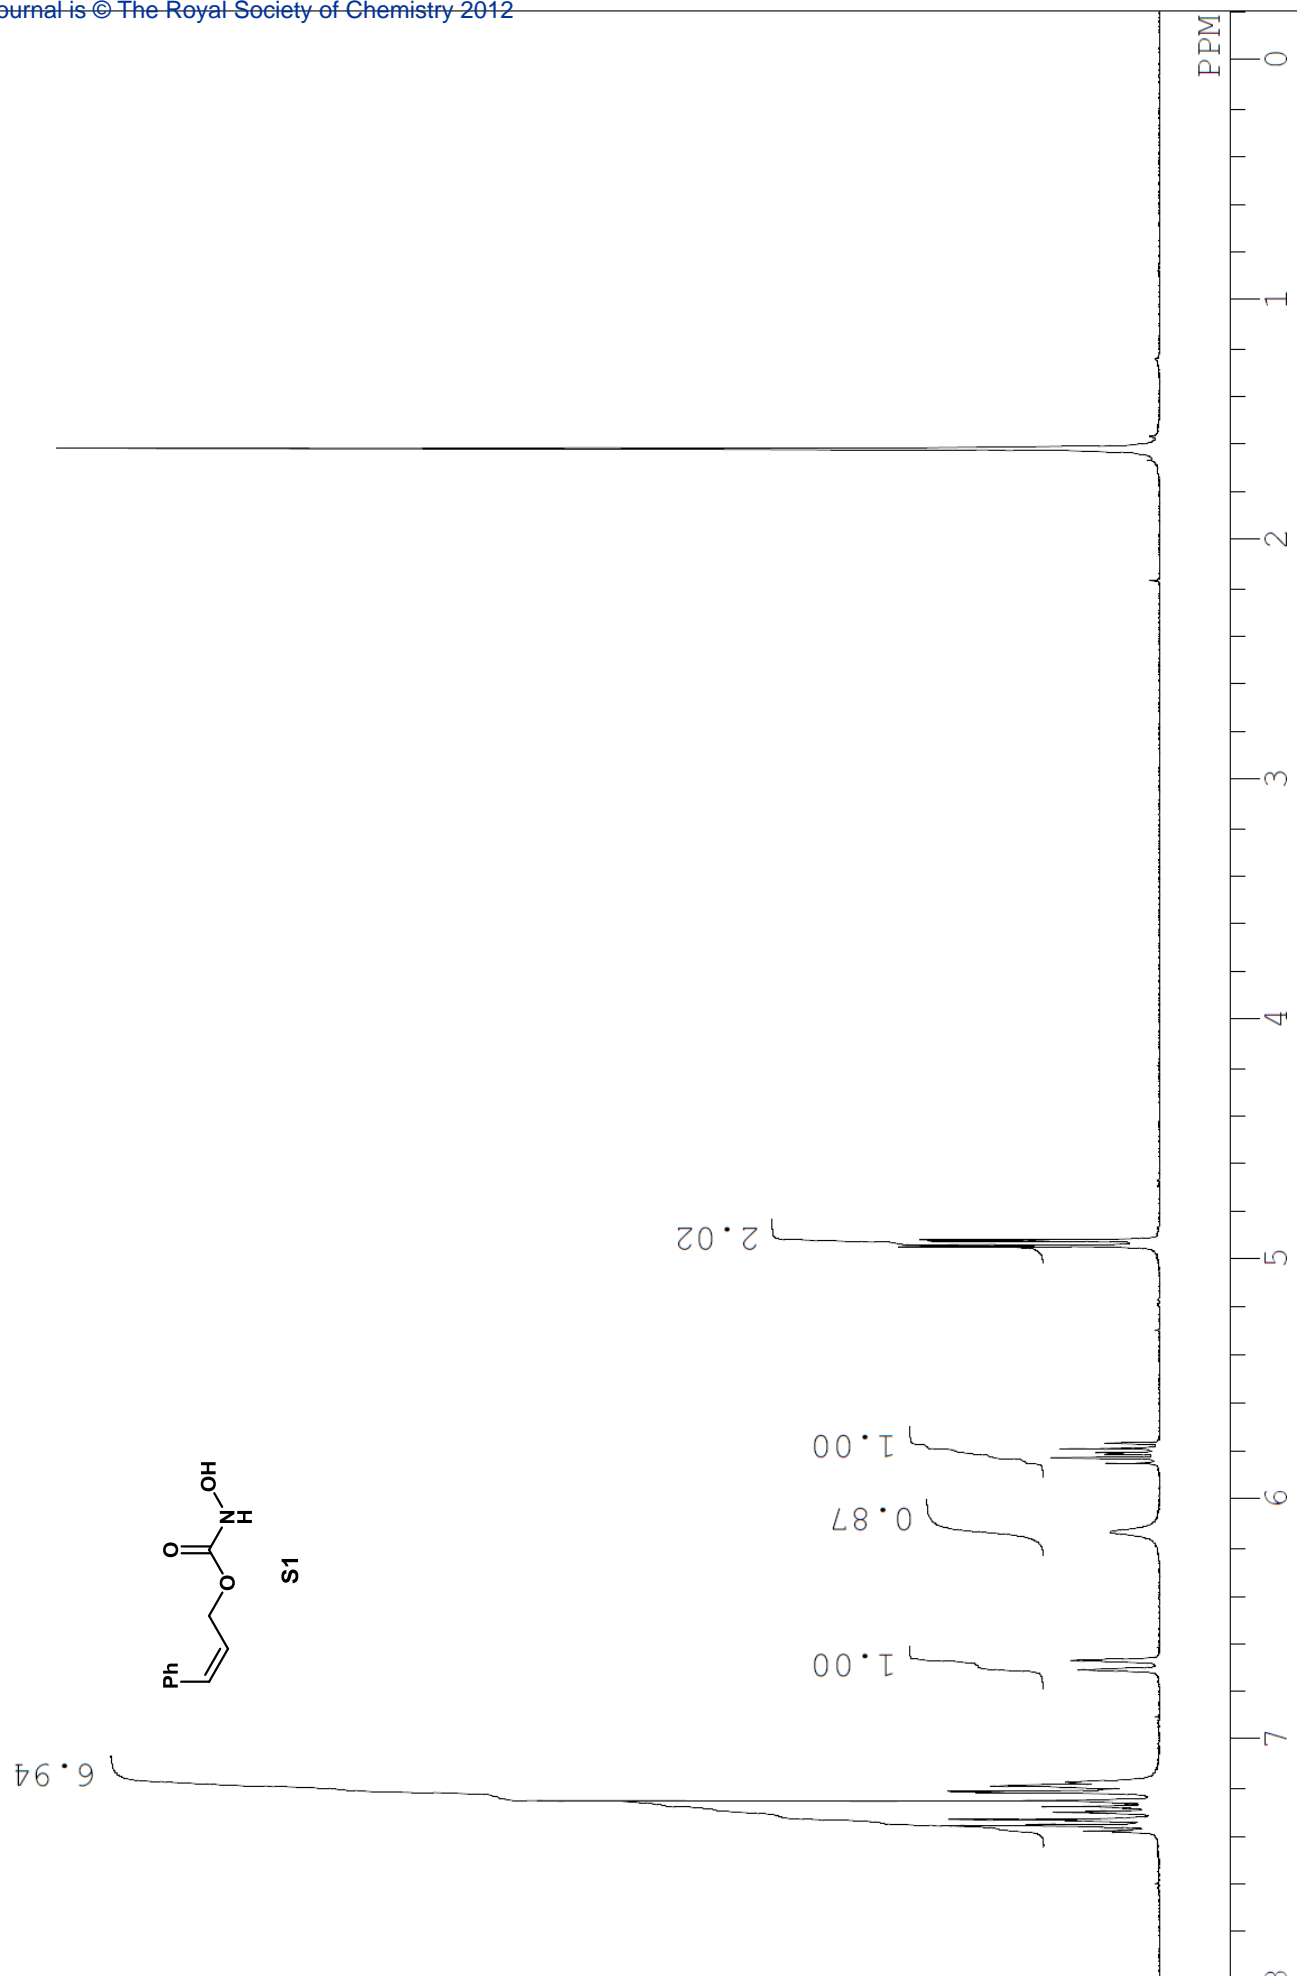

100MHz, CDCl<sub>3</sub>

77.315  
77.000  
76.676  
63.070

135.790  
133.492  
128.668  
128.401  
127.638  
125.159

159.140

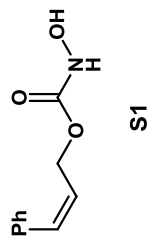

PPM

0 25 50 75 100 125 150 175 200



300MHz, CDCl<sub>3</sub>

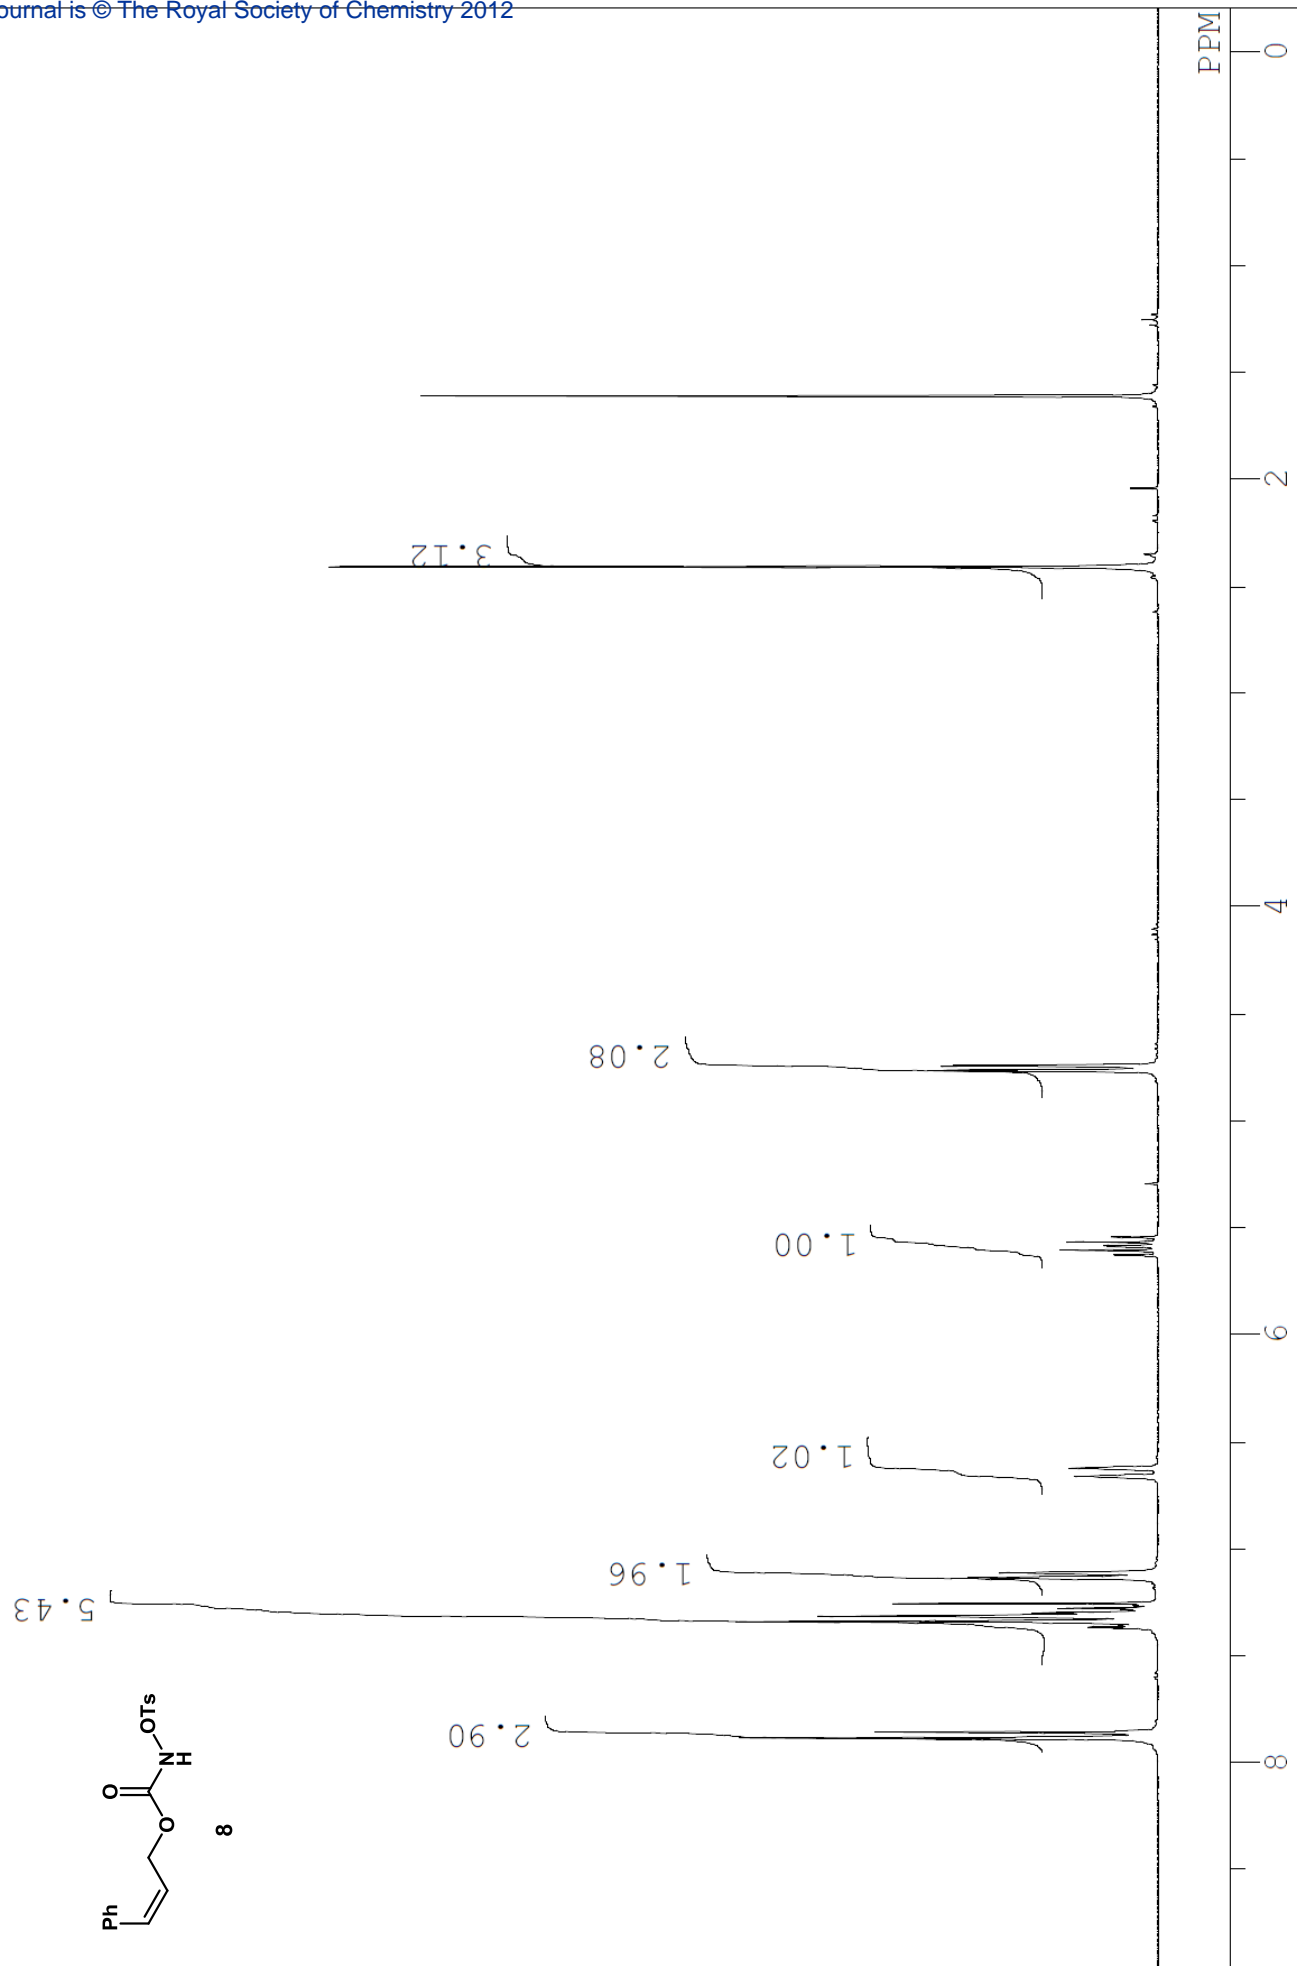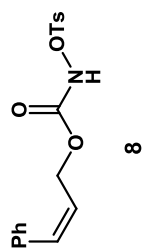

100MHz, CDCl<sub>3</sub>

21.690

63.709

76.676  
77.000  
77.315

124.272  
127.695  
128.382  
128.573  
129.507  
129.698  
130.136  
133.702  
135.495  
146.145  
155.346

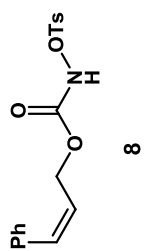

PPM

0  
25  
50  
75  
100  
125  
150  
175

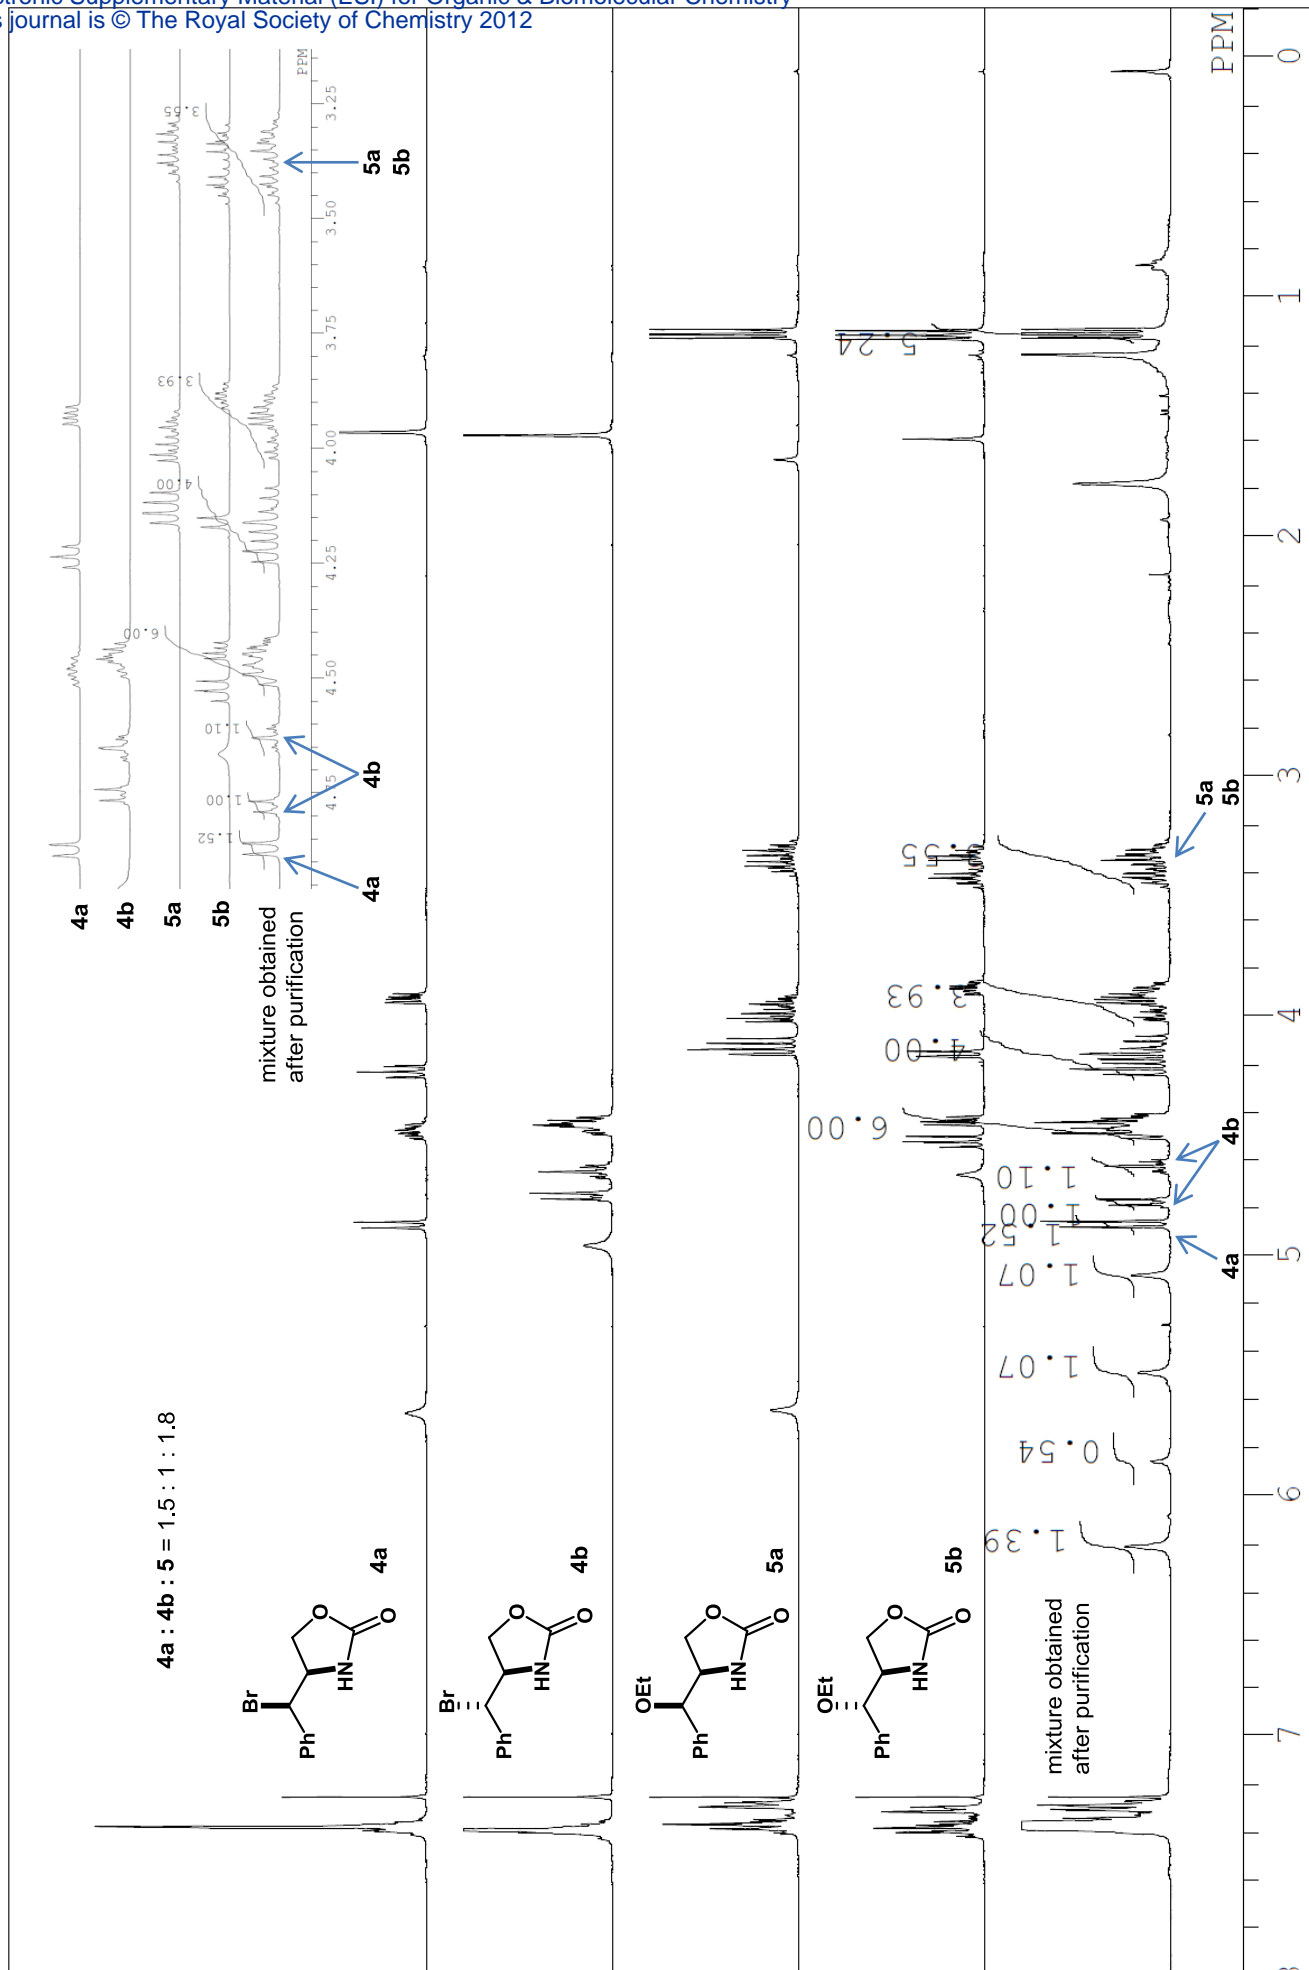

Table 1, entry 2

400MHz CDCl<sub>3</sub>

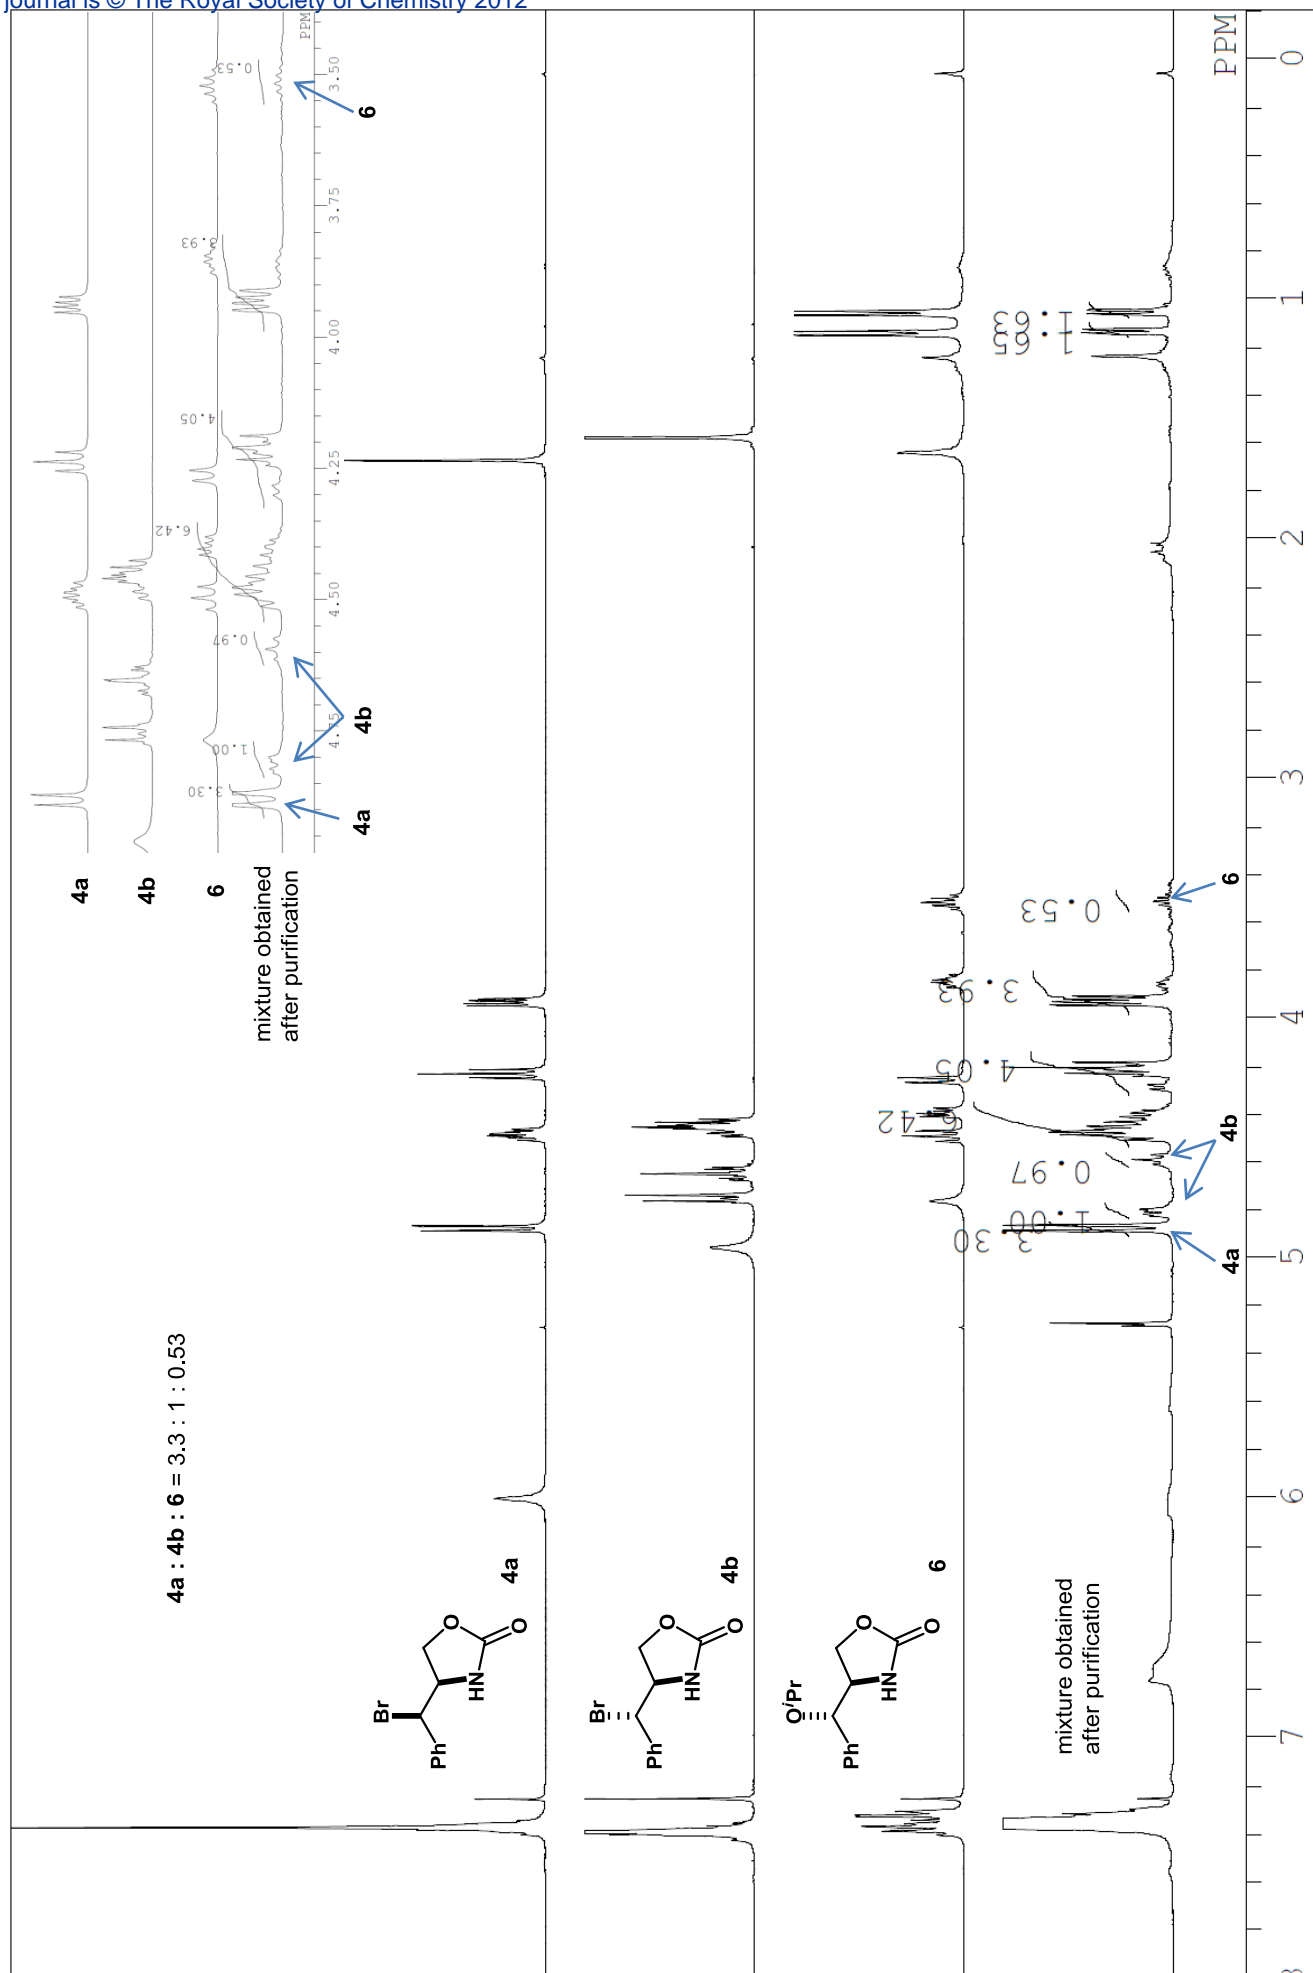



Table 1, entry 4

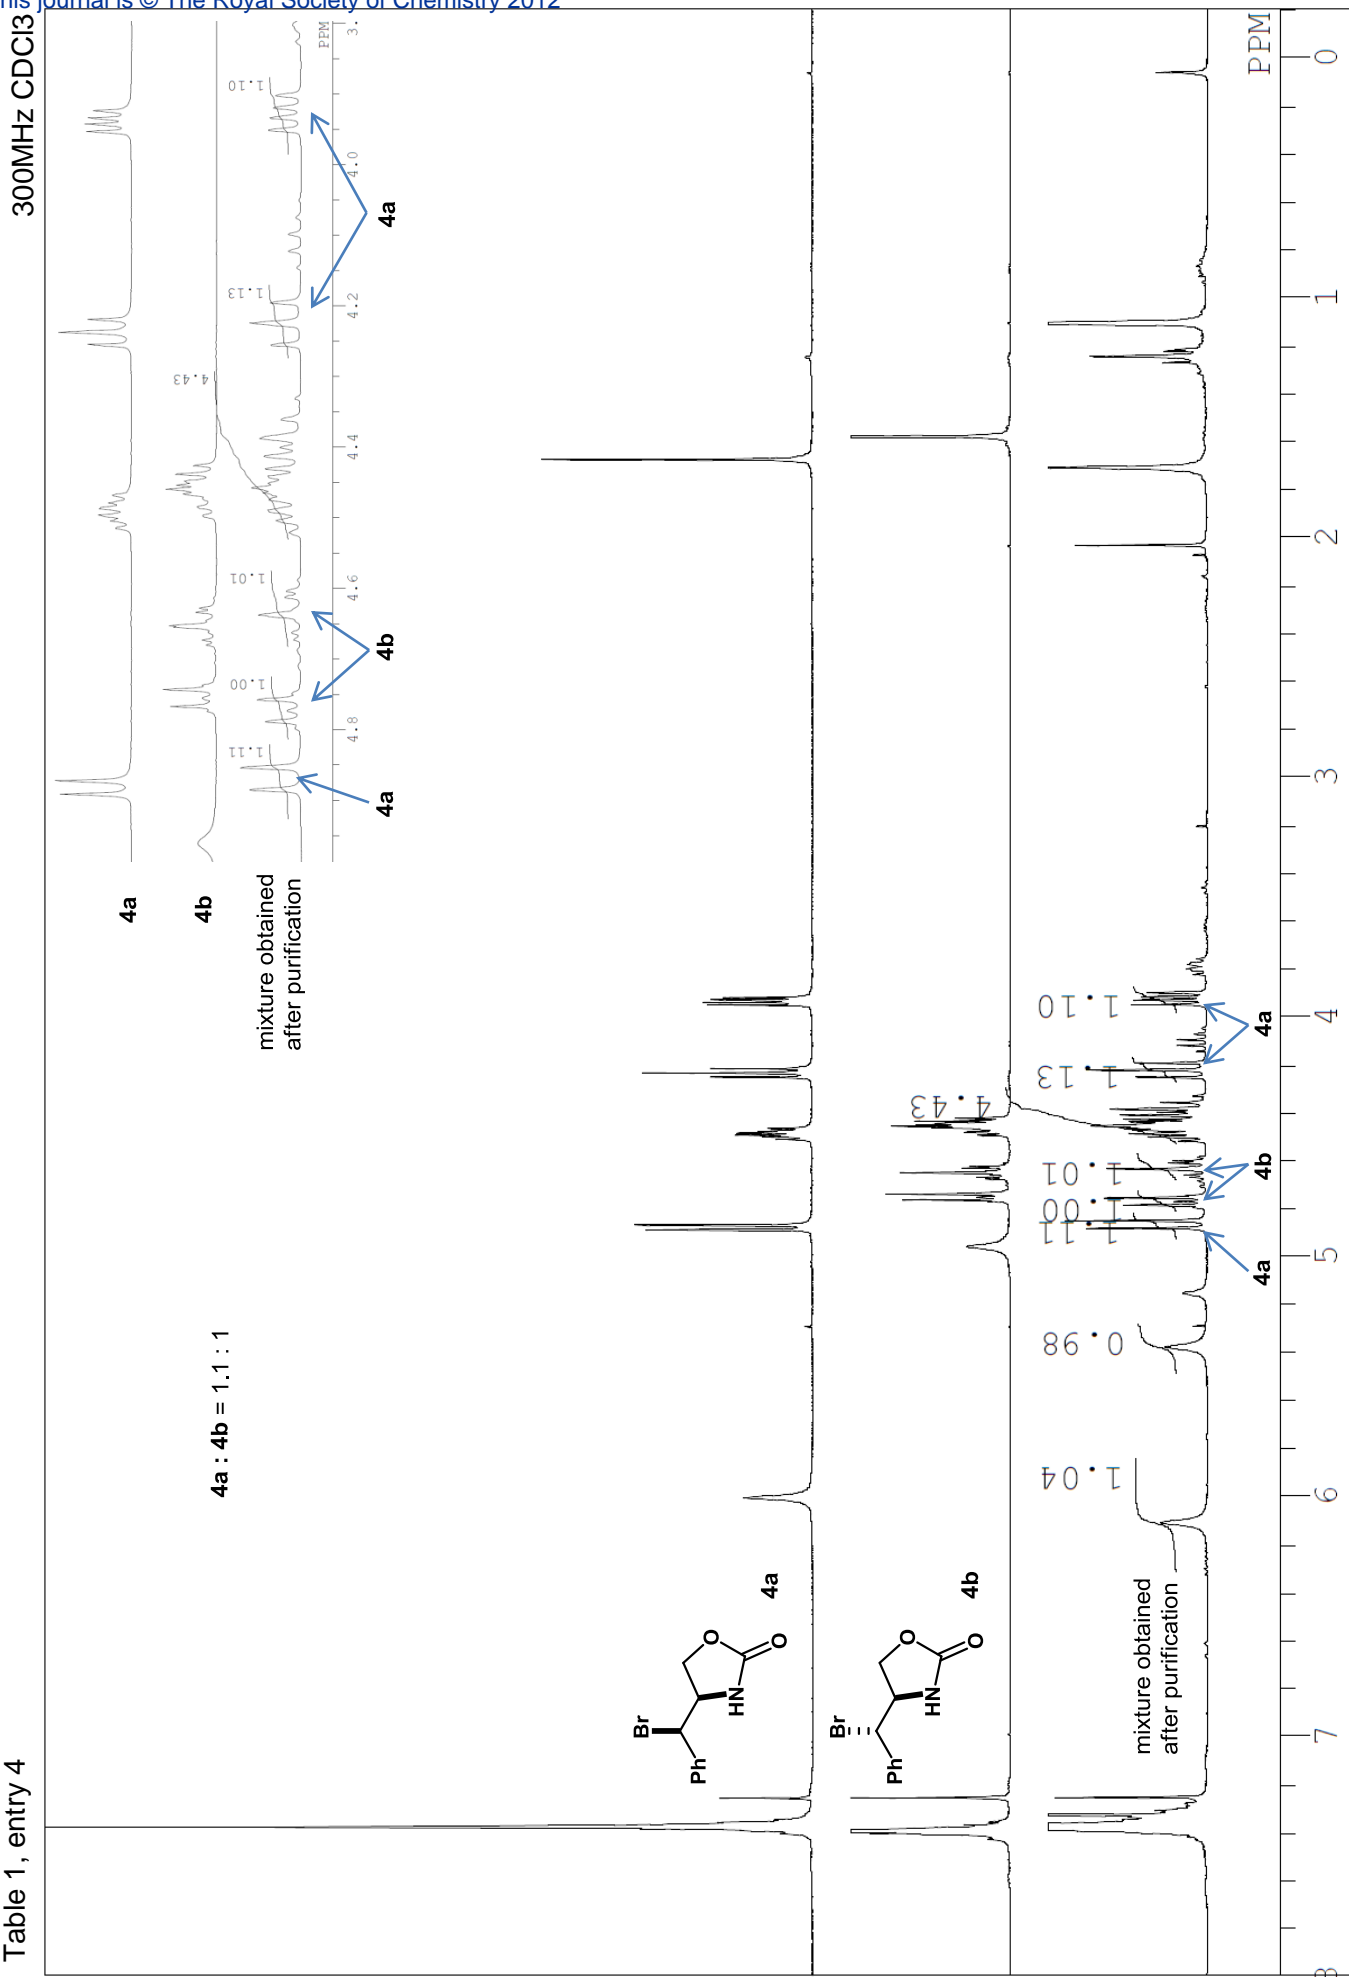

Table 1, entry 6

300MHz CDCl<sub>3</sub>

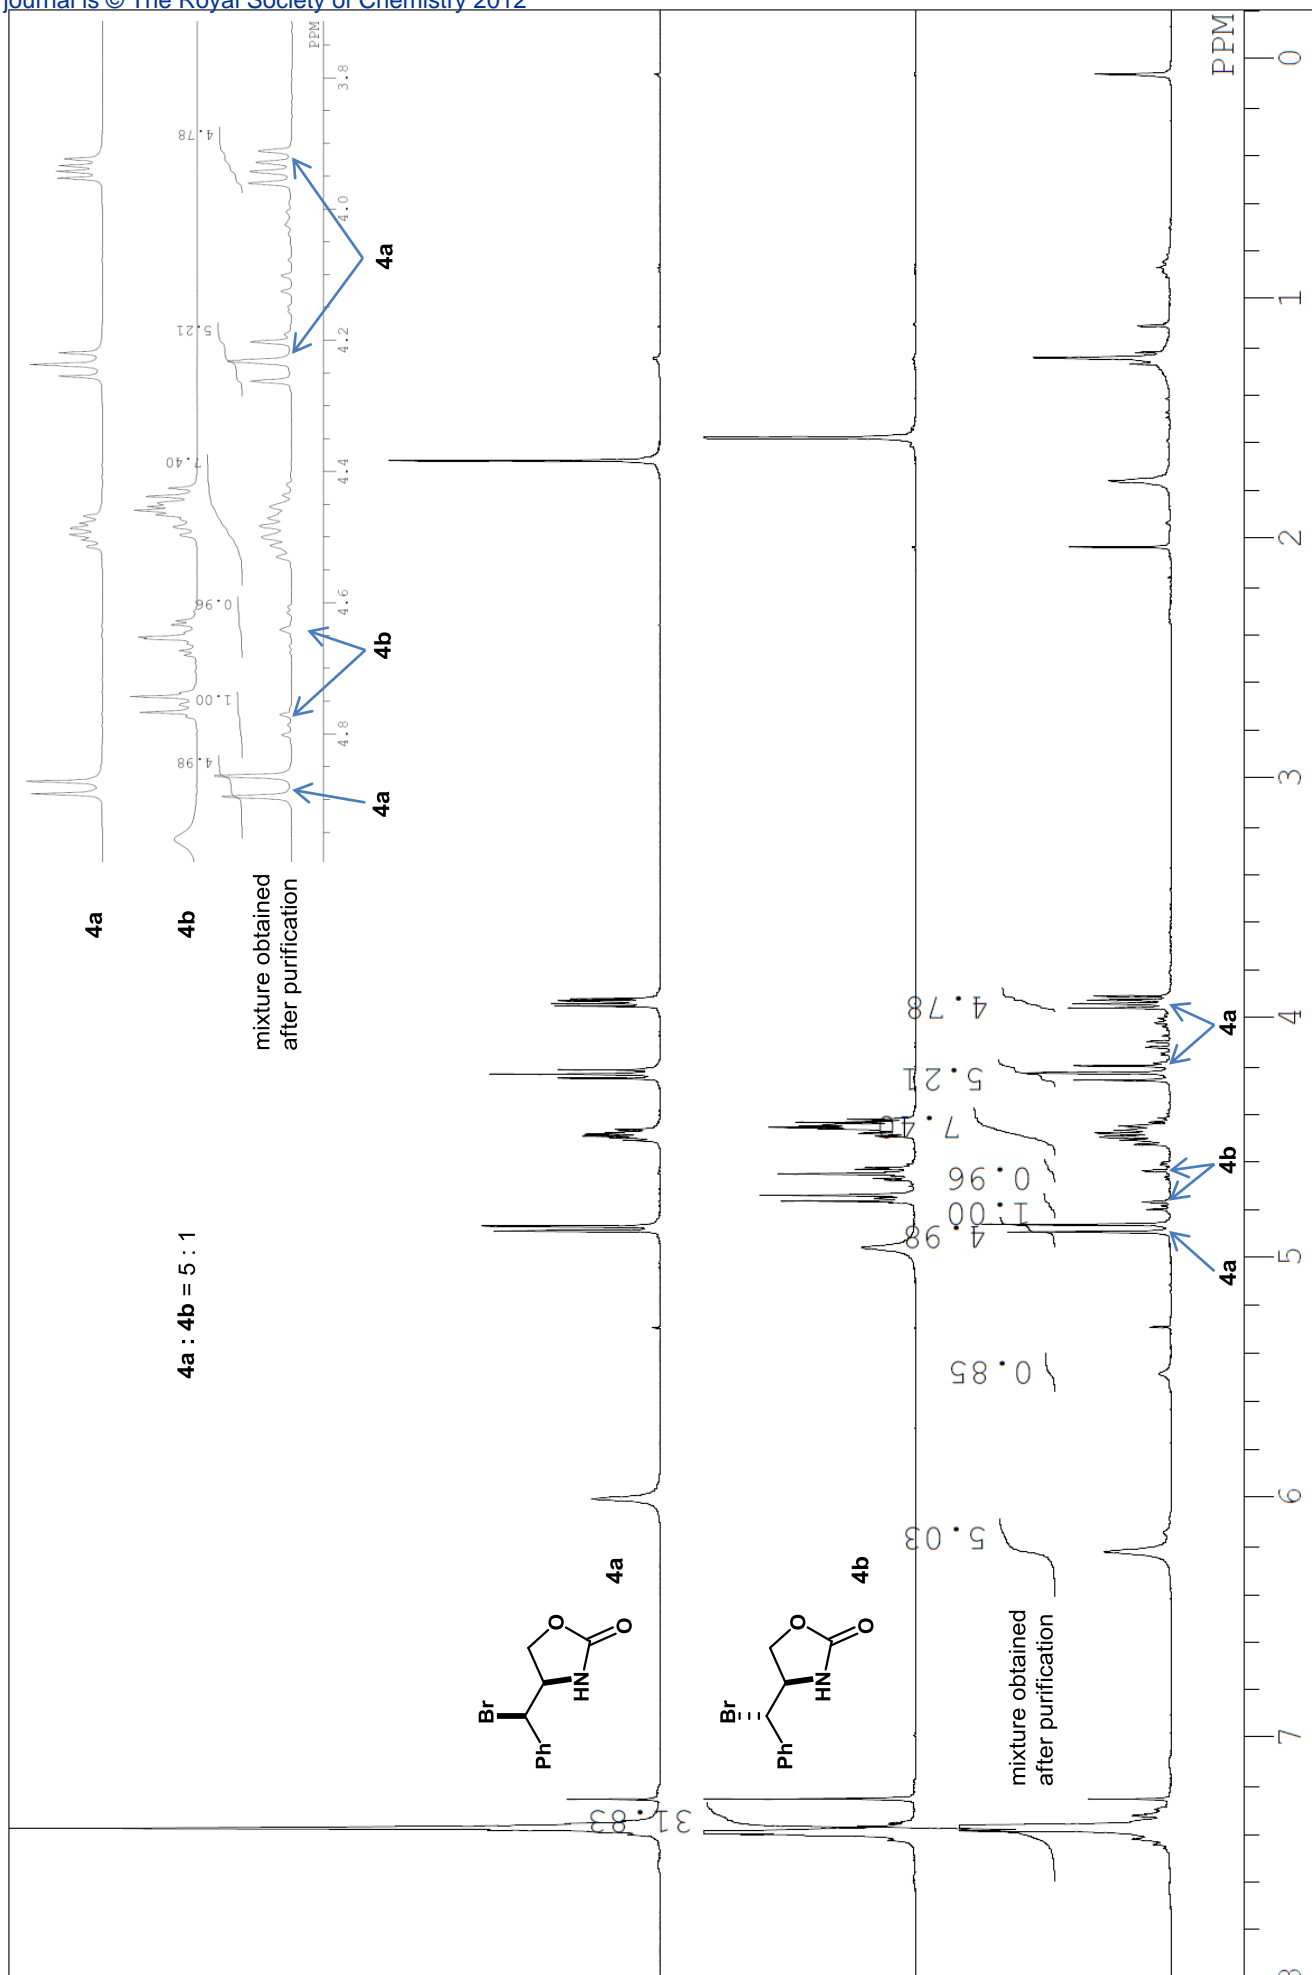

400MHz CDCl<sub>3</sub>

Table 2, entry 1

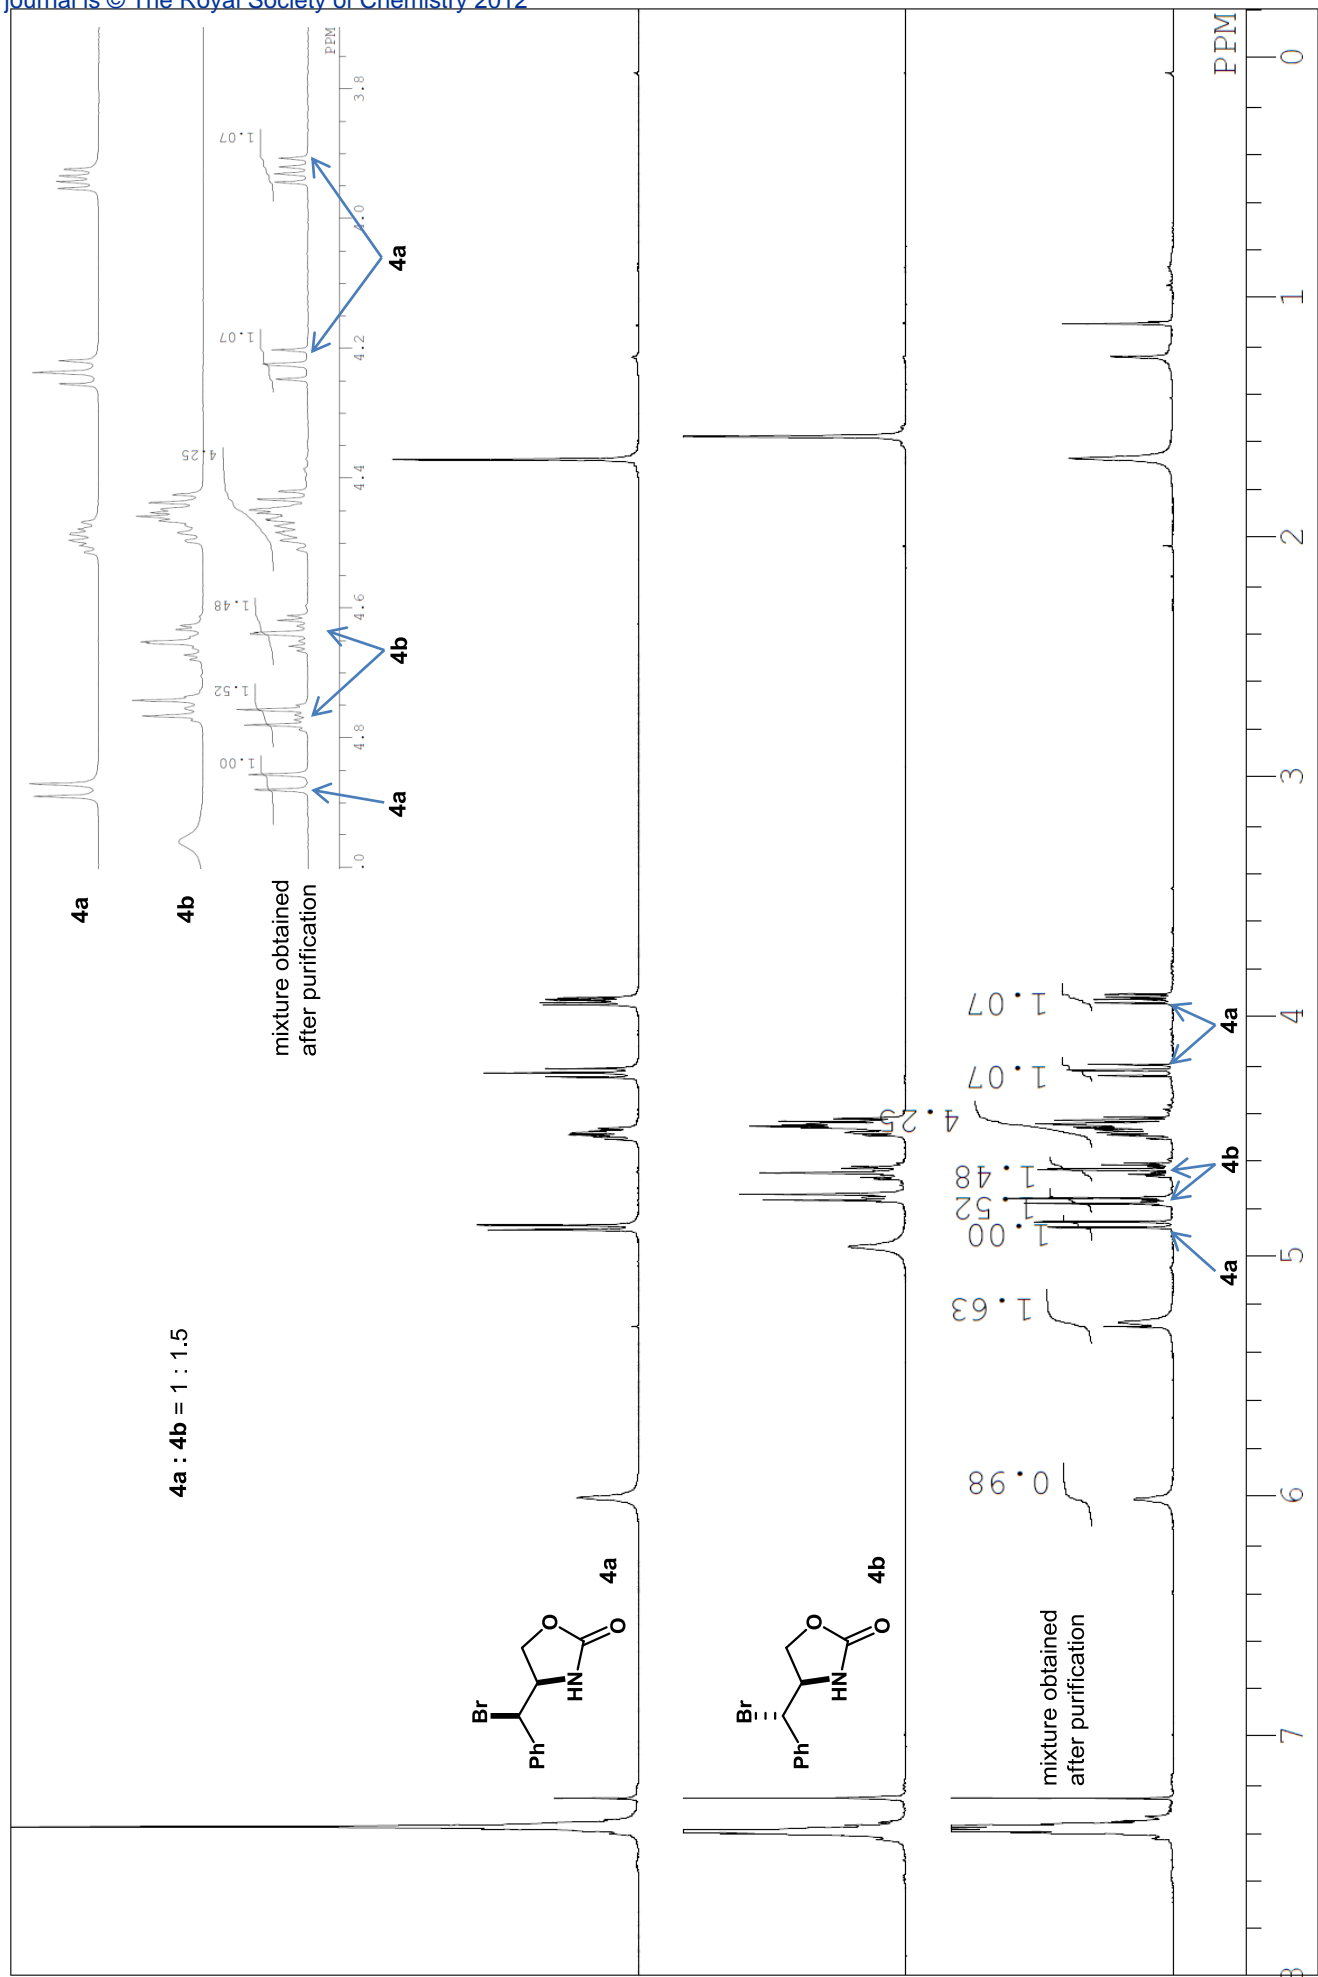



Table 2, entry 2

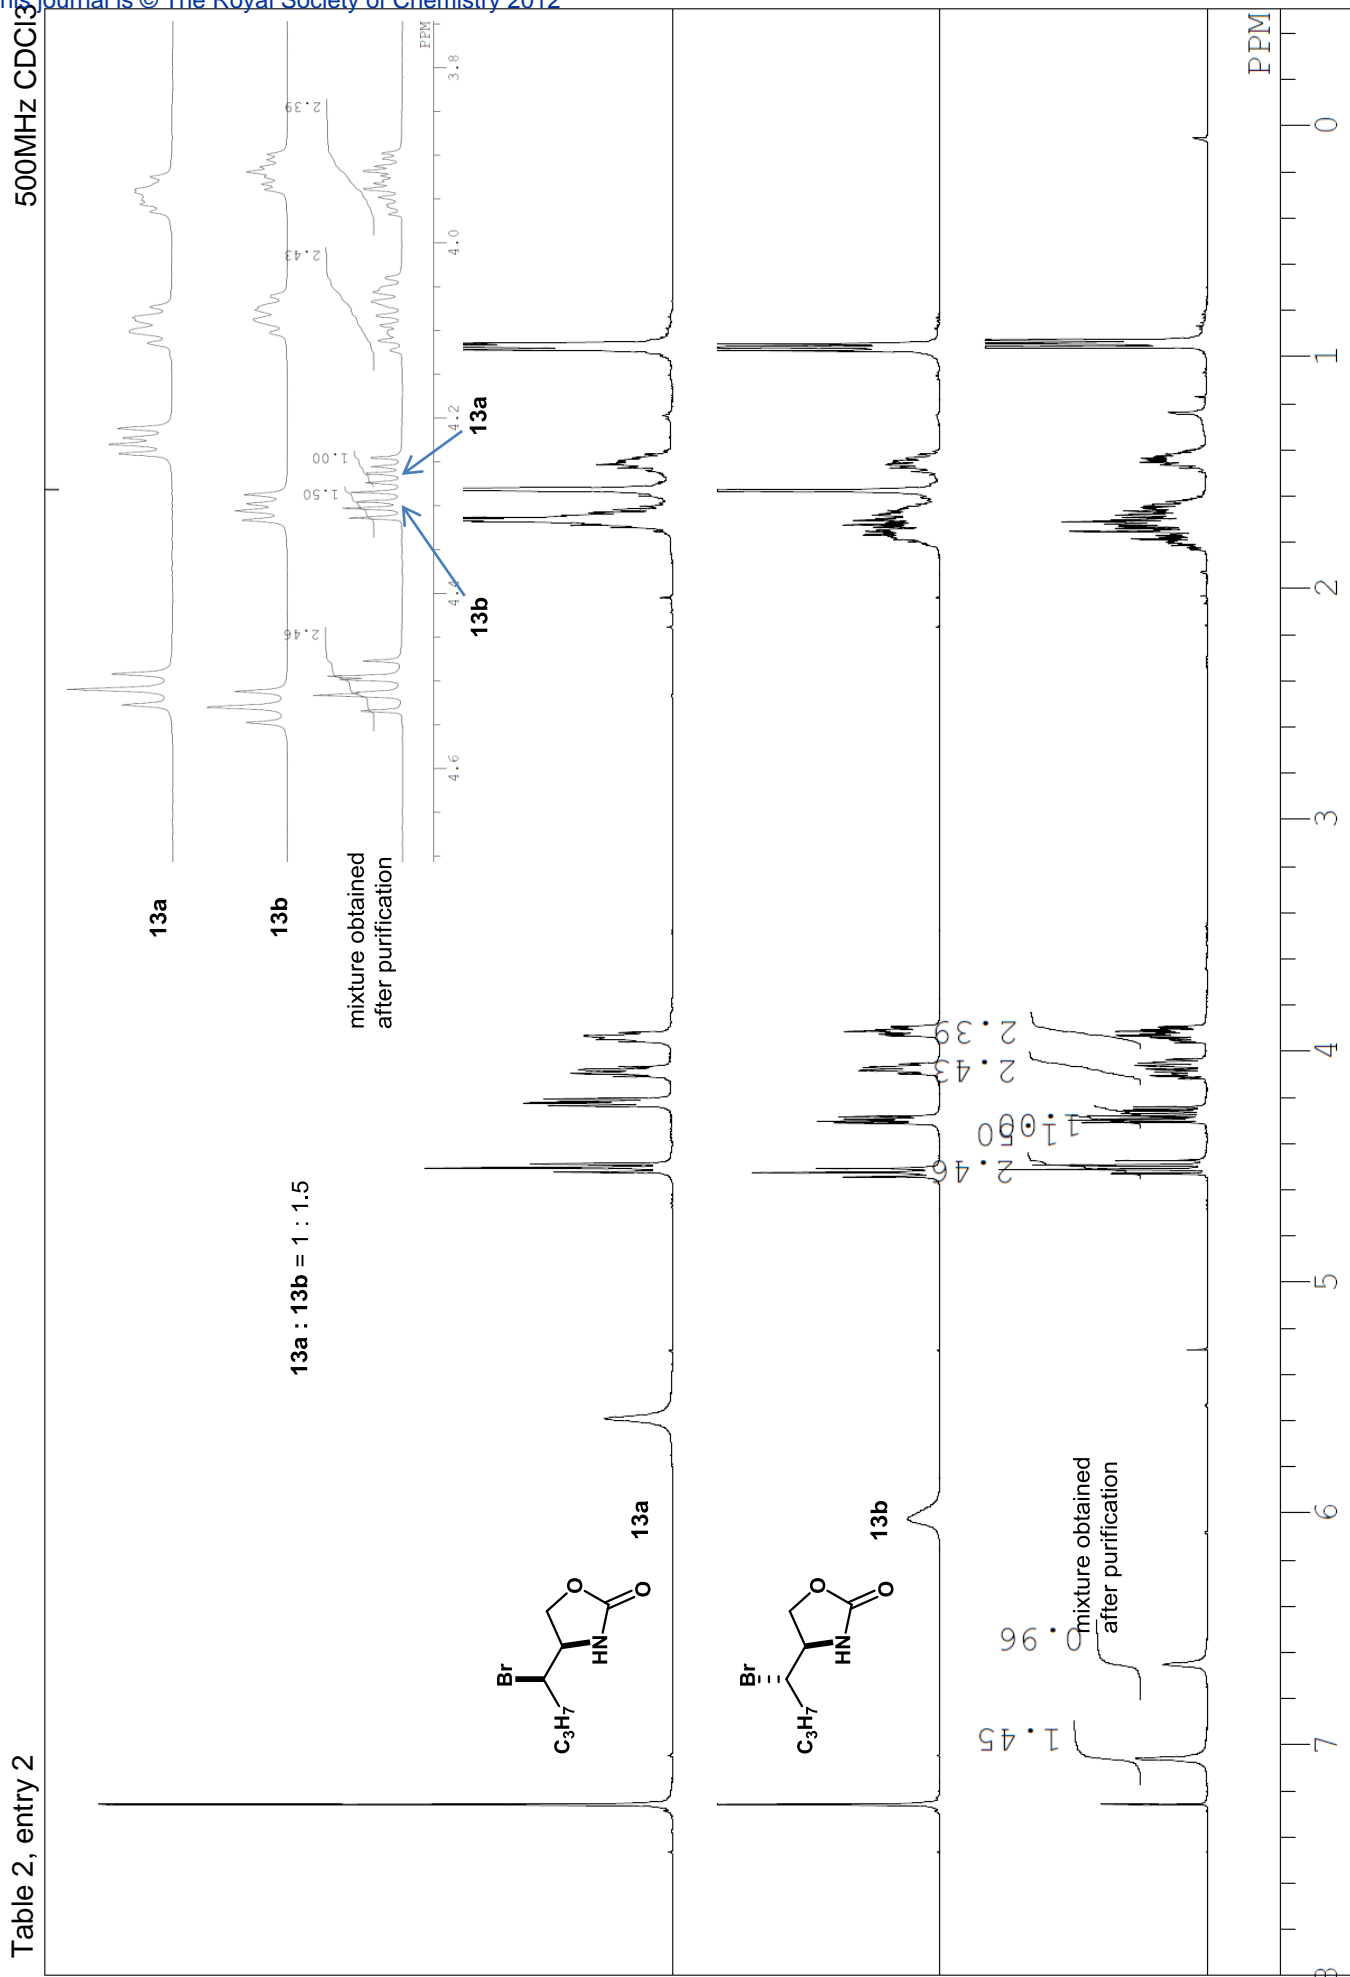



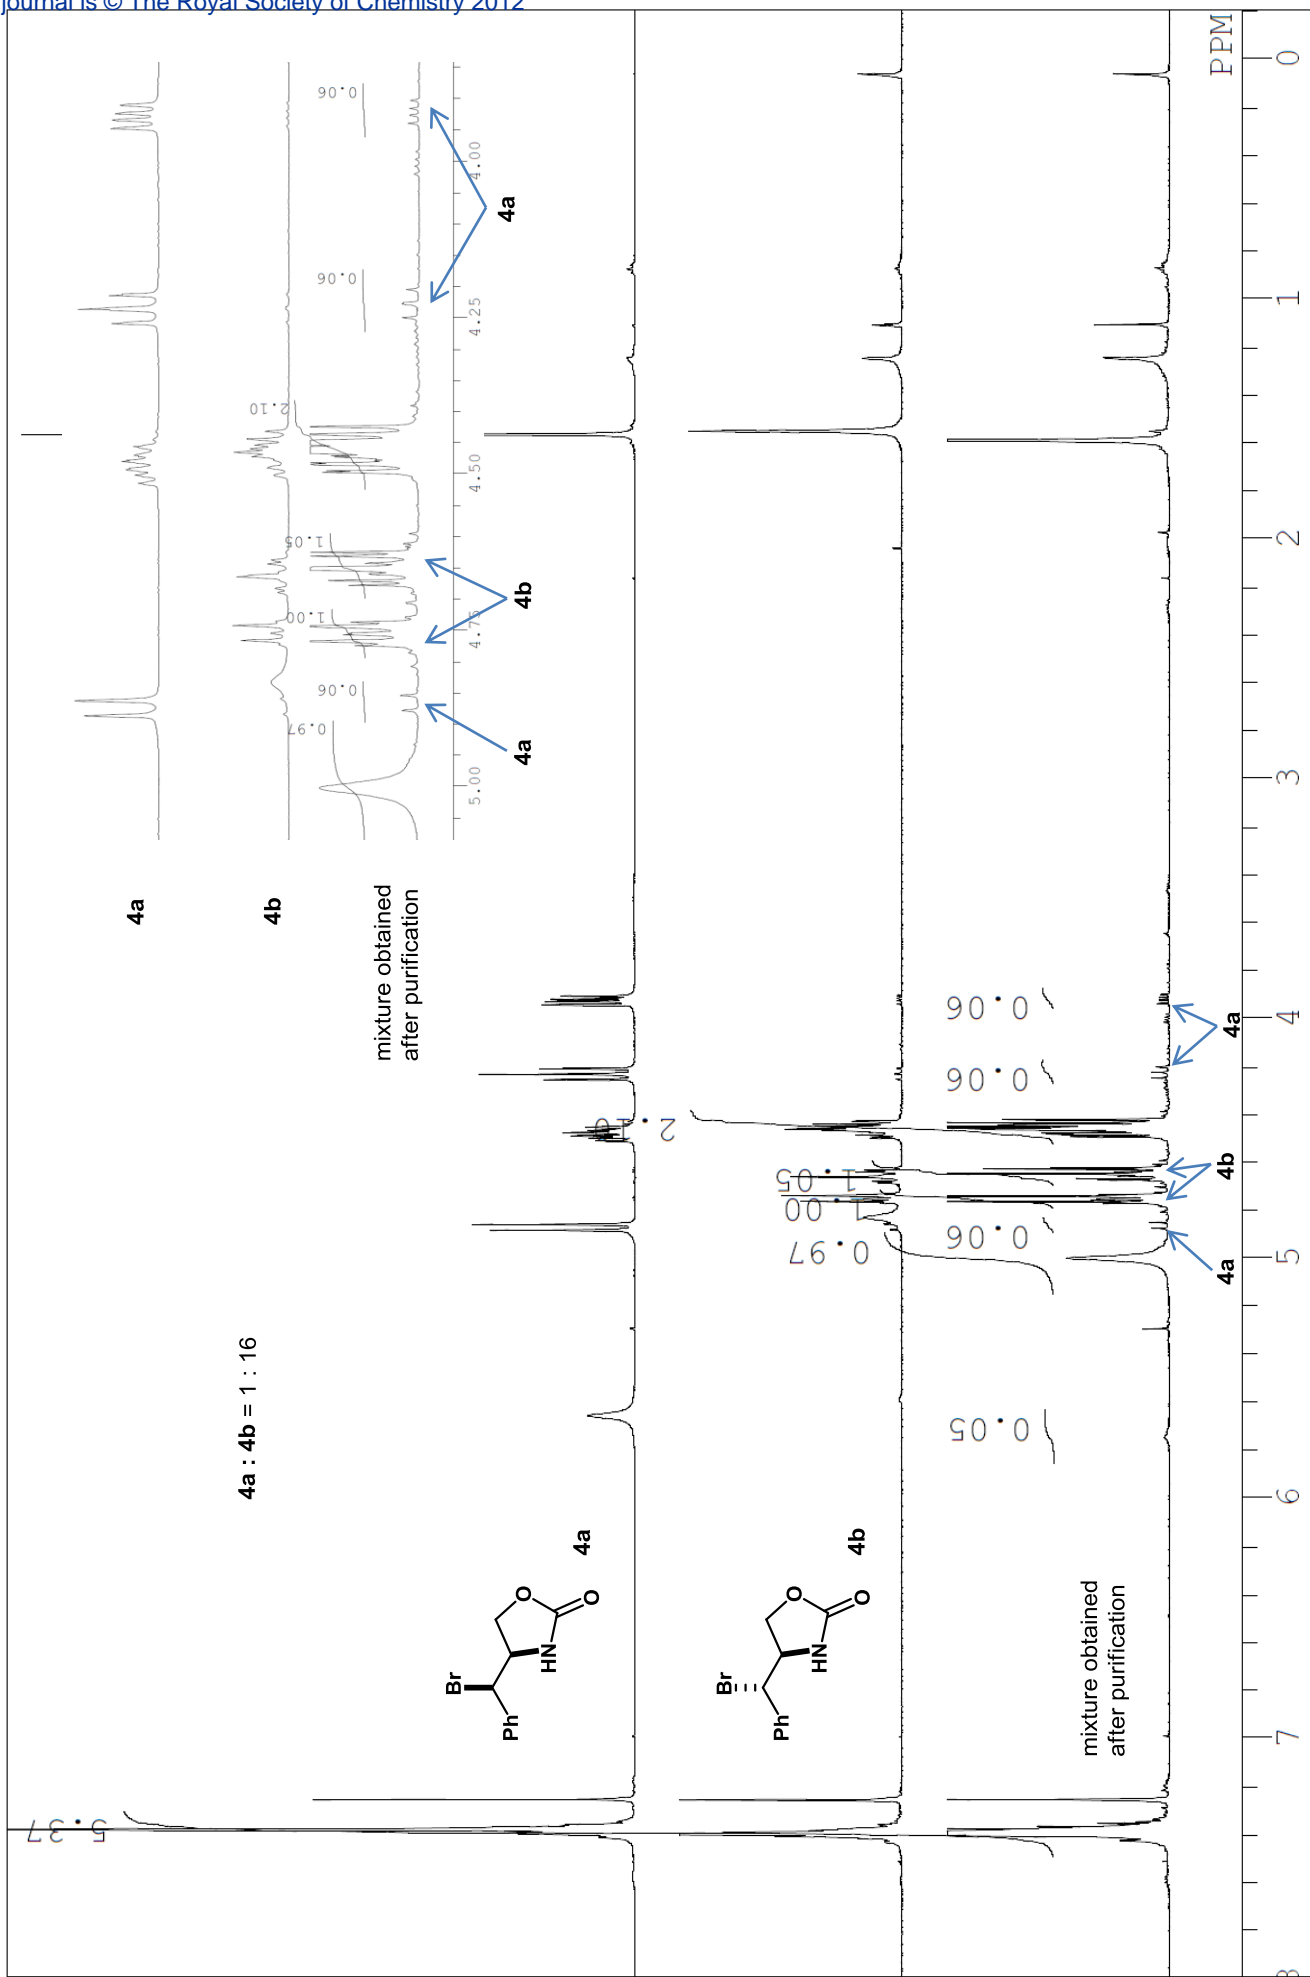

Supplement: c2ob07190h.pdf [file c2ob07190h.pdf]
